# Supplementary material for: Checklist of the vascular flora of the Sunda-Sahul Convergence Zone
Source: Biodivers Data J. 2020 May 18;8:e51094. doi: 10.3897/BDJ.8.e51094 (PMC7248131; doi:10.3897/BDJ.8.e51094)
Supplement: Supplementary material 1 — Checklist of Vascular Flora of the Sunda-Sahul Convergence Zone [file bdj-08-e51094-s001.xlsx]

## Sheet: AustralasiaList
Name	Family	Order	Major group	Genus	Species_epithet	Country	Island	Shelf	MVA regions
Acanthus ebracteatus	Acanthaceae	Lamiales	Angiosperm	Acanthus	ebracteatus	Aus	Aus	Sah	AU Arnhem Land
Acanthus ebracteatus	Acanthaceae	Lamiales	Angiosperm	Acanthus	ebracteatus	Aus	Aus	Sah	AU Cape York Peninsula
Acanthus ebracteatus	Acanthaceae	Lamiales	Angiosperm	Acanthus	ebracteatus	Aus	Aus	Sah	AU Kimberley Plateau
Acanthus ebracteatus	Acanthaceae	Lamiales	Angiosperm	Acanthus	ebracteatus	Ind/PNG	NGu	Sah	NGu
Acanthus ebracteatus	Acanthaceae	Lamiales	Angiosperm	Acanthus	ebracteatus	Ind/Mly/Bru	Bor	Sun	Bor
Acanthus ebracteatus	Acanthaceae	Lamiales	Angiosperm	Acanthus	ebracteatus	Lao	MAs	Sun	MAs
Acanthus ebracteatus	Acanthaceae	Lamiales	Angiosperm	Acanthus	ebracteatus	Mly	MAs	Sun	MAs
Acanthus ebracteatus	Acanthaceae	Lamiales	Angiosperm	Acanthus	ebracteatus	Myn	MAs	Sun	MAs
Acanthus ebracteatus	Acanthaceae	Lamiales	Angiosperm	Acanthus	ebracteatus	Sin	MAs	Sun	MAs
Acanthus ebracteatus	Acanthaceae	Lamiales	Angiosperm	Acanthus	ebracteatus	Ind	Mlk	Wal	Mlk
Acanthus ebracteatus	Acanthaceae	Lamiales	Angiosperm	Acanthus	ebracteatus	Phi	Phi	Wal	Phi
Acanthus ilicifolius	Acanthaceae	Lamiales	Angiosperm	Acanthus	ilicifolius	Aus	Aus	Sah	AU Arnhem Land
Acanthus ilicifolius	Acanthaceae	Lamiales	Angiosperm	Acanthus	ilicifolius	Aus	Aus	Sah	AU Atherton Plateau
Acanthus ilicifolius	Acanthaceae	Lamiales	Angiosperm	Acanthus	ilicifolius	Aus	Aus	Sah	AU Cape York Peninsula
Acanthus ilicifolius	Acanthaceae	Lamiales	Angiosperm	Acanthus	ilicifolius	Aus	Aus	Sah	AU Eastern Queensland
Acanthus ilicifolius	Acanthaceae	Lamiales	Angiosperm	Acanthus	ilicifolius	Ind/PNG	NGu	Sah	NGu
Acanthus ilicifolius	Acanthaceae	Lamiales	Angiosperm	Acanthus	ilicifolius	Cam	MAs	Sun	MAs
Acanthus ilicifolius	Acanthaceae	Lamiales	Angiosperm	Acanthus	ilicifolius	Ind/Mly/Bru	Bor	Sun	Bor
Acanthus ilicifolius	Acanthaceae	Lamiales	Angiosperm	Acanthus	ilicifolius	Lao	MAs	Sun	MAs
Acanthus ilicifolius	Acanthaceae	Lamiales	Angiosperm	Acanthus	ilicifolius	Mly	MAs	Sun	MAs
Acanthus ilicifolius	Acanthaceae	Lamiales	Angiosperm	Acanthus	ilicifolius	Myn	MAs	Sun	MAs
Acanthus ilicifolius	Acanthaceae	Lamiales	Angiosperm	Acanthus	ilicifolius	Sin	MAs	Sun	MAs
Acanthus ilicifolius	Acanthaceae	Lamiales	Angiosperm	Acanthus	ilicifolius	Tha	MAs	Sun	MAs
Acanthus ilicifolius	Acanthaceae	Lamiales	Angiosperm	Acanthus	ilicifolius	Vie	MAs	Sun	MAs
Acanthus ilicifolius	Acanthaceae	Lamiales	Angiosperm	Acanthus	ilicifolius	Ind	Bor	Sun	Bor
Acanthus ilicifolius	Acanthaceae	Lamiales	Angiosperm	Acanthus	ilicifolius	Bru	Bor	Sun	Bor
Acanthus ilicifolius	Acanthaceae	Lamiales	Angiosperm	Acanthus	ilicifolius	Ind	Mlk	Wal	Mlk
Acanthus ilicifolius	Acanthaceae	Lamiales	Angiosperm	Acanthus	ilicifolius	Ind/Tim	LSI	Wal	LSI
Acanthus ilicifolius	Acanthaceae	Lamiales	Angiosperm	Acanthus	ilicifolius	Phi	Phi	Wal	Phi
Acanthus leucostachyus	Acanthaceae	Lamiales	Angiosperm	Acanthus	leucostachyus	Myn	MAs	Sun	MAs
Acanthus volubilis	Acanthaceae	Lamiales	Angiosperm	Acanthus	volubilis	Mly	MAs	Sun	MAs
Acanthus volubilis	Acanthaceae	Lamiales	Angiosperm	Acanthus	volubilis	Sin	MAs	Sun	MAs
Acanthus volubilis	Acanthaceae	Lamiales	Angiosperm	Acanthus	volubilis	Phi	Phi	Wal	Phi
Adenostachya moschifera	Acanthaceae	Lamiales	Angiosperm	Adenostachya	moschifera	Cam	MAs	Sun	MAs
Adenostachya moschifera	Acanthaceae	Lamiales	Angiosperm	Adenostachya	moschifera	Vie	MAs	Sun	MAs
Adhatoda aspera	Acanthaceae	Lamiales	Angiosperm	Adhatoda	aspera	Phi	Phi	Wal	Phi
Adhatoda sphaerosperma	Acanthaceae	Lamiales	Angiosperm	Adhatoda	sphaerosperma	Sin	MAs	Sun	MAs
Andrographis echioides	Acanthaceae	Lamiales	Angiosperm	Andrographis	echioides	Myn	MAs	Sun	MAs
Andrographis laxiflora	Acanthaceae	Lamiales	Angiosperm	Andrographis	laxiflora	Lao	MAs	Sun	MAs
Andrographis laxiflora	Acanthaceae	Lamiales	Angiosperm	Andrographis	laxiflora	Mly	MAs	Sun	MAs
Andrographis laxiflora	Acanthaceae	Lamiales	Angiosperm	Andrographis	laxiflora	Myn	MAs	Sun	MAs
Andrographis laxiflora	Acanthaceae	Lamiales	Angiosperm	Andrographis	laxiflora	Tha	MAs	Sun	MAs
Andrographis paniculata	Acanthaceae	Lamiales	Angiosperm	Andrographis	paniculata	Aus	Aus	Sah	AU Arnhem Land
Andrographis paniculata	Acanthaceae	Lamiales	Angiosperm	Andrographis	paniculata	Cam	MAs	Sun	MAs
Andrographis paniculata	Acanthaceae	Lamiales	Angiosperm	Andrographis	paniculata	Ind	Jav	Sun	Jav
Andrographis paniculata	Acanthaceae	Lamiales	Angiosperm	Andrographis	paniculata	Ind/Mly/Bru	Bor	Sun	Bor
Andrographis paniculata	Acanthaceae	Lamiales	Angiosperm	Andrographis	paniculata	Lao	MAs	Sun	MAs
Andrographis paniculata	Acanthaceae	Lamiales	Angiosperm	Andrographis	paniculata	Mly	MAs	Sun	MAs
Andrographis paniculata	Acanthaceae	Lamiales	Angiosperm	Andrographis	paniculata	Sin	MAs	Sun	MAs
Andrographis paniculata	Acanthaceae	Lamiales	Angiosperm	Andrographis	paniculata	Vie	MAs	Sun	MAs
Andrographis paniculata	Acanthaceae	Lamiales	Angiosperm	Andrographis	paniculata	Ind	Sul	Wal	Sul
Andrographis paniculata	Acanthaceae	Lamiales	Angiosperm	Andrographis	paniculata	Ind/Tim	LSI	Wal	LSI
Andrographis paniculata	Acanthaceae	Lamiales	Angiosperm	Andrographis	paniculata	Phi	Phi	Wal	Phi
Anthacanthus acicularis	Acanthaceae	Lamiales	Angiosperm	Anthacanthus	acicularis	Tha	MAs	Sun	MAs
Aphelandra sinclairiana	Acanthaceae	Lamiales	Angiosperm	Aphelandra	sinclairiana	Sin	MAs	Sun	MAs
Aphelandra squarrosa	Acanthaceae	Lamiales	Angiosperm	Aphelandra	squarrosa	Sin	MAs	Sun	MAs
Asystasia alba	Acanthaceae	Lamiales	Angiosperm	Asystasia	alba	Aus	Aus	Sah	AU External Territories
Asystasia australasica	Acanthaceae	Lamiales	Angiosperm	Asystasia	australasica	Aus	Aus	Sah	AU Atherton Plateau
Asystasia australasica	Acanthaceae	Lamiales	Angiosperm	Asystasia	australasica	Aus	Aus	Sah	AU Cape York Peninsula
Asystasia australasica	Acanthaceae	Lamiales	Angiosperm	Asystasia	australasica	Ind/PNG	NGu	Sah	NGu
Asystasia australasica	Acanthaceae	Lamiales	Angiosperm	Asystasia	australasica	Ind	Mlk	Wal	Mlk
Asystasia australasica	Acanthaceae	Lamiales	Angiosperm	Asystasia	australasica	Ind	Sul	Wal	Sul
Asystasia chelonoides	Acanthaceae	Lamiales	Angiosperm	Asystasia	chelonoides	Sin	MAs	Sun	MAs
Asystasia gangetica	Acanthaceae	Lamiales	Angiosperm	Asystasia	gangetica	Ind/PNG	NGu	Sah	NGu
Asystasia gangetica	Acanthaceae	Lamiales	Angiosperm	Asystasia	gangetica	Cam	MAs	Sun	MAs
Asystasia gangetica	Acanthaceae	Lamiales	Angiosperm	Asystasia	gangetica	Ind/Mly/Bru	Bor	Sun	Bor
Asystasia gangetica	Acanthaceae	Lamiales	Angiosperm	Asystasia	gangetica	Mly	MAs	Sun	MAs
Asystasia gangetica	Acanthaceae	Lamiales	Angiosperm	Asystasia	gangetica	Myn	MAs	Sun	MAs
Asystasia gangetica	Acanthaceae	Lamiales	Angiosperm	Asystasia	gangetica	Sin	MAs	Sun	MAs
Asystasia gangetica	Acanthaceae	Lamiales	Angiosperm	Asystasia	gangetica	Tha	MAs	Sun	MAs
Asystasia gangetica	Acanthaceae	Lamiales	Angiosperm	Asystasia	gangetica	Vie	MAs	Sun	MAs
Asystasia gangetica	Acanthaceae	Lamiales	Angiosperm	Asystasia	gangetica	Ind/Tim	LSI	Wal	LSI
Asystasia gangetica	Acanthaceae	Lamiales	Angiosperm	Asystasia	gangetica	Phi	Phi	Wal	Phi
Asystasia hispida	Acanthaceae	Lamiales	Angiosperm	Asystasia	hispida	Tha	MAs	Sun	MAs
Asystasia nemorum	Acanthaceae	Lamiales	Angiosperm	Asystasia	nemorum	Lao	MAs	Sun	MAs
Asystasia nemorum	Acanthaceae	Lamiales	Angiosperm	Asystasia	nemorum	Myn	MAs	Sun	MAs
Asystasia nemorum	Acanthaceae	Lamiales	Angiosperm	Asystasia	nemorum	Tha	MAs	Sun	MAs
Asystasia nemorum	Acanthaceae	Lamiales	Angiosperm	Asystasia	nemorum	Ind/Tim	LSI	Wal	LSI
Asystasia nemorum	Acanthaceae	Lamiales	Angiosperm	Asystasia	nemorum	Ind	Mlk	Wal	Mlk
Asystasia oppositiflora	Acanthaceae	Lamiales	Angiosperm	Asystasia	oppositiflora	Ind	Mlk	Wal	Mlk
Asystasia oppositiflora	Acanthaceae	Lamiales	Angiosperm	Asystasia	oppositiflora	Ind/Tim	LSI	Wal	LSI
Asystasia salicifolia	Acanthaceae	Lamiales	Angiosperm	Asystasia	salicifolia	Lao	MAs	Sun	MAs
Asystasiella neesiana	Acanthaceae	Lamiales	Angiosperm	Asystasiella	neesiana	Myn	MAs	Sun	MAs
Avicennia germinans	Acanthaceae	Lamiales	Angiosperm	Avicennia	germinans	Myn	MAs	Sun	MAs
Avicennia integra	Acanthaceae	Lamiales	Angiosperm	Avicennia	integra	Aus	Aus	Sah	AU Arnhem Land
Avicennia marina	Acanthaceae	Lamiales	Angiosperm	Avicennia	marina	Aus	Aus	Sah	AU Adelaide
Avicennia marina	Acanthaceae	Lamiales	Angiosperm	Avicennia	marina	Aus	Aus	Sah	AU Arnhem Land
Avicennia marina	Acanthaceae	Lamiales	Angiosperm	Avicennia	marina	Aus	Aus	Sah	AU Atherton Plateau
Avicennia marina	Acanthaceae	Lamiales	Angiosperm	Avicennia	marina	Aus	Aus	Sah	AU Cape York Peninsula
Avicennia marina	Acanthaceae	Lamiales	Angiosperm	Avicennia	marina	Aus	Aus	Sah	AU Eastern Queensland
Avicennia marina	Acanthaceae	Lamiales	Angiosperm	Avicennia	marina	Aus	Aus	Sah	AU External Territories
Avicennia marina	Acanthaceae	Lamiales	Angiosperm	Avicennia	marina	Aus	Aus	Sah	AU Eyre Peninsula
Avicennia marina	Acanthaceae	Lamiales	Angiosperm	Avicennia	marina	Aus	Aus	Sah	AU Great Sandy Desert Interzone
Avicennia marina	Acanthaceae	Lamiales	Angiosperm	Avicennia	marina	Aus	Aus	Sah	AU Kimberley Plateau
Avicennia marina	Acanthaceae	Lamiales	Angiosperm	Avicennia	marina	Aus	Aus	Sah	AU Nullarbor
Avicennia marina	Acanthaceae	Lamiales	Angiosperm	Avicennia	marina	Aus	Aus	Sah	AU Southeastern
Avicennia marina	Acanthaceae	Lamiales	Angiosperm	Avicennia	marina	Aus	Aus	Sah	AU Southwestern
Avicennia marina	Acanthaceae	Lamiales	Angiosperm	Avicennia	marina	Aus	Aus	Sah	AU Victoria
Avicennia marina	Acanthaceae	Lamiales	Angiosperm	Avicennia	marina	Aus	Aus	Sah	AU Western Desert
Avicennia marina	Acanthaceae	Lamiales	Angiosperm	Avicennia	marina	Ind/PNG	NGu	Sah	NGu
Avicennia marina	Acanthaceae	Lamiales	Angiosperm	Avicennia	marina	Ind	Jav	Sun	Jav
Avicennia marina	Acanthaceae	Lamiales	Angiosperm	Avicennia	marina	Ind/Mly/Bru	Bor	Sun	Bor
Avicennia marina	Acanthaceae	Lamiales	Angiosperm	Avicennia	marina	Mly	MAs	Sun	MAs
Avicennia marina	Acanthaceae	Lamiales	Angiosperm	Avicennia	marina	Myn	MAs	Sun	MAs
Avicennia marina	Acanthaceae	Lamiales	Angiosperm	Avicennia	marina	Sin	MAs	Sun	MAs
Avicennia marina	Acanthaceae	Lamiales	Angiosperm	Avicennia	marina	Tha	MAs	Sun	MAs
Avicennia marina	Acanthaceae	Lamiales	Angiosperm	Avicennia	marina	Vie	MAs	Sun	MAs
Avicennia marina	Acanthaceae	Lamiales	Angiosperm	Avicennia	marina	Bru	Bor	Sun	Bor
Avicennia marina	Acanthaceae	Lamiales	Angiosperm	Avicennia	marina	Ind	Sul	Wal	Sul
Avicennia marina	Acanthaceae	Lamiales	Angiosperm	Avicennia	marina	Ind	Mlk	Wal	Mlk
Avicennia marina	Acanthaceae	Lamiales	Angiosperm	Avicennia	marina	Ind/Tim	LSI	Wal	LSI
Avicennia marina	Acanthaceae	Lamiales	Angiosperm	Avicennia	marina	Phi	Phi	Wal	Phi
Avicennia officinalis	Acanthaceae	Lamiales	Angiosperm	Avicennia	officinalis	Ind/PNG	NGu	Sah	NGu
Avicennia officinalis	Acanthaceae	Lamiales	Angiosperm	Avicennia	officinalis	Cam	MAs	Sun	MAs
Avicennia officinalis	Acanthaceae	Lamiales	Angiosperm	Avicennia	officinalis	Ind	Jav	Sun	Jav
Avicennia officinalis	Acanthaceae	Lamiales	Angiosperm	Avicennia	officinalis	Ind	Sum	Sun	Sum
Avicennia officinalis	Acanthaceae	Lamiales	Angiosperm	Avicennia	officinalis	Ind/Mly/Bru	Bor	Sun	Bor
Avicennia officinalis	Acanthaceae	Lamiales	Angiosperm	Avicennia	officinalis	Mly	MAs	Sun	MAs
Avicennia officinalis	Acanthaceae	Lamiales	Angiosperm	Avicennia	officinalis	Myn	MAs	Sun	MAs
Avicennia officinalis	Acanthaceae	Lamiales	Angiosperm	Avicennia	officinalis	Sin	MAs	Sun	MAs
Avicennia officinalis	Acanthaceae	Lamiales	Angiosperm	Avicennia	officinalis	Vie	MAs	Sun	MAs
Avicennia officinalis	Acanthaceae	Lamiales	Angiosperm	Avicennia	officinalis	Ind	Mlk	Wal	Mlk
Avicennia officinalis	Acanthaceae	Lamiales	Angiosperm	Avicennia	officinalis	Ind	Sul	Wal	Sul
Avicennia officinalis	Acanthaceae	Lamiales	Angiosperm	Avicennia	officinalis	Phi	Phi	Wal	Phi
Barleria conspicua	Acanthaceae	Lamiales	Angiosperm	Barleria	conspicua	Mly	MAs	Sun	MAs
Barleria cristata	Acanthaceae	Lamiales	Angiosperm	Barleria	cristata	Ind/PNG	NGu	Sah	NGu
Barleria cristata	Acanthaceae	Lamiales	Angiosperm	Barleria	cristata	Ind/Mly/Bru	Bor	Sun	Bor
Barleria cristata	Acanthaceae	Lamiales	Angiosperm	Barleria	cristata	Myn	MAs	Sun	MAs
Barleria cristata	Acanthaceae	Lamiales	Angiosperm	Barleria	cristata	Sin	MAs	Sun	MAs
Barleria cristata	Acanthaceae	Lamiales	Angiosperm	Barleria	cristata	Phi	Phi	Wal	Phi
Barleria longiflora	Acanthaceae	Lamiales	Angiosperm	Barleria	longiflora	Myn	MAs	Sun	MAs
Barleria lupulina	Acanthaceae	Lamiales	Angiosperm	Barleria	lupulina	Ind/PNG	NGu	Sah	NGu
Barleria lupulina	Acanthaceae	Lamiales	Angiosperm	Barleria	lupulina	Cam	MAs	Sun	MAs
Barleria lupulina	Acanthaceae	Lamiales	Angiosperm	Barleria	lupulina	Sin	MAs	Sun	MAs
Barleria lupulina	Acanthaceae	Lamiales	Angiosperm	Barleria	lupulina	Vie	MAs	Sun	MAs
Barleria lupulina	Acanthaceae	Lamiales	Angiosperm	Barleria	lupulina	Ind	Mlk	Wal	Mlk
Barleria lupulina	Acanthaceae	Lamiales	Angiosperm	Barleria	lupulina	Ind/Tim	LSI	Wal	LSI
Barleria lupulina	Acanthaceae	Lamiales	Angiosperm	Barleria	lupulina	Phi	Phi	Wal	Phi
Barleria nitida	Acanthaceae	Lamiales	Angiosperm	Barleria	nitida	Myn	MAs	Sun	MAs
Barleria obtusa	Acanthaceae	Lamiales	Angiosperm	Barleria	obtusa	Sin	MAs	Sun	MAs
Barleria prionitis	Acanthaceae	Lamiales	Angiosperm	Barleria	prionitis	Ind/PNG	NGu	Sah	NGu
Barleria prionitis	Acanthaceae	Lamiales	Angiosperm	Barleria	prionitis	Cam	MAs	Sun	MAs
Barleria prionitis	Acanthaceae	Lamiales	Angiosperm	Barleria	prionitis	Lao	MAs	Sun	MAs
Barleria prionitis	Acanthaceae	Lamiales	Angiosperm	Barleria	prionitis	Mly	MAs	Sun	MAs
Barleria prionitis	Acanthaceae	Lamiales	Angiosperm	Barleria	prionitis	Myn	MAs	Sun	MAs
Barleria prionitis	Acanthaceae	Lamiales	Angiosperm	Barleria	prionitis	Tha	MAs	Sun	MAs
Barleria prionitis	Acanthaceae	Lamiales	Angiosperm	Barleria	prionitis	Vie	MAs	Sun	MAs
Barleria prionitis	Acanthaceae	Lamiales	Angiosperm	Barleria	prionitis	Ind	Mlk	Wal	Mlk
Barleria prionitis	Acanthaceae	Lamiales	Angiosperm	Barleria	prionitis	Ind	Sul	Wal	Sul
Barleria prionitis	Acanthaceae	Lamiales	Angiosperm	Barleria	prionitis	Ind/Tim	LSI	Wal	LSI
Barleria prionitis	Acanthaceae	Lamiales	Angiosperm	Barleria	prionitis	Phi	Phi	Wal	Phi
Barleria repens	Acanthaceae	Lamiales	Angiosperm	Barleria	repens	Sin	MAs	Sun	MAs
Barleria siamensis	Acanthaceae	Lamiales	Angiosperm	Barleria	siamensis	Mly	MAs	Sun	MAs
Barleria siamensis	Acanthaceae	Lamiales	Angiosperm	Barleria	siamensis	Ind	Sul	Wal	Sul
Barleria strigosa	Acanthaceae	Lamiales	Angiosperm	Barleria	strigosa	Cam	MAs	Sun	MAs
Barleria strigosa	Acanthaceae	Lamiales	Angiosperm	Barleria	strigosa	Lao	MAs	Sun	MAs
Barleria strigosa	Acanthaceae	Lamiales	Angiosperm	Barleria	strigosa	Myn	MAs	Sun	MAs
Barleria strigosa	Acanthaceae	Lamiales	Angiosperm	Barleria	strigosa	Vie	MAs	Sun	MAs
Blechum pyramidatum	Acanthaceae	Lamiales	Angiosperm	Blechum	pyramidatum	Ind/PNG	NGu	Sah	NGu
Blechum pyramidatum	Acanthaceae	Lamiales	Angiosperm	Blechum	pyramidatum	Ind/Tim	LSI	Wal	LSI
Blechum pyramidatum	Acanthaceae	Lamiales	Angiosperm	Blechum	pyramidatum	Phi	Phi	Wal	Phi
Blepharis javanica	Acanthaceae	Lamiales	Angiosperm	Blepharis	javanica	Ind	Jav	Sun	Jav
Blepharis maderaspatensis	Acanthaceae	Lamiales	Angiosperm	Blepharis	maderaspatensis	Myn	MAs	Sun	MAs
Borneacanthus grandifolius	Acanthaceae	Lamiales	Angiosperm	Borneacanthus	grandifolius	Ind/Mly/Bru	Bor	Sun	Bor
Brunoniella acaulis	Acanthaceae	Lamiales	Angiosperm	Brunoniella	acaulis	Aus	Aus	Sah	AU Arnhem Land
Brunoniella acaulis	Acanthaceae	Lamiales	Angiosperm	Brunoniella	acaulis	Aus	Aus	Sah	AU Atherton Plateau
Brunoniella acaulis	Acanthaceae	Lamiales	Angiosperm	Brunoniella	acaulis	Aus	Aus	Sah	AU Cape York Peninsula
Brunoniella acaulis	Acanthaceae	Lamiales	Angiosperm	Brunoniella	acaulis	Aus	Aus	Sah	AU Central Queensland
Brunoniella acaulis	Acanthaceae	Lamiales	Angiosperm	Brunoniella	acaulis	Aus	Aus	Sah	AU Eastern Queensland
Brunoniella acaulis	Acanthaceae	Lamiales	Angiosperm	Brunoniella	acaulis	Ind/PNG	NGu	Sah	NGu
Brunoniella australis	Acanthaceae	Lamiales	Angiosperm	Brunoniella	australis	Aus	Aus	Sah	AU Arnhem Land
Brunoniella australis	Acanthaceae	Lamiales	Angiosperm	Brunoniella	australis	Aus	Aus	Sah	AU Atherton Plateau
Brunoniella australis	Acanthaceae	Lamiales	Angiosperm	Brunoniella	australis	Aus	Aus	Sah	AU Cape York Peninsula
Brunoniella australis	Acanthaceae	Lamiales	Angiosperm	Brunoniella	australis	Aus	Aus	Sah	AU Central Desert
Brunoniella australis	Acanthaceae	Lamiales	Angiosperm	Brunoniella	australis	Aus	Aus	Sah	AU Central Queensland
Brunoniella australis	Acanthaceae	Lamiales	Angiosperm	Brunoniella	australis	Aus	Aus	Sah	AU Eastern Desert
Brunoniella australis	Acanthaceae	Lamiales	Angiosperm	Brunoniella	australis	Aus	Aus	Sah	AU Eastern Queensland
Brunoniella australis	Acanthaceae	Lamiales	Angiosperm	Brunoniella	australis	Aus	Aus	Sah	AU Kimberley Plateau
Brunoniella australis	Acanthaceae	Lamiales	Angiosperm	Brunoniella	australis	Aus	Aus	Sah	AU Southeastern
Brunoniella linearifolia	Acanthaceae	Lamiales	Angiosperm	Brunoniella	linearifolia	Aus	Aus	Sah	AU Arnhem Land
Brunoniella pumilio	Acanthaceae	Lamiales	Angiosperm	Brunoniella	pumilio	Aus	Aus	Sah	AU Southeastern
Brunoniella pumilio	Acanthaceae	Lamiales	Angiosperm	Brunoniella	pumilio	Aus	Aus	Sah	AU Victoria
Brunoniella spiciflora	Acanthaceae	Lamiales	Angiosperm	Brunoniella	spiciflora	Aus	Aus	Sah	AU Eastern Queensland
Brunoniella spiciflora	Acanthaceae	Lamiales	Angiosperm	Brunoniella	spiciflora	Aus	Aus	Sah	AU Southeastern
Calophanoides pubescens	Acanthaceae	Lamiales	Angiosperm	Calophanoides	pubescens	Phi	Phi	Wal	Phi
Calycacanthus magnusianus	Acanthaceae	Lamiales	Angiosperm	Calycacanthus	magnusianus	Ind/PNG	NGu	Sah	NGu
Chroesthes bracteata	Acanthaceae	Lamiales	Angiosperm	Chroesthes	bracteata	Tha	MAs	Sun	MAs
Chroesthes lanceolata	Acanthaceae	Lamiales	Angiosperm	Chroesthes	lanceolata	Lao	MAs	Sun	MAs
Chroesthes lanceolata	Acanthaceae	Lamiales	Angiosperm	Chroesthes	lanceolata	Tha	MAs	Sun	MAs
Chroesthes longifolia	Acanthaceae	Lamiales	Angiosperm	Chroesthes	longifolia	Mly	MAs	Sun	MAs
Clarkeasia parviflora	Acanthaceae	Lamiales	Angiosperm	Clarkeasia	parviflora	Tha	MAs	Sun	MAs
Clinacanthus nutans	Acanthaceae	Lamiales	Angiosperm	Clinacanthus	nutans	Ind	Jav	Sun	Jav
Clinacanthus nutans	Acanthaceae	Lamiales	Angiosperm	Clinacanthus	nutans	Lao	MAs	Sun	MAs
Clinacanthus nutans	Acanthaceae	Lamiales	Angiosperm	Clinacanthus	nutans	Tha	MAs	Sun	MAs
Codonacanthus pauciflorus	Acanthaceae	Lamiales	Angiosperm	Codonacanthus	pauciflorus	Cam	MAs	Sun	MAs
Codonacanthus pauciflorus	Acanthaceae	Lamiales	Angiosperm	Codonacanthus	pauciflorus	Vie	MAs	Sun	MAs
Cosmianthemum dido	Acanthaceae	Lamiales	Angiosperm	Cosmianthemum	dido	Ind/Mly/Bru	Bor	Sun	Bor
Cosmianthemum knoxiifolium	Acanthaceae	Lamiales	Angiosperm	Cosmianthemum	knoxiifolium	Ind/Mly/Bru	Bor	Sun	Bor
Cosmianthemum knoxiifolium	Acanthaceae	Lamiales	Angiosperm	Cosmianthemum	knoxiifolium	Mly	MAs	Sun	MAs
Cosmianthemum magnifolium	Acanthaceae	Lamiales	Angiosperm	Cosmianthemum	magnifolium	Ind/Mly/Bru	Bor	Sun	Bor
Cosmianthemum subglabrum	Acanthaceae	Lamiales	Angiosperm	Cosmianthemum	subglabrum	Ind/Mly/Bru	Bor	Sun	Bor
Crossandra infundibuliformis	Acanthaceae	Lamiales	Angiosperm	Crossandra	infundibuliformis	Sin	MAs	Sun	MAs
Crossandra pungens	Acanthaceae	Lamiales	Angiosperm	Crossandra	pungens	Sin	MAs	Sun	MAs
Cryptophragmium thorelii	Acanthaceae	Lamiales	Angiosperm	Cryptophragmium	thorelii	Lao	Mas	Sun	Mas
Cystacanthus vitellinus	Acanthaceae	Lamiales	Angiosperm	Cystacanthus	vitellinus	Cam	MAs	Sun	MAs
Cystacanthus vitellinus	Acanthaceae	Lamiales	Angiosperm	Cystacanthus	vitellinus	Vie	MAs	Sun	MAs
Dicladanthera forrestii	Acanthaceae	Lamiales	Angiosperm	Dicladanthera	forrestii	Aus	Aus	Sah	AU Great Sandy Desert Interzone
Dicladanthera forrestii	Acanthaceae	Lamiales	Angiosperm	Dicladanthera	forrestii	Aus	Aus	Sah	AU Western Desert
Dicladanthera glabra	Acanthaceae	Lamiales	Angiosperm	Dicladanthera	glabra	Aus	Aus	Sah	AU Great Sandy Desert Interzone
Dicliptera armata	Acanthaceae	Lamiales	Angiosperm	Dicliptera	armata	Aus	Aus	Sah	AU Arnhem Land
Dicliptera armata	Acanthaceae	Lamiales	Angiosperm	Dicliptera	armata	Aus	Aus	Sah	AU Cape York Peninsula
Dicliptera armata	Acanthaceae	Lamiales	Angiosperm	Dicliptera	armata	Aus	Aus	Sah	AU Central Desert
Dicliptera armata	Acanthaceae	Lamiales	Angiosperm	Dicliptera	armata	Aus	Aus	Sah	AU Central Queensland
Dicliptera armata	Acanthaceae	Lamiales	Angiosperm	Dicliptera	armata	Aus	Aus	Sah	AU Great Sandy Desert Interzone
Dicliptera armata	Acanthaceae	Lamiales	Angiosperm	Dicliptera	armata	Aus	Aus	Sah	AU Kimberley Plateau
Dicliptera arnhemica	Acanthaceae	Lamiales	Angiosperm	Dicliptera	arnhemica	Aus	Aus	Sah	AU Arnhem Land
Dicliptera arnhemica	Acanthaceae	Lamiales	Angiosperm	Dicliptera	arnhemica	Aus	Aus	Sah	AU Central Desert
Dicliptera australis	Acanthaceae	Lamiales	Angiosperm	Dicliptera	australis	Aus	Aus	Sah	AU Arnhem Land
Dicliptera babui	Acanthaceae	Lamiales	Angiosperm	Dicliptera	babui	Tha	MAs	Sun	MAs
Dicliptera bupleuroides	Acanthaceae	Lamiales	Angiosperm	Dicliptera	bupleuroides	Myn	MAs	Sun	MAs
Dicliptera burmanni	Acanthaceae	Lamiales	Angiosperm	Dicliptera	burmanni	Ind/PNG	NGu	Sah	NGu
Dicliptera chinensis	Acanthaceae	Lamiales	Angiosperm	Dicliptera	chinensis	Cam	MAs	Sun	MAs
Dicliptera chinensis	Acanthaceae	Lamiales	Angiosperm	Dicliptera	chinensis	Tha	MAs	Sun	MAs
Dicliptera chinensis	Acanthaceae	Lamiales	Angiosperm	Dicliptera	chinensis	Vie	MAs	Sun	MAs
Dicliptera ciliata	Acanthaceae	Lamiales	Angiosperm	Dicliptera	ciliata	Aus	Aus	Sah	AU Arnhem Land
Dicliptera ciliata	Acanthaceae	Lamiales	Angiosperm	Dicliptera	ciliata	Aus	Aus	Sah	AU Cape York Peninsula
Dicliptera ciliata	Acanthaceae	Lamiales	Angiosperm	Dicliptera	ciliata	Aus	Aus	Sah	AU External Territories
Dicliptera ciliata	Acanthaceae	Lamiales	Angiosperm	Dicliptera	ciliata	Aus	Aus	Sah	AU Kimberley Plateau
Dicliptera ciliata	Acanthaceae	Lamiales	Angiosperm	Dicliptera	ciliata	Ind/Tim	LSI	Wal	LSI
Dicliptera clarkei	Acanthaceae	Lamiales	Angiosperm	Dicliptera	clarkei	Phi	Phi	Wal	Phi
Dicliptera fragilis	Acanthaceae	Lamiales	Angiosperm	Dicliptera	fragilis	Tha	MAs	Sun	MAs
Dicliptera glabra	Acanthaceae	Lamiales	Angiosperm	Dicliptera	glabra	Aus	Aus	Sah	AU Cape York Peninsula
Dicliptera glabra	Acanthaceae	Lamiales	Angiosperm	Dicliptera	glabra	Aus	Aus	Sah	AU Kimberley Plateau
Dicliptera glabra	Acanthaceae	Lamiales	Angiosperm	Dicliptera	glabra	Phi	Phi	Wal	Phi
Dicliptera kurzii	Acanthaceae	Lamiales	Angiosperm	Dicliptera	kurzii	Myn	MAs	Sun	MAs
Dicliptera leonotis	Acanthaceae	Lamiales	Angiosperm	Dicliptera	leonotis	Ind/Tim	LSI	Wal	LSI
Dicliptera leonotis	Acanthaceae	Lamiales	Angiosperm	Dicliptera	leonotis	Phi	Phi	Wal	Phi
Dicliptera maclearii	Acanthaceae	Lamiales	Angiosperm	Dicliptera	maclearii	Aus	Aus	Sah	AU Unclassified
Dicliptera miscella	Acanthaceae	Lamiales	Angiosperm	Dicliptera	miscella	Aus	Aus	Sah	AU Kimberley Plateau
Dicliptera paniculata	Acanthaceae	Lamiales	Angiosperm	Dicliptera	paniculata	Myn	MAs	Sun	MAs
Dicliptera paniculata	Acanthaceae	Lamiales	Angiosperm	Dicliptera	paniculata	Phi	Phi	Wal	Phi
Dicliptera papuana	Acanthaceae	Lamiales	Angiosperm	Dicliptera	papuana	Ind/PNG	NGu	Sah	NGu
Dicliptera riparia	Acanthaceae	Lamiales	Angiosperm	Dicliptera	riparia	Myn	MAs	Sun	MAs
Dicliptera rosea	Acanthaceae	Lamiales	Angiosperm	Dicliptera	rosea	Mly	MAs	Sun	MAs
Dicliptera speciosa	Acanthaceae	Lamiales	Angiosperm	Dicliptera	speciosa	Mly	MAs	Sun	MAs
Dicliptera speciosa	Acanthaceae	Lamiales	Angiosperm	Dicliptera	speciosa	Myn	MAs	Sun	MAs
Dicliptera spicata	Acanthaceae	Lamiales	Angiosperm	Dicliptera	spicata	Aus	Aus	Sah	AU Arnhem Land
Dicliptera spicata	Acanthaceae	Lamiales	Angiosperm	Dicliptera	spicata	Aus	Aus	Sah	AU Atherton Plateau
Dicliptera spicata	Acanthaceae	Lamiales	Angiosperm	Dicliptera	spicata	Aus	Aus	Sah	AU Cape York Peninsula
Dicliptera spicata	Acanthaceae	Lamiales	Angiosperm	Dicliptera	spicata	Aus	Aus	Sah	AU Central Desert
Dicliptera spicata	Acanthaceae	Lamiales	Angiosperm	Dicliptera	spicata	Ind/Tim	LSI	Wal	LSI
Dicliptera squarrosa	Acanthaceae	Lamiales	Angiosperm	Dicliptera	squarrosa	Myn	MAs	Sun	MAs
Dicliptera squarrosa	Acanthaceae	Lamiales	Angiosperm	Dicliptera	squarrosa	Tha	MAs	Sun	MAs
Dicliptera vestita	Acanthaceae	Lamiales	Angiosperm	Dicliptera	vestita	Lao	MAs	Sun	MAs
Dicliptera zollingeri	Acanthaceae	Lamiales	Angiosperm	Dicliptera	zollingeri	Ind	Mlk	Wal	Mlk
Dicliptera zollingeri	Acanthaceae	Lamiales	Angiosperm	Dicliptera	zollingeri	Ind/Tim	LSI	Wal	LSI
Dipteracanthus australasicus	Acanthaceae	Lamiales	Angiosperm	Dipteracanthus	australasicus	Aus	Aus	Sah	AU Arnhem Land
Dipteracanthus australasicus	Acanthaceae	Lamiales	Angiosperm	Dipteracanthus	australasicus	Aus	Aus	Sah	AU Cape York Peninsula
Dipteracanthus australasicus	Acanthaceae	Lamiales	Angiosperm	Dipteracanthus	australasicus	Aus	Aus	Sah	AU Central Queensland
Dipteracanthus australasicus	Acanthaceae	Lamiales	Angiosperm	Dipteracanthus	australasicus	Aus	Aus	Sah	AU Eastern Desert
Dipteracanthus australasicus	Acanthaceae	Lamiales	Angiosperm	Dipteracanthus	australasicus	Aus	Aus	Sah	AU Eastern Queensland
Dipteracanthus australasicus	Acanthaceae	Lamiales	Angiosperm	Dipteracanthus	australasicus	Aus	Aus	Sah	AU Great Sandy Desert Interzone
Dipteracanthus australasicus	Acanthaceae	Lamiales	Angiosperm	Dipteracanthus	australasicus	Aus	Aus	Sah	AU Western Desert
Dipteracanthus bracteatus	Acanthaceae	Lamiales	Angiosperm	Dipteracanthus	bracteatus	Aus	Aus	Sah	AU Arnhem Land
Dipteracanthus bracteatus	Acanthaceae	Lamiales	Angiosperm	Dipteracanthus	bracteatus	Aus	Aus	Sah	AU Atherton Plateau
Dipteracanthus bracteatus	Acanthaceae	Lamiales	Angiosperm	Dipteracanthus	bracteatus	Aus	Aus	Sah	AU Cape York Peninsula
Dyschoriste erecta	Acanthaceae	Lamiales	Angiosperm	Dyschoriste	erecta	Ind/PNG	NGu	Sah	NGu
Dyschoriste erecta	Acanthaceae	Lamiales	Angiosperm	Dyschoriste	erecta	Cam	MAs	Sun	MAs
Dyschoriste erecta	Acanthaceae	Lamiales	Angiosperm	Dyschoriste	erecta	Lao	MAs	Sun	MAs
Dyschoriste erecta	Acanthaceae	Lamiales	Angiosperm	Dyschoriste	erecta	Vie	MAs	Sun	MAs
Dyschoriste oligosperma	Acanthaceae	Lamiales	Angiosperm	Dyschoriste	oligosperma	Ind/PNG	NGu	Sah	NGu
Dyschoriste oligosperma	Acanthaceae	Lamiales	Angiosperm	Dyschoriste	oligosperma	Ind/Mly/Bru	Bor	Sun	Bor
Ebermaiera helferi	Acanthaceae	Lamiales	Angiosperm	Ebermaiera	helferi	Myn	MAs	Sun	MAs
Elytraria imbricata	Acanthaceae	Lamiales	Angiosperm	Elytraria	imbricata	Phi	Phi	Wal	Phi
Eranthemum bifarium	Acanthaceae	Lamiales	Angiosperm	Eranthemum	bifarium	Myn	MAs	Sun	MAs
Eranthemum burmanicum	Acanthaceae	Lamiales	Angiosperm	Eranthemum	burmanicum	Myn	MAs	Sun	MAs
Eranthemum candidum	Acanthaceae	Lamiales	Angiosperm	Eranthemum	candidum	Mly	MAs	Sun	MAs
Eranthemum capense	Acanthaceae	Lamiales	Angiosperm	Eranthemum	capense	Myn	MAs	Sun	MAs
Eranthemum caudifolium	Acanthaceae	Lamiales	Angiosperm	Eranthemum	caudifolium	Mly	MAs	Sun	MAs
Eranthemum ciliatum	Acanthaceae	Lamiales	Angiosperm	Eranthemum	ciliatum	Myn	MAs	Sun	MAs
Eranthemum griffithii	Acanthaceae	Lamiales	Angiosperm	Eranthemum	griffithii	Myn	MAs	Sun	MAs
Eranthemum indicum	Acanthaceae	Lamiales	Angiosperm	Eranthemum	indicum	Myn	MAs	Sun	MAs
Eranthemum macrophyllum	Acanthaceae	Lamiales	Angiosperm	Eranthemum	macrophyllum	Myn	MAs	Sun	MAs
Eranthemum palatiferum	Acanthaceae	Lamiales	Angiosperm	Eranthemum	palatiferum	Myn	MAs	Sun	MAs
Eranthemum parishii	Acanthaceae	Lamiales	Angiosperm	Eranthemum	parishii	Lao	MAs	Sun	MAs
Eranthemum pulchellum	Acanthaceae	Lamiales	Angiosperm	Eranthemum	pulchellum	Lao	MAs	Sun	MAs
Eranthemum pulchellum	Acanthaceae	Lamiales	Angiosperm	Eranthemum	pulchellum	Myn	MAs	Sun	MAs
Eranthemum pulchellum	Acanthaceae	Lamiales	Angiosperm	Eranthemum	pulchellum	Sin	MAs	Sun	MAs
Eranthemum pulchellum	Acanthaceae	Lamiales	Angiosperm	Eranthemum	pulchellum	Tha	MAs	Sun	MAs
Eranthemum pulchellum	Acanthaceae	Lamiales	Angiosperm	Eranthemum	pulchellum	Ind	Sul	Wal	Sul
Eranthemum pulchellum	Acanthaceae	Lamiales	Angiosperm	Eranthemum	pulchellum	Phi	Phi	Wal	Phi
Eranthemum purpurascens	Acanthaceae	Lamiales	Angiosperm	Eranthemum	purpurascens	Lao	MAs	Sun	MAs
Eranthemum purpurascens	Acanthaceae	Lamiales	Angiosperm	Eranthemum	purpurascens	Myn	MAs	Sun	MAs
Eranthemum shweliense	Acanthaceae	Lamiales	Angiosperm	Eranthemum	shweliense	Myn	MAs	Sun	MAs
Eranthemum splendens	Acanthaceae	Lamiales	Angiosperm	Eranthemum	splendens	Myn	MAs	Sun	MAs
Eranthemum suffruticosum	Acanthaceae	Lamiales	Angiosperm	Eranthemum	suffruticosum	Myn	MAs	Sun	MAs
Eranthemum tapingense	Acanthaceae	Lamiales	Angiosperm	Eranthemum	tapingense	Myn	MAs	Sun	MAs
Eranthemum tetragonum	Acanthaceae	Lamiales	Angiosperm	Eranthemum	tetragonum	Myn	MAs	Sun	MAs
Eranthemum tetragonum	Acanthaceae	Lamiales	Angiosperm	Eranthemum	tetragonum	Tha	MAs	Sun	MAs
Eranthemum wardii	Acanthaceae	Lamiales	Angiosperm	Eranthemum	wardii	Myn	MAs	Sun	MAs
Eranthemum wattii	Acanthaceae	Lamiales	Angiosperm	Eranthemum	wattii	Sin	MAs	Sun	MAs
Filetia bracteosa	Acanthaceae	Lamiales	Angiosperm	Filetia	bracteosa	Mly	MAs	Sun	MAs
Filetia glabra	Acanthaceae	Lamiales	Angiosperm	Filetia	glabra	Mly	MAs	Sun	MAs
Filetia hirta	Acanthaceae	Lamiales	Angiosperm	Filetia	hirta	Mly	MAs	Sun	MAs
Filetia paniculata	Acanthaceae	Lamiales	Angiosperm	Filetia	paniculata	Mly	MAs	Sun	MAs
Filetia ridleyi	Acanthaceae	Lamiales	Angiosperm	Filetia	ridleyi	Mly	MAs	Sun	MAs
Filetia scortechinii	Acanthaceae	Lamiales	Angiosperm	Filetia	scortechinii	Mly	MAs	Sun	MAs
Graphandra procumbens	Acanthaceae	Lamiales	Angiosperm	Graphandra	procumbens	Tha	MAs	Sun	MAs
Graptophyllum excelsum	Acanthaceae	Lamiales	Angiosperm	Graptophyllum	excelsum	Aus	Aus	Sah	AU Cape York Peninsula
Graptophyllum excelsum	Acanthaceae	Lamiales	Angiosperm	Graptophyllum	excelsum	Aus	Aus	Sah	AU Central Queensland
Graptophyllum excelsum	Acanthaceae	Lamiales	Angiosperm	Graptophyllum	excelsum	Aus	Aus	Sah	AU Eastern Queensland
Graptophyllum gilliganii	Acanthaceae	Lamiales	Angiosperm	Graptophyllum	gilliganii	Ind/PNG	NGu	Sah	NGu
Graptophyllum ilicifolium	Acanthaceae	Lamiales	Angiosperm	Graptophyllum	ilicifolium	Aus	Aus	Sah	AU Eastern Queensland
Graptophyllum insularum	Acanthaceae	Lamiales	Angiosperm	Graptophyllum	insularum	Ind/PNG	NGu	Sah	NGu
Graptophyllum pictum	Acanthaceae	Lamiales	Angiosperm	Graptophyllum	pictum	Ind/PNG	NGu	Sah	NGu
Graptophyllum pictum	Acanthaceae	Lamiales	Angiosperm	Graptophyllum	pictum	Ind	Jav	Sun	Jav
Graptophyllum pictum	Acanthaceae	Lamiales	Angiosperm	Graptophyllum	pictum	Sin	MAs	Sun	MAs
Graptophyllum pictum	Acanthaceae	Lamiales	Angiosperm	Graptophyllum	pictum	Ind	Mlk	Wal	Mlk
Graptophyllum pictum	Acanthaceae	Lamiales	Angiosperm	Graptophyllum	pictum	Phi	Phi	Wal	Phi
Graptophyllum pubiflorum	Acanthaceae	Lamiales	Angiosperm	Graptophyllum	pubiflorum	Ind/PNG	NGu	Sah	NGu
Graptophyllum reticulatum	Acanthaceae	Lamiales	Angiosperm	Graptophyllum	reticulatum	Aus	Aus	Sah	AU Eastern Queensland
Graptophyllum spinigerum	Acanthaceae	Lamiales	Angiosperm	Graptophyllum	spinigerum	Aus	Aus	Sah	AU Arnhem Land
Graptophyllum spinigerum	Acanthaceae	Lamiales	Angiosperm	Graptophyllum	spinigerum	Aus	Aus	Sah	AU Atherton Plateau
Graptophyllum spinigerum	Acanthaceae	Lamiales	Angiosperm	Graptophyllum	spinigerum	Aus	Aus	Sah	AU Cape York Peninsula
Graptophyllum spinigerum	Acanthaceae	Lamiales	Angiosperm	Graptophyllum	spinigerum	Aus	Aus	Sah	AU Eastern Queensland
Graptophyllum spinigerum	Acanthaceae	Lamiales	Angiosperm	Graptophyllum	spinigerum	Aus	Aus	Sah	AU Kimberley Plateau
Graptophyllum spinigerum	Acanthaceae	Lamiales	Angiosperm	Graptophyllum	spinigerum	Ind/PNG	NGu	Sah	NGu
Gymnostachyum affine	Acanthaceae	Lamiales	Angiosperm	Gymnostachyum	affine	Phi	Phi	Wal	Phi
Gymnostachyum ceylanicum	Acanthaceae	Lamiales	Angiosperm	Gymnostachyum	ceylanicum	Mly	MAs	Sun	MAs
Gymnostachyum coriaceum	Acanthaceae	Lamiales	Angiosperm	Gymnostachyum	coriaceum	Tha	MAs	Sun	MAs
Gymnostachyum cumingianum	Acanthaceae	Lamiales	Angiosperm	Gymnostachyum	cumingianum	Phi	Phi	Wal	Phi
Gymnostachyum decurrens	Acanthaceae	Lamiales	Angiosperm	Gymnostachyum	decurrens	Mly	MAs	Sun	MAs
Gymnostachyum decurrens	Acanthaceae	Lamiales	Angiosperm	Gymnostachyum	decurrens	Tha	MAs	Sun	MAs
Gymnostachyum diversifolium	Acanthaceae	Lamiales	Angiosperm	Gymnostachyum	diversifolium	Mly	MAs	Sun	MAs
Gymnostachyum hirtistylum	Acanthaceae	Lamiales	Angiosperm	Gymnostachyum	hirtistylum	Mly	MAs	Sun	MAs
Gymnostachyum hirtum	Acanthaceae	Lamiales	Angiosperm	Gymnostachyum	hirtum	Mly	MAs	Sun	MAs
Gymnostachyum insulare	Acanthaceae	Lamiales	Angiosperm	Gymnostachyum	insulare	Mly	MAs	Sun	MAs
Gymnostachyum leptostachyum	Acanthaceae	Lamiales	Angiosperm	Gymnostachyum	leptostachyum	Myn	MAs	Sun	MAs
Gymnostachyum longispicatum	Acanthaceae	Lamiales	Angiosperm	Gymnostachyum	longispicatum	Phi	Phi	Wal	Phi
Gymnostachyum magis-nervatum	Acanthaceae	Lamiales	Angiosperm	Gymnostachyum	magis-nervatum	Mly	MAs	Sun	MAs
Gymnostachyum magnum	Acanthaceae	Lamiales	Angiosperm	Gymnostachyum	magnum	Mly	MAs	Sun	MAs
Gymnostachyum pallens	Acanthaceae	Lamiales	Angiosperm	Gymnostachyum	pallens	Mly	MAs	Sun	MAs
Gymnostachyum pictum	Acanthaceae	Lamiales	Angiosperm	Gymnostachyum	pictum	Phi	Phi	Wal	Phi
Gymnostachyum ridleyi	Acanthaceae	Lamiales	Angiosperm	Gymnostachyum	ridleyi	Mly	MAs	Sun	MAs
Gymnostachyum scortechinii	Acanthaceae	Lamiales	Angiosperm	Gymnostachyum	scortechinii	Mly	MAs	Sun	MAs
Gymnostachyum signatum	Acanthaceae	Lamiales	Angiosperm	Gymnostachyum	signatum	Lao	MAs	Sun	MAs
Gymnostachyum simplicicaule	Acanthaceae	Lamiales	Angiosperm	Gymnostachyum	simplicicaule	Mly	MAs	Sun	MAs
Gymnostachyum spiciforme	Acanthaceae	Lamiales	Angiosperm	Gymnostachyum	spiciforme	Phi	Phi	Wal	Phi
Gymnostachyum subacaule	Acanthaceae	Lamiales	Angiosperm	Gymnostachyum	subacaule	Ind/Mly/Bru	Bor	Sun	Bor
Gymnostachyum trichosepalum	Acanthaceae	Lamiales	Angiosperm	Gymnostachyum	trichosepalum	Phi	Phi	Wal	Phi
Gymnostachyum trilobum	Acanthaceae	Lamiales	Angiosperm	Gymnostachyum	trilobum	Myn	MAs	Sun	MAs
Harnieria hygrophiloides	Acanthaceae	Lamiales	Angiosperm	Harnieria	hygrophiloides	Aus	Aus	Sah	AU Atherton Plateau
Harnieria hygrophiloides	Acanthaceae	Lamiales	Angiosperm	Harnieria	hygrophiloides	Aus	Aus	Sah	AU Cape York Peninsula
Harnieria hygrophiloides	Acanthaceae	Lamiales	Angiosperm	Harnieria	hygrophiloides	Aus	Aus	Sah	AU Eastern Queensland
Harnieria hygrophiloides	Acanthaceae	Lamiales	Angiosperm	Harnieria	hygrophiloides	Aus	Aus	Sah	AU Southeastern
Harnieria kempeana	Acanthaceae	Lamiales	Angiosperm	Harnieria	kempeana	Aus	Aus	Sah	AU Eastern Desert
Harnieria kempeana	Acanthaceae	Lamiales	Angiosperm	Harnieria	kempeana	Aus	Aus	Sah	AU Great Sandy Desert Interzone
Harnieria kempeana	Acanthaceae	Lamiales	Angiosperm	Harnieria	kempeana	Aus	Aus	Sah	AU Western Desert
Hemigraphis alternata	Acanthaceae	Lamiales	Angiosperm	Hemigraphis	alternata	Ind/PNG	NGu	Sah	NGu
Hemigraphis alternata	Acanthaceae	Lamiales	Angiosperm	Hemigraphis	alternata	Ind	Jav	Sun	Jav
Hemigraphis alternata	Acanthaceae	Lamiales	Angiosperm	Hemigraphis	alternata	Sin	MAs	Sun	MAs
Hemigraphis alternata	Acanthaceae	Lamiales	Angiosperm	Hemigraphis	alternata	Ind	Mlk	Wal	Mlk
Hemigraphis alternata	Acanthaceae	Lamiales	Angiosperm	Hemigraphis	alternata	Phi	Phi	Wal	Phi
Hemigraphis bakeri	Acanthaceae	Lamiales	Angiosperm	Hemigraphis	bakeri	Phi	Phi	Wal	Phi
Hemigraphis baracatanense	Acanthaceae	Lamiales	Angiosperm	Hemigraphis	baracatanense	Phi	Phi	Wal	Phi
Hemigraphis blumeana	Acanthaceae	Lamiales	Angiosperm	Hemigraphis	blumeana	Phi	Phi	Wal	Phi
Hemigraphis ciliata	Acanthaceae	Lamiales	Angiosperm	Hemigraphis	ciliata	Aus	Aus	Sah	AU Atherton Plateau
Hemigraphis ciliata	Acanthaceae	Lamiales	Angiosperm	Hemigraphis	ciliata	Aus	Aus	Sah	AU Cape York Peninsula
Hemigraphis ciliata	Acanthaceae	Lamiales	Angiosperm	Hemigraphis	ciliata	Ind/PNG	NGu	Sah	NGu
Hemigraphis ciliata	Acanthaceae	Lamiales	Angiosperm	Hemigraphis	ciliata	Ind	Mlk	Wal	Mlk
Hemigraphis ciliata	Acanthaceae	Lamiales	Angiosperm	Hemigraphis	ciliata	Ind	Sul	Wal	Sul
Hemigraphis ciliata	Acanthaceae	Lamiales	Angiosperm	Hemigraphis	ciliata	Ind/Tim	LSI	Wal	LSI
Hemigraphis ciliata	Acanthaceae	Lamiales	Angiosperm	Hemigraphis	ciliata	Phi	Phi	Wal	Phi
Hemigraphis colorata	Acanthaceae	Lamiales	Angiosperm	Hemigraphis	colorata	Phi	Phi	Wal	Phi
Hemigraphis confinis	Acanthaceae	Lamiales	Angiosperm	Hemigraphis	confinis	Sin	MAs	Sun	MAs
Hemigraphis cumingiana	Acanthaceae	Lamiales	Angiosperm	Hemigraphis	cumingiana	Phi	Phi	Wal	Phi
Hemigraphis decipiens	Acanthaceae	Lamiales	Angiosperm	Hemigraphis	decipiens	Phi	Phi	Wal	Phi
Hemigraphis diversifolia	Acanthaceae	Lamiales	Angiosperm	Hemigraphis	diversifolia	Phi	Phi	Wal	Phi
Hemigraphis flava	Acanthaceae	Lamiales	Angiosperm	Hemigraphis	flava	Myn	MAs	Sun	MAs
Hemigraphis fruticulosa	Acanthaceae	Lamiales	Angiosperm	Hemigraphis	fruticulosa	Phi	Phi	Wal	Phi
Hemigraphis glaucescens	Acanthaceae	Lamiales	Angiosperm	Hemigraphis	glaucescens	Lao	MAs	Sun	MAs
Hemigraphis glaucescens	Acanthaceae	Lamiales	Angiosperm	Hemigraphis	glaucescens	Myn	MAs	Sun	MAs
Hemigraphis hirsutissima	Acanthaceae	Lamiales	Angiosperm	Hemigraphis	hirsutissima	Phi	Phi	Wal	Phi
Hemigraphis klossii	Acanthaceae	Lamiales	Angiosperm	Hemigraphis	klossii	Ind	Mlk	Wal	Mlk
Hemigraphis klossii	Acanthaceae	Lamiales	Angiosperm	Hemigraphis	klossii	Phi	Phi	Wal	Phi
Hemigraphis longipetiolata	Acanthaceae	Lamiales	Angiosperm	Hemigraphis	longipetiolata	Phi	Phi	Wal	Phi
Hemigraphis luzona	Acanthaceae	Lamiales	Angiosperm	Hemigraphis	luzona	Phi	Phi	Wal	Phi
Hemigraphis mediocris	Acanthaceae	Lamiales	Angiosperm	Hemigraphis	mediocris	Phi	Phi	Wal	Phi
Hemigraphis pachyphylla	Acanthaceae	Lamiales	Angiosperm	Hemigraphis	pachyphylla	Phi	Phi	Wal	Phi
Hemigraphis repanda	Acanthaceae	Lamiales	Angiosperm	Hemigraphis	repanda	Ind/PNG	NGu	Sah	NGu
Hemigraphis repanda	Acanthaceae	Lamiales	Angiosperm	Hemigraphis	repanda	Sin	MAs	Sun	MAs
Hemigraphis reptans	Acanthaceae	Lamiales	Angiosperm	Hemigraphis	reptans	Ind/PNG	NGu	Sah	NGu
Hemigraphis reptans	Acanthaceae	Lamiales	Angiosperm	Hemigraphis	reptans	Ind	Jav	Sun	Jav
Hemigraphis reptans	Acanthaceae	Lamiales	Angiosperm	Hemigraphis	reptans	Sin	MAs	Sun	MAs
Hemigraphis reptans	Acanthaceae	Lamiales	Angiosperm	Hemigraphis	reptans	Ind	Mlk	Wal	Mlk
Hemigraphis reptans	Acanthaceae	Lamiales	Angiosperm	Hemigraphis	reptans	Ind	Sul	Wal	Sul
Hemigraphis reptans	Acanthaceae	Lamiales	Angiosperm	Hemigraphis	reptans	Phi	Phi	Wal	Phi
Hemigraphis rhytiphylla	Acanthaceae	Lamiales	Angiosperm	Hemigraphis	rhytiphylla	Phi	Phi	Wal	Phi
Hemigraphis setosa	Acanthaceae	Lamiales	Angiosperm	Hemigraphis	setosa	Phi	Phi	Wal	Phi
Hemigraphis viridis	Acanthaceae	Lamiales	Angiosperm	Hemigraphis	viridis	Phi	Phi	Wal	Phi
Hemigraphis zwickeyae	Acanthaceae	Lamiales	Angiosperm	Hemigraphis	zwickeyae	Phi	Phi	Wal	Phi
Hygrophila angustifolia	Acanthaceae	Lamiales	Angiosperm	Hygrophila	angustifolia	Aus	Aus	Sah	AU Arnhem Land
Hygrophila angustifolia	Acanthaceae	Lamiales	Angiosperm	Hygrophila	angustifolia	Aus	Aus	Sah	AU Atherton Plateau
Hygrophila angustifolia	Acanthaceae	Lamiales	Angiosperm	Hygrophila	angustifolia	Aus	Aus	Sah	AU Cape York Peninsula
Hygrophila angustifolia	Acanthaceae	Lamiales	Angiosperm	Hygrophila	angustifolia	Aus	Aus	Sah	AU Central Desert
Hygrophila angustifolia	Acanthaceae	Lamiales	Angiosperm	Hygrophila	angustifolia	Aus	Aus	Sah	AU Central Queensland
Hygrophila angustifolia	Acanthaceae	Lamiales	Angiosperm	Hygrophila	angustifolia	Aus	Aus	Sah	AU Eastern Queensland
Hygrophila angustifolia	Acanthaceae	Lamiales	Angiosperm	Hygrophila	angustifolia	Aus	Aus	Sah	AU Kimberley Plateau
Hygrophila angustifolia	Acanthaceae	Lamiales	Angiosperm	Hygrophila	angustifolia	Aus	Aus	Sah	AU Southeastern
Hygrophila auriculata	Acanthaceae	Lamiales	Angiosperm	Hygrophila	auriculata	Mly	MAs	Sun	MAs
Hygrophila auriculata	Acanthaceae	Lamiales	Angiosperm	Hygrophila	auriculata	Myn	MAs	Sun	MAs
Hygrophila auriculata	Acanthaceae	Lamiales	Angiosperm	Hygrophila	auriculata	Sin	MAs	Sun	MAs
Hygrophila biplicata	Acanthaceae	Lamiales	Angiosperm	Hygrophila	biplicata	Myn	MAs	Sun	MAs
Hygrophila corymbosa	Acanthaceae	Lamiales	Angiosperm	Hygrophila	corymbosa	Myn	MAs	Sun	MAs
Hygrophila corymbosa	Acanthaceae	Lamiales	Angiosperm	Hygrophila	corymbosa	Phi	Phi	Wal	Phi
Hygrophila erecta	Acanthaceae	Lamiales	Angiosperm	Hygrophila	erecta	Lao	MAs	Sun	MAs
Hygrophila erecta	Acanthaceae	Lamiales	Angiosperm	Hygrophila	erecta	Mly	MAs	Sun	MAs
Hygrophila erecta	Acanthaceae	Lamiales	Angiosperm	Hygrophila	erecta	Ind	Sul	Wal	Sul
Hygrophila erecta	Acanthaceae	Lamiales	Angiosperm	Hygrophila	erecta	Phi	Phi	Wal	Phi
Hygrophila incana	Acanthaceae	Lamiales	Angiosperm	Hygrophila	incana	Lao	Mas	Sun	Mas
Hygrophila phlomoides	Acanthaceae	Lamiales	Angiosperm	Hygrophila	phlomoides	Ind/PNG	NGu	Sah	NGu
Hygrophila phlomoides	Acanthaceae	Lamiales	Angiosperm	Hygrophila	phlomoides	Cam	MAs	Sun	MAs
Hygrophila phlomoides	Acanthaceae	Lamiales	Angiosperm	Hygrophila	phlomoides	Lao	MAs	Sun	MAs
Hygrophila phlomoides	Acanthaceae	Lamiales	Angiosperm	Hygrophila	phlomoides	Mly	MAs	Sun	MAs
Hygrophila phlomoides	Acanthaceae	Lamiales	Angiosperm	Hygrophila	phlomoides	Sin	MAs	Sun	MAs
Hygrophila phlomoides	Acanthaceae	Lamiales	Angiosperm	Hygrophila	phlomoides	Vie	MAs	Sun	MAs
Hygrophila phlomoides	Acanthaceae	Lamiales	Angiosperm	Hygrophila	phlomoides	Phi	Phi	Wal	Phi
Hygrophila polysperma	Acanthaceae	Lamiales	Angiosperm	Hygrophila	polysperma	Lao	MAs	Sun	MAs
Hygrophila polysperma	Acanthaceae	Lamiales	Angiosperm	Hygrophila	polysperma	Mly	MAs	Sun	MAs
Hygrophila polysperma	Acanthaceae	Lamiales	Angiosperm	Hygrophila	polysperma	Myn	MAs	Sun	MAs
Hygrophila ringens	Acanthaceae	Lamiales	Angiosperm	Hygrophila	ringens	Ind/PNG	NGu	Sah	NGu
Hygrophila ringens	Acanthaceae	Lamiales	Angiosperm	Hygrophila	ringens	Cam	MAs	Sun	MAs
Hygrophila ringens	Acanthaceae	Lamiales	Angiosperm	Hygrophila	ringens	Lao	MAs	Sun	MAs
Hygrophila ringens	Acanthaceae	Lamiales	Angiosperm	Hygrophila	ringens	Mly	MAs	Sun	MAs
Hygrophila ringens	Acanthaceae	Lamiales	Angiosperm	Hygrophila	ringens	Myn	MAs	Sun	MAs
Hygrophila ringens	Acanthaceae	Lamiales	Angiosperm	Hygrophila	ringens	Sin	MAs	Sun	MAs
Hygrophila ringens	Acanthaceae	Lamiales	Angiosperm	Hygrophila	ringens	Tha	MAs	Sun	MAs
Hygrophila ringens	Acanthaceae	Lamiales	Angiosperm	Hygrophila	ringens	Vie	MAs	Sun	MAs
Hygrophila ringens	Acanthaceae	Lamiales	Angiosperm	Hygrophila	ringens	Ind	Mlk	Wal	Mlk
Hygrophila ringens	Acanthaceae	Lamiales	Angiosperm	Hygrophila	ringens	Ind	Sul	Wal	Sul
Hygrophila ringens	Acanthaceae	Lamiales	Angiosperm	Hygrophila	ringens	Ind/Tim	LSI	Wal	LSI
Hygrophila ringens	Acanthaceae	Lamiales	Angiosperm	Hygrophila	ringens	Phi	Phi	Wal	Phi
Hygrophila stricta	Acanthaceae	Lamiales	Angiosperm	Hygrophila	stricta	Cam	MAs	Sun	MAs
Hygrophila stricta	Acanthaceae	Lamiales	Angiosperm	Hygrophila	stricta	Mly	MAs	Sun	MAs
Hygrophila stricta	Acanthaceae	Lamiales	Angiosperm	Hygrophila	stricta	Myn	MAs	Sun	MAs
Hygrophila stricta	Acanthaceae	Lamiales	Angiosperm	Hygrophila	stricta	Vie	MAs	Sun	MAs
Hygrophila stricta	Acanthaceae	Lamiales	Angiosperm	Hygrophila	stricta	Ind	Mlk	Wal	Mlk
Hygrophila stricta	Acanthaceae	Lamiales	Angiosperm	Hygrophila	stricta	Ind	Sul	Wal	Sul
Hygrophila stricta	Acanthaceae	Lamiales	Angiosperm	Hygrophila	stricta	Phi	Phi	Wal	Phi
Hypoestes addisoniensis	Acanthaceae	Lamiales	Angiosperm	Hypoestes	addisoniensis	Phi	Phi	Wal	Phi
Hypoestes aristata	Acanthaceae	Lamiales	Angiosperm	Hypoestes	aristata	Aus	Aus	Sah	AU Adelaide
Hypoestes aristata	Acanthaceae	Lamiales	Angiosperm	Hypoestes	aristata	Aus	Aus	Sah	AU Eastern Queensland
Hypoestes aristata	Acanthaceae	Lamiales	Angiosperm	Hypoestes	aristata	Aus	Aus	Sah	AU Eyre Peninsula
Hypoestes aristata	Acanthaceae	Lamiales	Angiosperm	Hypoestes	aristata	Aus	Aus	Sah	AU Southeastern
Hypoestes aristata	Acanthaceae	Lamiales	Angiosperm	Hypoestes	aristata	Aus	Aus	Sah	AU Victoria
Hypoestes axillaris	Acanthaceae	Lamiales	Angiosperm	Hypoestes	axillaris	Phi	Phi	Wal	Phi
Hypoestes cinerea	Acanthaceae	Lamiales	Angiosperm	Hypoestes	cinerea	Phi	Phi	Wal	Phi
Hypoestes confertiflora	Acanthaceae	Lamiales	Angiosperm	Hypoestes	confertiflora	Phi	Phi	Wal	Phi
Hypoestes cumingiana	Acanthaceae	Lamiales	Angiosperm	Hypoestes	cumingiana	Phi	Phi	Wal	Phi
Hypoestes floribunda	Acanthaceae	Lamiales	Angiosperm	Hypoestes	floribunda	Aus	Aus	Sah	AU Arnhem Land
Hypoestes floribunda	Acanthaceae	Lamiales	Angiosperm	Hypoestes	floribunda	Aus	Aus	Sah	AU Atherton Plateau
Hypoestes floribunda	Acanthaceae	Lamiales	Angiosperm	Hypoestes	floribunda	Aus	Aus	Sah	AU Cape York Peninsula
Hypoestes floribunda	Acanthaceae	Lamiales	Angiosperm	Hypoestes	floribunda	Aus	Aus	Sah	AU Central Desert
Hypoestes floribunda	Acanthaceae	Lamiales	Angiosperm	Hypoestes	floribunda	Aus	Aus	Sah	AU Central Queensland
Hypoestes floribunda	Acanthaceae	Lamiales	Angiosperm	Hypoestes	floribunda	Aus	Aus	Sah	AU Eastern Desert
Hypoestes floribunda	Acanthaceae	Lamiales	Angiosperm	Hypoestes	floribunda	Aus	Aus	Sah	AU Eastern Queensland
Hypoestes floribunda	Acanthaceae	Lamiales	Angiosperm	Hypoestes	floribunda	Aus	Aus	Sah	AU Kimberley Plateau
Hypoestes floribunda	Acanthaceae	Lamiales	Angiosperm	Hypoestes	floribunda	Aus	Aus	Sah	AU Southeastern
Hypoestes floribunda	Acanthaceae	Lamiales	Angiosperm	Hypoestes	floribunda	Phi	Phi	Wal	Phi
Hypoestes halconensis	Acanthaceae	Lamiales	Angiosperm	Hypoestes	halconensis	Phi	Phi	Wal	Phi
Hypoestes malaccensis	Acanthaceae	Lamiales	Angiosperm	Hypoestes	malaccensis	Phi	Phi	Wal	Phi
Hypoestes merrillii	Acanthaceae	Lamiales	Angiosperm	Hypoestes	merrillii	Phi	Phi	Wal	Phi
Hypoestes mindorensis	Acanthaceae	Lamiales	Angiosperm	Hypoestes	mindorensis	Phi	Phi	Wal	Phi
Hypoestes palawanensis	Acanthaceae	Lamiales	Angiosperm	Hypoestes	palawanensis	Phi	Phi	Wal	Phi
Hypoestes psilochlamys	Acanthaceae	Lamiales	Angiosperm	Hypoestes	psilochlamys	Phi	Phi	Wal	Phi
Hypoestes pulgarensis	Acanthaceae	Lamiales	Angiosperm	Hypoestes	pulgarensis	Phi	Phi	Wal	Phi
Hypoestes sparsiflora	Acanthaceae	Lamiales	Angiosperm	Hypoestes	sparsiflora	Aus	Aus	Sah	AU Kimberley Plateau
Hypoestes subcapitata	Acanthaceae	Lamiales	Angiosperm	Hypoestes	subcapitata	Phi	Phi	Wal	Phi
Hypoestes tenuis	Acanthaceae	Lamiales	Angiosperm	Hypoestes	tenuis	Phi	Phi	Wal	Phi
Hypoestes triflora	Acanthaceae	Lamiales	Angiosperm	Hypoestes	triflora	Myn	MAs	Sun	MAs
Hypoestes vidalii	Acanthaceae	Lamiales	Angiosperm	Hypoestes	vidalii	Phi	Phi	Wal	Phi
Isoglossa eranthemoides	Acanthaceae	Lamiales	Angiosperm	Isoglossa	eranthemoides	Aus	Aus	Sah	AU Southeastern
Jadunia biroi	Acanthaceae	Lamiales	Angiosperm	Jadunia	biroi	Ind/PNG	NGu	Sah	NGu
Justicia acuminata	Acanthaceae	Lamiales	Angiosperm	Justicia	acuminata	Myn	MAs	Sun	MAs
Justicia addisoniensis	Acanthaceae	Lamiales	Angiosperm	Justicia	addisoniensis	Phi	Phi	Wal	Phi
Justicia adhatoda	Acanthaceae	Lamiales	Angiosperm	Justicia	adhatoda	Lao	MAs	Sun	MAs
Justicia adhatoda	Acanthaceae	Lamiales	Angiosperm	Justicia	adhatoda	Myn	MAs	Sun	MAs
Justicia adhatoda	Acanthaceae	Lamiales	Angiosperm	Justicia	adhatoda	Tha	MAs	Sun	MAs
Justicia andrographioides	Acanthaceae	Lamiales	Angiosperm	Justicia	andrographioides	Myn	MAs	Sun	MAs
Justicia argyrostachya	Acanthaceae	Lamiales	Angiosperm	Justicia	argyrostachya	Myn	MAs	Sun	MAs
Justicia betonica	Acanthaceae	Lamiales	Angiosperm	Justicia	betonica	Ind/PNG	NGu	Sah	NGu
Justicia betonica	Acanthaceae	Lamiales	Angiosperm	Justicia	betonica	Mly	MAs	Sun	MAs
Justicia betonica	Acanthaceae	Lamiales	Angiosperm	Justicia	betonica	Myn	MAs	Sun	MAs
Justicia betonica	Acanthaceae	Lamiales	Angiosperm	Justicia	betonica	Sin	MAs	Sun	MAs
Justicia brandegeeana	Acanthaceae	Lamiales	Angiosperm	Justicia	brandegeeana	Sin	MAs	Sun	MAs
Justicia brandegeeana	Acanthaceae	Lamiales	Angiosperm	Justicia	brandegeeana	Phi	Phi	Wal	Phi
Justicia brasiliana	Acanthaceae	Lamiales	Angiosperm	Justicia	brasiliana	Phi	Phi	Wal	Phi
Justicia calcarata	Acanthaceae	Lamiales	Angiosperm	Justicia	calcarata	Myn	MAs	Sun	MAs
Justicia carnea	Acanthaceae	Lamiales	Angiosperm	Justicia	carnea	Sin	MAs	Sun	MAs
Justicia comata	Acanthaceae	Lamiales	Angiosperm	Justicia	comata	Tha	MAs	Sun	MAs
Justicia dasycarpa	Acanthaceae	Lamiales	Angiosperm	Justicia	dasycarpa	Myn	MAs	Sun	MAs
Justicia decurrens	Acanthaceae	Lamiales	Angiosperm	Justicia	decurrens	Tha	MAs	Sun	MAs
Justicia diffusa	Acanthaceae	Lamiales	Angiosperm	Justicia	diffusa	Myn	MAs	Sun	MAs
Justicia diffusa	Acanthaceae	Lamiales	Angiosperm	Justicia	diffusa	Tha	MAs	Sun	MAs
Justicia dispar	Acanthaceae	Lamiales	Angiosperm	Justicia	dispar	Phi	Phi	Wal	Phi
Justicia gendarussa	Acanthaceae	Lamiales	Angiosperm	Justicia	gendarussa	Ind/PNG	NGu	Sah	NGu
Justicia gendarussa	Acanthaceae	Lamiales	Angiosperm	Justicia	gendarussa	Ind	Sum	Sun	Sum
Justicia gendarussa	Acanthaceae	Lamiales	Angiosperm	Justicia	gendarussa	Ind/Mly/Bru	Bor	Sun	Bor
Justicia gendarussa	Acanthaceae	Lamiales	Angiosperm	Justicia	gendarussa	Lao	MAs	Sun	MAs
Justicia gendarussa	Acanthaceae	Lamiales	Angiosperm	Justicia	gendarussa	Mly	MAs	Sun	MAs
Justicia gendarussa	Acanthaceae	Lamiales	Angiosperm	Justicia	gendarussa	Myn	MAs	Sun	MAs
Justicia gendarussa	Acanthaceae	Lamiales	Angiosperm	Justicia	gendarussa	Sin	MAs	Sun	MAs
Justicia gendarussa	Acanthaceae	Lamiales	Angiosperm	Justicia	gendarussa	Ind	Mlk	Wal	Mlk
Justicia gendarussa	Acanthaceae	Lamiales	Angiosperm	Justicia	gendarussa	Ind	Sul	Wal	Sul
Justicia gendarussa	Acanthaceae	Lamiales	Angiosperm	Justicia	gendarussa	Ind/Tim	LSI	Wal	LSI
Justicia gendarussa	Acanthaceae	Lamiales	Angiosperm	Justicia	gendarussa	Phi	Phi	Wal	Phi
Justicia geoffrayi	Acanthaceae	Lamiales	Angiosperm	Justicia	geoffrayi	Cam	MAs	Sun	MAs
Justicia geoffrayi	Acanthaceae	Lamiales	Angiosperm	Justicia	geoffrayi	Tha	MAs	Sun	MAs
Justicia geoffrayi	Acanthaceae	Lamiales	Angiosperm	Justicia	geoffrayi	Vie	MAs	Sun	MAs
Justicia glabra	Acanthaceae	Lamiales	Angiosperm	Justicia	glabra	Myn	MAs	Sun	MAs
Justicia glabra	Acanthaceae	Lamiales	Angiosperm	Justicia	glabra	Phi	Phi	Wal	Phi
Justicia grandifolia	Acanthaceae	Lamiales	Angiosperm	Justicia	grandifolia	Myn	MAs	Sun	MAs
Justicia grossa	Acanthaceae	Lamiales	Angiosperm	Justicia	grossa	Lao	MAs	Sun	MAs
Justicia grossa	Acanthaceae	Lamiales	Angiosperm	Justicia	grossa	Myn	MAs	Sun	MAs
Justicia guttata	Acanthaceae	Lamiales	Angiosperm	Justicia	guttata	Sin	MAs	Sun	MAs
Justicia kampotiana	Acanthaceae	Lamiales	Angiosperm	Justicia	kampotiana	Cam	MAs	Sun	MAs
Justicia kampotiana	Acanthaceae	Lamiales	Angiosperm	Justicia	kampotiana	Vie	MAs	Sun	MAs
Justicia lancifolia	Acanthaceae	Lamiales	Angiosperm	Justicia	lancifolia	Mly	MAs	Sun	MAs
Justicia laotica	Acanthaceae	Lamiales	Angiosperm	Justicia	laotica	Lao	Mas	Sun	Mas
Justicia loheri	Acanthaceae	Lamiales	Angiosperm	Justicia	loheri	Phi	Phi	Wal	Phi
Justicia luzonensis	Acanthaceae	Lamiales	Angiosperm	Justicia	luzonensis	Phi	Phi	Wal	Phi
Justicia modesta	Acanthaceae	Lamiales	Angiosperm	Justicia	modesta	Tha	MAs	Sun	MAs
Justicia neesiana	Acanthaceae	Lamiales	Angiosperm	Justicia	neesiana	Ind/PNG	NGu	Sah	NGu
Justicia neesiana	Acanthaceae	Lamiales	Angiosperm	Justicia	neesiana	Tha	MAs	Sun	MAs
Justicia neolinearifolia	Acanthaceae	Lamiales	Angiosperm	Justicia	neolinearifolia	Lao	MAs	Sun	MAs
Justicia patentiflora	Acanthaceae	Lamiales	Angiosperm	Justicia	patentiflora	Myn	MAs	Sun	MAs
Justicia procumbens	Acanthaceae	Lamiales	Angiosperm	Justicia	procumbens	Lao	MAs	Sun	MAs
Justicia procumbens	Acanthaceae	Lamiales	Angiosperm	Justicia	procumbens	Mly	MAs	Sun	MAs
Justicia procumbens	Acanthaceae	Lamiales	Angiosperm	Justicia	procumbens	Myn	MAs	Sun	MAs
Justicia procumbens	Acanthaceae	Lamiales	Angiosperm	Justicia	procumbens	Ind/Tim	LSI	Wal	LSI
Justicia procumbens	Acanthaceae	Lamiales	Angiosperm	Justicia	procumbens	Phi	Phi	Wal	Phi
Justicia prominens	Acanthaceae	Lamiales	Angiosperm	Justicia	prominens	Lao	Mas	Sun	Mas
Justicia pulgarensis	Acanthaceae	Lamiales	Angiosperm	Justicia	pulgarensis	Phi	Phi	Wal	Phi
Justicia quadrifaria	Acanthaceae	Lamiales	Angiosperm	Justicia	quadrifaria	Lao	MAs	Sun	MAs
Justicia quadrifaria	Acanthaceae	Lamiales	Angiosperm	Justicia	quadrifaria	Mly	MAs	Sun	MAs
Justicia quadrifaria	Acanthaceae	Lamiales	Angiosperm	Justicia	quadrifaria	Sin	MAs	Sun	MAs
Justicia quadrifaria	Acanthaceae	Lamiales	Angiosperm	Justicia	quadrifaria	Phi	Phi	Wal	Phi
Justicia rhodantha	Acanthaceae	Lamiales	Angiosperm	Justicia	rhodantha	Lao	Mas	Sun	Mas
Justicia sumatrana	Acanthaceae	Lamiales	Angiosperm	Justicia	sumatrana	Mly	MAs	Sun	MAs
Justicia tenuis	Acanthaceae	Lamiales	Angiosperm	Justicia	tenuis	Phi	Phi	Wal	Phi
Justicia vasculosa	Acanthaceae	Lamiales	Angiosperm	Justicia	vasculosa	Lao	Mas	Sun	Mas
Justicia vasculosa	Acanthaceae	Lamiales	Angiosperm	Justicia	vasculosa	Sin	MAs	Sun	MAs
Justicia ventricosa	Acanthaceae	Lamiales	Angiosperm	Justicia	ventricosa	Cam	MAs	Sun	MAs
Justicia ventricosa	Acanthaceae	Lamiales	Angiosperm	Justicia	ventricosa	Lao	MAs	Sun	MAs
Justicia ventricosa	Acanthaceae	Lamiales	Angiosperm	Justicia	ventricosa	Myn	MAs	Sun	MAs
Justicia ventricosa	Acanthaceae	Lamiales	Angiosperm	Justicia	ventricosa	Vie	MAs	Sun	MAs
Justicia vidalii	Acanthaceae	Lamiales	Angiosperm	Justicia	vidalii	Phi	Phi	Wal	Phi
Justicia virgata	Acanthaceae	Lamiales	Angiosperm	Justicia	virgata	Myn	MAs	Sun	MAs
Justicia zollingeriana	Acanthaceae	Lamiales	Angiosperm	Justicia	zollingeriana	Ind/PNG	NGu	Sah	NGu
Leda densiflora	Acanthaceae	Lamiales	Angiosperm	Leda	densiflora	Mly	MAs	Sun	MAs
Leda subcordata	Acanthaceae	Lamiales	Angiosperm	Leda	subcordata	Mly	MAs	Sun	MAs
Lepidagathis amaranthoides	Acanthaceae	Lamiales	Angiosperm	Lepidagathis	amaranthoides	Phi	Phi	Wal	Phi
Lepidagathis cinerea	Acanthaceae	Lamiales	Angiosperm	Lepidagathis	cinerea	Phi	Phi	Wal	Phi
Lepidagathis clarkei	Acanthaceae	Lamiales	Angiosperm	Lepidagathis	clarkei	Phi	Phi	Wal	Phi
Lepidagathis dispar	Acanthaceae	Lamiales	Angiosperm	Lepidagathis	dispar	Phi	Phi	Wal	Phi
Lepidagathis fasciculata	Acanthaceae	Lamiales	Angiosperm	Lepidagathis	fasciculata	Myn	MAs	Sun	MAs
Lepidagathis humifusa	Acanthaceae	Lamiales	Angiosperm	Lepidagathis	humifusa	Ind	LSI	Wal	LSI
Lepidagathis humilis	Acanthaceae	Lamiales	Angiosperm	Lepidagathis	humilis	Phi	Phi	Wal	Phi
Lepidagathis inaequalis	Acanthaceae	Lamiales	Angiosperm	Lepidagathis	inaequalis	Phi	Phi	Wal	Phi
Lepidagathis incurva	Acanthaceae	Lamiales	Angiosperm	Lepidagathis	incurva	Ind/PNG	NGu	Sah	NGu
Lepidagathis incurva	Acanthaceae	Lamiales	Angiosperm	Lepidagathis	incurva	Cam	MAs	Sun	MAs
Lepidagathis incurva	Acanthaceae	Lamiales	Angiosperm	Lepidagathis	incurva	Lao	MAs	Sun	MAs
Lepidagathis incurva	Acanthaceae	Lamiales	Angiosperm	Lepidagathis	incurva	Mly	MAs	Sun	MAs
Lepidagathis incurva	Acanthaceae	Lamiales	Angiosperm	Lepidagathis	incurva	Myn	MAs	Sun	MAs
Lepidagathis incurva	Acanthaceae	Lamiales	Angiosperm	Lepidagathis	incurva	Tha	MAs	Sun	MAs
Lepidagathis incurva	Acanthaceae	Lamiales	Angiosperm	Lepidagathis	incurva	Vie	MAs	Sun	MAs
Lepidagathis incurva	Acanthaceae	Lamiales	Angiosperm	Lepidagathis	incurva	Phi	Phi	Wal	Phi
Lepidagathis laxa	Acanthaceae	Lamiales	Angiosperm	Lepidagathis	laxa	Phi	Phi	Wal	Phi
Lepidagathis macgregorii	Acanthaceae	Lamiales	Angiosperm	Lepidagathis	macgregorii	Phi	Phi	Wal	Phi
Lepidagathis microphylla	Acanthaceae	Lamiales	Angiosperm	Lepidagathis	microphylla	Phi	Phi	Wal	Phi
Lepidagathis mindorensis	Acanthaceae	Lamiales	Angiosperm	Lepidagathis	mindorensis	Phi	Phi	Wal	Phi
Lepidagathis palawanensis	Acanthaceae	Lamiales	Angiosperm	Lepidagathis	palawanensis	Phi	Phi	Wal	Phi
Lepidagathis psilantha	Acanthaceae	Lamiales	Angiosperm	Lepidagathis	psilantha	Phi	Phi	Wal	Phi
Lepidagathis royenii	Acanthaceae	Lamiales	Angiosperm	Lepidagathis	royenii	Aus	Aus	Sah	AU Cape York Peninsula
Lepidagathis royenii	Acanthaceae	Lamiales	Angiosperm	Lepidagathis	royenii	Ind/PNG	NGu	Sah	NGu
Lepidagathis secunda	Acanthaceae	Lamiales	Angiosperm	Lepidagathis	secunda	Phi	Phi	Wal	Phi
Lepidagathis spicifer	Acanthaceae	Lamiales	Angiosperm	Lepidagathis	spicifer	Phi	Phi	Wal	Phi
Lepidagathis subglabra	Acanthaceae	Lamiales	Angiosperm	Lepidagathis	subglabra	Phi	Phi	Wal	Phi
Lepidagathis subinterrupta	Acanthaceae	Lamiales	Angiosperm	Lepidagathis	subinterrupta	Phi	Phi	Wal	Phi
Lepidagathis tenuis	Acanthaceae	Lamiales	Angiosperm	Lepidagathis	tenuis	Phi	Phi	Wal	Phi
Leptostachya wallichii	Acanthaceae	Lamiales	Angiosperm	Leptostachya	wallichii	Lao	MAs	Sun	MAs
Megaskepasma erythrochlamys	Acanthaceae	Lamiales	Angiosperm	Megaskepasma	erythrochlamys	Sin	MAs	Sun	MAs
Nelsonia campestris	Acanthaceae	Lamiales	Angiosperm	Nelsonia	campestris	Aus	Aus	Sah	AU Arnhem Land
Nelsonia campestris	Acanthaceae	Lamiales	Angiosperm	Nelsonia	campestris	Aus	Aus	Sah	AU Atherton Plateau
Nelsonia campestris	Acanthaceae	Lamiales	Angiosperm	Nelsonia	campestris	Aus	Aus	Sah	AU Cape York Peninsula
Nelsonia campestris	Acanthaceae	Lamiales	Angiosperm	Nelsonia	campestris	Aus	Aus	Sah	AU Central Desert
Nelsonia campestris	Acanthaceae	Lamiales	Angiosperm	Nelsonia	campestris	Aus	Aus	Sah	AU Central Queensland
Nelsonia campestris	Acanthaceae	Lamiales	Angiosperm	Nelsonia	campestris	Aus	Aus	Sah	AU Eastern Queensland
Nelsonia campestris	Acanthaceae	Lamiales	Angiosperm	Nelsonia	campestris	Aus	Aus	Sah	AU Kimberley Plateau
Nelsonia canescens	Acanthaceae	Lamiales	Angiosperm	Nelsonia	canescens	Ind/PNG	NGu	Sah	NGu
Nelsonia canescens	Acanthaceae	Lamiales	Angiosperm	Nelsonia	canescens	Cam	MAs	Sun	MAs
Nelsonia canescens	Acanthaceae	Lamiales	Angiosperm	Nelsonia	canescens	Ind	Jav	Sun	Jav
Nelsonia canescens	Acanthaceae	Lamiales	Angiosperm	Nelsonia	canescens	Ind/Mly/Bru	Bor	Sun	Bor
Nelsonia canescens	Acanthaceae	Lamiales	Angiosperm	Nelsonia	canescens	Lao	MAs	Sun	MAs
Nelsonia canescens	Acanthaceae	Lamiales	Angiosperm	Nelsonia	canescens	Mly	MAs	Sun	MAs
Nelsonia canescens	Acanthaceae	Lamiales	Angiosperm	Nelsonia	canescens	Myn	MAs	Sun	MAs
Nelsonia canescens	Acanthaceae	Lamiales	Angiosperm	Nelsonia	canescens	Vie	MAs	Sun	MAs
Nelsonia canescens	Acanthaceae	Lamiales	Angiosperm	Nelsonia	canescens	Phi	Phi	Wal	Phi
Neuracanthus tetragonostachyus	Acanthaceae	Lamiales	Angiosperm	Neuracanthus	tetragonostachyus	Lao	Mas	Sun	Mas
Neuracanthus tetragonostachyus	Acanthaceae	Lamiales	Angiosperm	Neuracanthus	tetragonostachyus	Myn	MAs	Sun	MAs
Nomaphila episcopalis	Acanthaceae	Lamiales	Angiosperm	Nomaphila	episcopalis	Cam	MAs	Sun	MAs
Nomaphila episcopalis	Acanthaceae	Lamiales	Angiosperm	Nomaphila	episcopalis	Vie	MAs	Sun	MAs
Odontonema bracteolatum	Acanthaceae	Lamiales	Angiosperm	Odontonema	bracteolatum	Tha	MAs	Sun	MAs
Odontonema cuspidatum	Acanthaceae	Lamiales	Angiosperm	Odontonema	cuspidatum	Sin	MAs	Sun	MAs
Odontonema tubaeforme	Acanthaceae	Lamiales	Angiosperm	Odontonema	tubaeforme	Phi	Phi	Wal	Phi
Ophiorrhiziphyllon macrobotryum	Acanthaceae	Lamiales	Angiosperm	Ophiorrhiziphyllon	macrobotryum	Lao	MAs	Sun	MAs
Ophiorrhiziphyllon macrobotryum	Acanthaceae	Lamiales	Angiosperm	Ophiorrhiziphyllon	macrobotryum	Myn	MAs	Sun	MAs
Pachystachys coccinea	Acanthaceae	Lamiales	Angiosperm	Pachystachys	coccinea	Sin	MAs	Sun	MAs
Pachystachys coccinea	Acanthaceae	Lamiales	Angiosperm	Pachystachys	coccinea	Phi	Phi	Wal	Phi
Pachystachys lutea	Acanthaceae	Lamiales	Angiosperm	Pachystachys	lutea	Sin	MAs	Sun	MAs
Pachystachys spicata	Acanthaceae	Lamiales	Angiosperm	Pachystachys	spicata	Sin	MAs	Sun	MAs
Pachystrobilus involucratus	Acanthaceae	Lamiales	Angiosperm	Pachystrobilus	involucratus	Ind	Jav	Sun	Jav
Pachystrobilus involucratus	Acanthaceae	Lamiales	Angiosperm	Pachystrobilus	involucratus	Ind/Mly/Bru	Bor	Sun	Bor
Pachystrobilus involucratus	Acanthaceae	Lamiales	Angiosperm	Pachystrobilus	involucratus	Lao	MAs	Sun	MAs
Pararuellia nudispica	Acanthaceae	Lamiales	Angiosperm	Pararuellia	nudispica	Phi	Phi	Wal	Phi
Pararuellia sumatrensis	Acanthaceae	Lamiales	Angiosperm	Pararuellia	sumatrensis	Mly	MAs	Sun	MAs
Peristrophe acuminata	Acanthaceae	Lamiales	Angiosperm	Peristrophe	acuminata	Lao	Mas	Sun	Mas
Peristrophe acuminata	Acanthaceae	Lamiales	Angiosperm	Peristrophe	acuminata	Sin	MAs	Sun	MAs
Peristrophe bicalyculata	Acanthaceae	Lamiales	Angiosperm	Peristrophe	bicalyculata	Myn	MAs	Sun	MAs
Peristrophe bivalvis	Acanthaceae	Lamiales	Angiosperm	Peristrophe	bivalvis	Mly	MAs	Sun	MAs
Peristrophe bivalvis	Acanthaceae	Lamiales	Angiosperm	Peristrophe	bivalvis	Myn	MAs	Sun	MAs
Peristrophe bivalvis	Acanthaceae	Lamiales	Angiosperm	Peristrophe	bivalvis	Sin	MAs	Sun	MAs
Peristrophe bivalvis	Acanthaceae	Lamiales	Angiosperm	Peristrophe	bivalvis	Ind/Tim	LSI	Wal	LSI
Peristrophe bivalvis	Acanthaceae	Lamiales	Angiosperm	Peristrophe	bivalvis	Phi	Phi	Wal	Phi
Peristrophe brassii	Acanthaceae	Lamiales	Angiosperm	Peristrophe	brassii	Aus	Aus	Sah	AU Cape York Peninsula
Peristrophe caudatifolia	Acanthaceae	Lamiales	Angiosperm	Peristrophe	caudatifolia	Phi	Phi	Wal	Phi
Peristrophe cordatibractea	Acanthaceae	Lamiales	Angiosperm	Peristrophe	cordatibractea	Phi	Phi	Wal	Phi
Peristrophe dichotoma	Acanthaceae	Lamiales	Angiosperm	Peristrophe	dichotoma	Ind/PNG	NGu	Sah	NGu
Peristrophe dichotoma	Acanthaceae	Lamiales	Angiosperm	Peristrophe	dichotoma	Ind	Jav	Sun	Jav
Peristrophe dichotoma	Acanthaceae	Lamiales	Angiosperm	Peristrophe	dichotoma	Ind	Sul	Wal	Sul
Peristrophe dichotoma	Acanthaceae	Lamiales	Angiosperm	Peristrophe	dichotoma	Phi	Phi	Wal	Phi
Peristrophe fera	Acanthaceae	Lamiales	Angiosperm	Peristrophe	fera	Ind/PNG	NGu	Sah	NGu
Peristrophe fera	Acanthaceae	Lamiales	Angiosperm	Peristrophe	fera	Myn	MAs	Sun	MAs
Peristrophe hyssopifolia	Acanthaceae	Lamiales	Angiosperm	Peristrophe	hyssopifolia	Sin	MAs	Sun	MAs
Peristrophe lanceolaria	Acanthaceae	Lamiales	Angiosperm	Peristrophe	lanceolaria	Lao	MAs	Sun	MAs
Peristrophe lancifolia	Acanthaceae	Lamiales	Angiosperm	Peristrophe	lancifolia	Phi	Phi	Wal	Phi
Phaulopsis dorsiflora	Acanthaceae	Lamiales	Angiosperm	Phaulopsis	dorsiflora	Lao	MAs	Sun	MAs
Phaulopsis imbricata	Acanthaceae	Lamiales	Angiosperm	Phaulopsis	imbricata	Myn	MAs	Sun	MAs
Phlogacanthus curviflorus	Acanthaceae	Lamiales	Angiosperm	Phlogacanthus	curviflorus	Lao	MAs	Sun	MAs
Phlogacanthus curviflorus	Acanthaceae	Lamiales	Angiosperm	Phlogacanthus	curviflorus	Myn	MAs	Sun	MAs
Phlogacanthus cymosus	Acanthaceae	Lamiales	Angiosperm	Phlogacanthus	cymosus	Myn	MAs	Sun	MAs
Phlogacanthus insignis	Acanthaceae	Lamiales	Angiosperm	Phlogacanthus	insignis	Myn	MAs	Sun	MAs
Phlogacanthus novoguineensis	Acanthaceae	Lamiales	Angiosperm	Phlogacanthus	novoguineensis	Ind/PNG	NGu	Sah	NGu
Phlogacanthus pubinervius	Acanthaceae	Lamiales	Angiosperm	Phlogacanthus	pubinervius	Lao	MAs	Sun	MAs
Phlogacanthus pubinervius	Acanthaceae	Lamiales	Angiosperm	Phlogacanthus	pubinervius	Myn	MAs	Sun	MAs
Phlogacanthus pulcherrimus	Acanthaceae	Lamiales	Angiosperm	Phlogacanthus	pulcherrimus	Myn	MAs	Sun	MAs
Pseuderanthemum acuminatissimum	Acanthaceae	Lamiales	Angiosperm	Pseuderanthemum	acuminatissimum	Lao	MAs	Sun	MAs
Pseuderanthemum andersonii	Acanthaceae	Lamiales	Angiosperm	Pseuderanthemum	andersonii	Sin	MAs	Sun	MAs
Pseuderanthemum carruthersii	Acanthaceae	Lamiales	Angiosperm	Pseuderanthemum	carruthersii	Ind/PNG	NGu	Sah	NGu
Pseuderanthemum carruthersii	Acanthaceae	Lamiales	Angiosperm	Pseuderanthemum	carruthersii	Sin	MAs	Sun	MAs
Pseuderanthemum carruthersii	Acanthaceae	Lamiales	Angiosperm	Pseuderanthemum	carruthersii	Tha	MAs	Sun	MAs
Pseuderanthemum carruthersii	Acanthaceae	Lamiales	Angiosperm	Pseuderanthemum	carruthersii	Phi	Phi	Wal	Phi
Pseuderanthemum cinnabarinum	Acanthaceae	Lamiales	Angiosperm	Pseuderanthemum	cinnabarinum	Myn	MAs	Sun	MAs
Pseuderanthemum confusum	Acanthaceae	Lamiales	Angiosperm	Pseuderanthemum	confusum	Phi	Phi	Wal	Phi
Pseuderanthemum coudercii	Acanthaceae	Lamiales	Angiosperm	Pseuderanthemum	coudercii	Cam	MAs	Sun	MAs
Pseuderanthemum coudercii	Acanthaceae	Lamiales	Angiosperm	Pseuderanthemum	coudercii	Lao	MAs	Sun	MAs
Pseuderanthemum coudercii	Acanthaceae	Lamiales	Angiosperm	Pseuderanthemum	coudercii	Vie	MAs	Sun	MAs
Pseuderanthemum crenulatum	Acanthaceae	Lamiales	Angiosperm	Pseuderanthemum	crenulatum	Cam	MAs	Sun	MAs
Pseuderanthemum crenulatum	Acanthaceae	Lamiales	Angiosperm	Pseuderanthemum	crenulatum	Ind/Mly/Bru	Bor	Sun	Bor
Pseuderanthemum crenulatum	Acanthaceae	Lamiales	Angiosperm	Pseuderanthemum	crenulatum	Lao	MAs	Sun	MAs
Pseuderanthemum crenulatum	Acanthaceae	Lamiales	Angiosperm	Pseuderanthemum	crenulatum	Mly	MAs	Sun	MAs
Pseuderanthemum crenulatum	Acanthaceae	Lamiales	Angiosperm	Pseuderanthemum	crenulatum	Sin	MAs	Sun	MAs
Pseuderanthemum crenulatum	Acanthaceae	Lamiales	Angiosperm	Pseuderanthemum	crenulatum	Tha	MAs	Sun	MAs
Pseuderanthemum crenulatum	Acanthaceae	Lamiales	Angiosperm	Pseuderanthemum	crenulatum	Vie	MAs	Sun	MAs
Pseuderanthemum curtatum	Acanthaceae	Lamiales	Angiosperm	Pseuderanthemum	curtatum	Phi	Phi	Wal	Phi
Pseuderanthemum depauperatum	Acanthaceae	Lamiales	Angiosperm	Pseuderanthemum	depauperatum	Phi	Phi	Wal	Phi
Pseuderanthemum diversifolium	Acanthaceae	Lamiales	Angiosperm	Pseuderanthemum	diversifolium	Phi	Phi	Wal	Phi
Pseuderanthemum eberhardtii	Acanthaceae	Lamiales	Angiosperm	Pseuderanthemum	eberhardtii	Lao	Mas	Sun	Mas
Pseuderanthemum fruticosum	Acanthaceae	Lamiales	Angiosperm	Pseuderanthemum	fruticosum	Phi	Phi	Wal	Phi
Pseuderanthemum kewense	Acanthaceae	Lamiales	Angiosperm	Pseuderanthemum	kewense	Sin	MAs	Sun	MAs
Pseuderanthemum kingii	Acanthaceae	Lamiales	Angiosperm	Pseuderanthemum	kingii	Sin	MAs	Sun	MAs
Pseuderanthemum latifolium	Acanthaceae	Lamiales	Angiosperm	Pseuderanthemum	latifolium	Lao	MAs	Sun	MAs
Pseuderanthemum latifolium	Acanthaceae	Lamiales	Angiosperm	Pseuderanthemum	latifolium	Mly	MAs	Sun	MAs
Pseuderanthemum latifolium	Acanthaceae	Lamiales	Angiosperm	Pseuderanthemum	latifolium	Myn	MAs	Sun	MAs
Pseuderanthemum laxiflorum	Acanthaceae	Lamiales	Angiosperm	Pseuderanthemum	laxiflorum	Sin	MAs	Sun	MAs
Pseuderanthemum minutiflorum	Acanthaceae	Lamiales	Angiosperm	Pseuderanthemum	minutiflorum	Phi	Phi	Wal	Phi
Pseuderanthemum polyanthum	Acanthaceae	Lamiales	Angiosperm	Pseuderanthemum	polyanthum	Myn	MAs	Sun	MAs
Pseuderanthemum repandum	Acanthaceae	Lamiales	Angiosperm	Pseuderanthemum	repandum	Phi	Phi	Wal	Phi
Pseuderanthemum tenellum	Acanthaceae	Lamiales	Angiosperm	Pseuderanthemum	tenellum	Aus	Aus	Sah	AU Eastern Queensland
Pseuderanthemum variabile	Acanthaceae	Lamiales	Angiosperm	Pseuderanthemum	variabile	Aus	Aus	Sah	AU Adelaide
Pseuderanthemum variabile	Acanthaceae	Lamiales	Angiosperm	Pseuderanthemum	variabile	Aus	Aus	Sah	AU Arnhem Land
Pseuderanthemum variabile	Acanthaceae	Lamiales	Angiosperm	Pseuderanthemum	variabile	Aus	Aus	Sah	AU Atherton Plateau
Pseuderanthemum variabile	Acanthaceae	Lamiales	Angiosperm	Pseuderanthemum	variabile	Aus	Aus	Sah	AU Cape York Peninsula
Pseuderanthemum variabile	Acanthaceae	Lamiales	Angiosperm	Pseuderanthemum	variabile	Aus	Aus	Sah	AU Central Queensland
Pseuderanthemum variabile	Acanthaceae	Lamiales	Angiosperm	Pseuderanthemum	variabile	Aus	Aus	Sah	AU Eastern Desert
Pseuderanthemum variabile	Acanthaceae	Lamiales	Angiosperm	Pseuderanthemum	variabile	Aus	Aus	Sah	AU Eastern Queensland
Pseuderanthemum variabile	Acanthaceae	Lamiales	Angiosperm	Pseuderanthemum	variabile	Aus	Aus	Sah	AU Southeastern
Pseuderanthemum variabile	Acanthaceae	Lamiales	Angiosperm	Pseuderanthemum	variabile	Aus	Aus	Sah	AU Victoria
Pseuderanthemum variabile	Acanthaceae	Lamiales	Angiosperm	Pseuderanthemum	variabile	Ind/PNG	NGu	Sah	NGu
Pseuderanthemum variabile	Acanthaceae	Lamiales	Angiosperm	Pseuderanthemum	variabile	Ind	Jav	Sun	Jav
Pseuderanthemum variabile	Acanthaceae	Lamiales	Angiosperm	Pseuderanthemum	variabile	Ind	Mlk	Wal	Mlk
Ptyssiglottis creaghii	Acanthaceae	Lamiales	Angiosperm	Ptyssiglottis	creaghii	Ind/Mly/Bru	Bor	Sun	Bor
Ptyssiglottis cyrtandroides	Acanthaceae	Lamiales	Angiosperm	Ptyssiglottis	cyrtandroides	Ind/PNG	NGu	Sah	NGu
Ptyssiglottis dispar	Acanthaceae	Lamiales	Angiosperm	Ptyssiglottis	dispar	Phi	Phi	Wal	Phi
Ptyssiglottis frutescens	Acanthaceae	Lamiales	Angiosperm	Ptyssiglottis	frutescens	Ind/Mly/Bru	Bor	Sun	Bor
Ptyssiglottis kunthiana	Acanthaceae	Lamiales	Angiosperm	Ptyssiglottis	kunthiana	Ind	Sum	Sun	Sum
Ptyssiglottis kunthiana	Acanthaceae	Lamiales	Angiosperm	Ptyssiglottis	kunthiana	Mly	MAs	Sun	MAs
Ptyssiglottis salicifolia	Acanthaceae	Lamiales	Angiosperm	Ptyssiglottis	salicifolia	Ind/Mly/Bru	Bor	Sun	Bor
Ptyssiglottis undulata	Acanthaceae	Lamiales	Angiosperm	Ptyssiglottis	undulata	Phi	Phi	Wal	Phi
Pyrrothrix rufocapitata	Acanthaceae	Lamiales	Angiosperm	Pyrrothrix	rufocapitata	Mly	MAs	Sun	MAs
Pyrrothrix rufostrobilata	Acanthaceae	Lamiales	Angiosperm	Pyrrothrix	rufostrobilata	Mly	MAs	Sun	MAs
Rhaphidospora bonneyana	Acanthaceae	Lamiales	Angiosperm	Rhaphidospora	bonneyana	Aus	Aus	Sah	AU Central Queensland
Rhaphidospora bonneyana	Acanthaceae	Lamiales	Angiosperm	Rhaphidospora	bonneyana	Aus	Aus	Sah	AU Eastern Desert
Rhaphidospora cavernarum	Acanthaceae	Lamiales	Angiosperm	Rhaphidospora	cavernarum	Aus	Aus	Sah	AU Atherton Plateau
Rhaphidospora cavernarum	Acanthaceae	Lamiales	Angiosperm	Rhaphidospora	cavernarum	Aus	Aus	Sah	AU Cape York Peninsula
Rhinacanthus nasutus	Acanthaceae	Lamiales	Angiosperm	Rhinacanthus	nasutus	Lao	MAs	Sun	MAs
Rhinacanthus nasutus	Acanthaceae	Lamiales	Angiosperm	Rhinacanthus	nasutus	Mly	MAs	Sun	MAs
Rhinacanthus nasutus	Acanthaceae	Lamiales	Angiosperm	Rhinacanthus	nasutus	Myn	MAs	Sun	MAs
Rhinacanthus nasutus	Acanthaceae	Lamiales	Angiosperm	Rhinacanthus	nasutus	Tha	MAs	Sun	MAs
Rhinacanthus nasutus	Acanthaceae	Lamiales	Angiosperm	Rhinacanthus	nasutus	Ind	Mlk	Wal	Mlk
Rhinacanthus nasutus	Acanthaceae	Lamiales	Angiosperm	Rhinacanthus	nasutus	Ind	Sul	Wal	Sul
Rhinacanthus nasutus	Acanthaceae	Lamiales	Angiosperm	Rhinacanthus	nasutus	Phi	Phi	Wal	Phi
Rostellularia adscendens	Acanthaceae	Lamiales	Angiosperm	Rostellularia	adscendens	Aus	Aus	Sah	AU Adelaide
Rostellularia adscendens	Acanthaceae	Lamiales	Angiosperm	Rostellularia	adscendens	Aus	Aus	Sah	AU Arnhem Land
Rostellularia adscendens	Acanthaceae	Lamiales	Angiosperm	Rostellularia	adscendens	Aus	Aus	Sah	AU Atherton Plateau
Rostellularia adscendens	Acanthaceae	Lamiales	Angiosperm	Rostellularia	adscendens	Aus	Aus	Sah	AU Cape York Peninsula
Rostellularia adscendens	Acanthaceae	Lamiales	Angiosperm	Rostellularia	adscendens	Aus	Aus	Sah	AU Central Desert
Rostellularia adscendens	Acanthaceae	Lamiales	Angiosperm	Rostellularia	adscendens	Aus	Aus	Sah	AU Central Queensland
Rostellularia adscendens	Acanthaceae	Lamiales	Angiosperm	Rostellularia	adscendens	Aus	Aus	Sah	AU Eastern Desert
Rostellularia adscendens	Acanthaceae	Lamiales	Angiosperm	Rostellularia	adscendens	Aus	Aus	Sah	AU Eastern Queensland
Rostellularia adscendens	Acanthaceae	Lamiales	Angiosperm	Rostellularia	adscendens	Aus	Aus	Sah	AU Eyre Peninsula
Rostellularia adscendens	Acanthaceae	Lamiales	Angiosperm	Rostellularia	adscendens	Aus	Aus	Sah	AU Great Sandy Desert Interzone
Rostellularia adscendens	Acanthaceae	Lamiales	Angiosperm	Rostellularia	adscendens	Aus	Aus	Sah	AU Kimberley Plateau
Rostellularia adscendens	Acanthaceae	Lamiales	Angiosperm	Rostellularia	adscendens	Aus	Aus	Sah	AU Southeastern
Rostellularia adscendens	Acanthaceae	Lamiales	Angiosperm	Rostellularia	adscendens	Aus	Aus	Sah	AU Western Desert
Rostellularia obtusa	Acanthaceae	Lamiales	Angiosperm	Rostellularia	obtusa	Aus	Aus	Sah	AU Eastern Queensland
Rostellularia obtusa	Acanthaceae	Lamiales	Angiosperm	Rostellularia	obtusa	Ind	Sul	Wal	Sul
Rostellularia smeruensis	Acanthaceae	Lamiales	Angiosperm	Rostellularia	smeruensis	Ind/Tim	LSI	Wal	LSI
Ruellia affinis	Acanthaceae	Lamiales	Angiosperm	Ruellia	affinis	Sin	MAs	Sun	MAs
Ruellia amoena	Acanthaceae	Lamiales	Angiosperm	Ruellia	amoena	Mly	MAs	Sun	MAs
Ruellia amoena	Acanthaceae	Lamiales	Angiosperm	Ruellia	amoena	Sin	MAs	Sun	MAs
Ruellia aruensis	Acanthaceae	Lamiales	Angiosperm	Ruellia	aruensis	Ind/PNG	NGu	Sah	NGu
Ruellia aruensis	Acanthaceae	Lamiales	Angiosperm	Ruellia	aruensis	Ind	Mlk	Wal	Mlk
Ruellia bicolor	Acanthaceae	Lamiales	Angiosperm	Ruellia	bicolor	Ind	Mlk	Wal	Mlk
Ruellia bicolor	Acanthaceae	Lamiales	Angiosperm	Ruellia	bicolor	Ind	Sul	Wal	Sul
Ruellia chartacea	Acanthaceae	Lamiales	Angiosperm	Ruellia	chartacea	Sin	MAs	Sun	MAs
Ruellia ciliata	Acanthaceae	Lamiales	Angiosperm	Ruellia	ciliata	Myn	MAs	Sun	MAs
Ruellia ciliosa	Acanthaceae	Lamiales	Angiosperm	Ruellia	ciliosa	Sin	MAs	Sun	MAs
Ruellia contorta	Acanthaceae	Lamiales	Angiosperm	Ruellia	contorta	Phi	Phi	Wal	Phi
Ruellia diffusa	Acanthaceae	Lamiales	Angiosperm	Ruellia	diffusa	Myn	MAs	Sun	MAs
Ruellia flagelliformis	Acanthaceae	Lamiales	Angiosperm	Ruellia	flagelliformis	Ind	Mlk	Wal	Mlk
Ruellia forbesii	Acanthaceae	Lamiales	Angiosperm	Ruellia	forbesii	Ind/PNG	NGu	Sah	NGu
Ruellia gloeocalyx	Acanthaceae	Lamiales	Angiosperm	Ruellia	gloeocalyx	Ind/PNG	NGu	Sah	NGu
Ruellia luzoniensis	Acanthaceae	Lamiales	Angiosperm	Ruellia	luzoniensis	Phi	Phi	Wal	Phi
Ruellia macrantha	Acanthaceae	Lamiales	Angiosperm	Ruellia	macrantha	Sin	MAs	Sun	MAs
Ruellia napifera	Acanthaceae	Lamiales	Angiosperm	Ruellia	napifera	Ind	Sul	Wal	Sul
Ruellia napifera	Acanthaceae	Lamiales	Angiosperm	Ruellia	napifera	Ind/Tim	LSI	Wal	LSI
Ruellia napifera	Acanthaceae	Lamiales	Angiosperm	Ruellia	napifera	Phi	Phi	Wal	Phi
Ruellia nudiflora	Acanthaceae	Lamiales	Angiosperm	Ruellia	nudiflora	Lao	MAs	Sun	MAs
Ruellia philippinensis	Acanthaceae	Lamiales	Angiosperm	Ruellia	philippinensis	Phi	Phi	Wal	Phi
Ruellia prostrata	Acanthaceae	Lamiales	Angiosperm	Ruellia	prostrata	Mly	MAs	Sun	MAs
Ruellia repens	Acanthaceae	Lamiales	Angiosperm	Ruellia	repens	Ind/PNG	NGu	Sah	NGu
Ruellia repens	Acanthaceae	Lamiales	Angiosperm	Ruellia	repens	Mly	MAs	Sun	MAs
Ruellia repens	Acanthaceae	Lamiales	Angiosperm	Ruellia	repens	Sin	MAs	Sun	MAs
Ruellia repens	Acanthaceae	Lamiales	Angiosperm	Ruellia	repens	Phi	Phi	Wal	Phi
Ruellia rosea	Acanthaceae	Lamiales	Angiosperm	Ruellia	rosea	Sin	MAs	Sun	MAs
Ruellia serpens	Acanthaceae	Lamiales	Angiosperm	Ruellia	serpens	Myn	MAs	Sun	MAs
Ruellia simplex	Acanthaceae	Lamiales	Angiosperm	Ruellia	simplex	Ind/PNG	NGu	Sah	NGu
Ruellia simplex	Acanthaceae	Lamiales	Angiosperm	Ruellia	simplex	Sin	MAs	Sun	MAs
Ruellia sumatrensis	Acanthaceae	Lamiales	Angiosperm	Ruellia	sumatrensis	Mly	MAs	Sun	MAs
Ruellia sumatrensis	Acanthaceae	Lamiales	Angiosperm	Ruellia	sumatrensis	Tha	MAs	Sun	MAs
Ruellia tuberosa	Acanthaceae	Lamiales	Angiosperm	Ruellia	tuberosa	Ind/PNG	NGu	Sah	NGu
Ruellia tuberosa	Acanthaceae	Lamiales	Angiosperm	Ruellia	tuberosa	Cam	MAs	Sun	MAs
Ruellia tuberosa	Acanthaceae	Lamiales	Angiosperm	Ruellia	tuberosa	Lao	MAs	Sun	MAs
Ruellia tuberosa	Acanthaceae	Lamiales	Angiosperm	Ruellia	tuberosa	Mly	MAs	Sun	MAs
Ruellia tuberosa	Acanthaceae	Lamiales	Angiosperm	Ruellia	tuberosa	Myn	MAs	Sun	MAs
Ruellia tuberosa	Acanthaceae	Lamiales	Angiosperm	Ruellia	tuberosa	Sin	MAs	Sun	MAs
Ruellia tuberosa	Acanthaceae	Lamiales	Angiosperm	Ruellia	tuberosa	Vie	MAs	Sun	MAs
Ruellia tuberosa	Acanthaceae	Lamiales	Angiosperm	Ruellia	tuberosa	Ind	Sul	Wal	Sul
Ruellia tuberosa	Acanthaceae	Lamiales	Angiosperm	Ruellia	tuberosa	Ind/Tim	LSI	Wal	LSI
Ruellia tuberosa	Acanthaceae	Lamiales	Angiosperm	Ruellia	tuberosa	Phi	Phi	Wal	Phi
Ruellia tweediana	Acanthaceae	Lamiales	Angiosperm	Ruellia	tweediana	Sin	MAs	Sun	MAs
Ruellia vincta	Acanthaceae	Lamiales	Angiosperm	Ruellia	vincta	Lao	Mas	Sun	Mas
Rungia diversiformis	Acanthaceae	Lamiales	Angiosperm	Rungia	diversiformis	Phi	Phi	Wal	Phi
Rungia lepida	Acanthaceae	Lamiales	Angiosperm	Rungia	lepida	Phi	Phi	Wal	Phi
Rungia membranacea	Acanthaceae	Lamiales	Angiosperm	Rungia	membranacea	Phi	Phi	Wal	Phi
Rungia pectinata	Acanthaceae	Lamiales	Angiosperm	Rungia	pectinata	Ind/PNG	NGu	Sah	NGu
Rungia pectinata	Acanthaceae	Lamiales	Angiosperm	Rungia	pectinata	Cam	MAs	Sun	MAs
Rungia pectinata	Acanthaceae	Lamiales	Angiosperm	Rungia	pectinata	Lao	MAs	Sun	MAs
Rungia pectinata	Acanthaceae	Lamiales	Angiosperm	Rungia	pectinata	Mly	MAs	Sun	MAs
Rungia pectinata	Acanthaceae	Lamiales	Angiosperm	Rungia	pectinata	Myn	MAs	Sun	MAs
Rungia pectinata	Acanthaceae	Lamiales	Angiosperm	Rungia	pectinata	Vie	MAs	Sun	MAs
Rungia pectinata	Acanthaceae	Lamiales	Angiosperm	Rungia	pectinata	Phi	Phi	Wal	Phi
Rungia philippinensis	Acanthaceae	Lamiales	Angiosperm	Rungia	philippinensis	Phi	Phi	Wal	Phi
Rungia podostachya	Acanthaceae	Lamiales	Angiosperm	Rungia	podostachya	Phi	Phi	Wal	Phi
Rungia purpurascens	Acanthaceae	Lamiales	Angiosperm	Rungia	purpurascens	Tha	MAs	Sun	MAs
Ruspolia hypocrateriformis	Acanthaceae	Lamiales	Angiosperm	Ruspolia	hypocrateriformis	Sin	MAs	Sun	MAs
Ruspolia seticalyx	Acanthaceae	Lamiales	Angiosperm	Ruspolia	seticalyx	Sin	MAs	Sun	MAs
Ruttya fruticosa	Acanthaceae	Lamiales	Angiosperm	Ruttya	fruticosa	Sin	MAs	Sun	MAs
Sanchezia nobilis	Acanthaceae	Lamiales	Angiosperm	Sanchezia	nobilis	Phi	Phi	Wal	Phi
Sanchezia parvibracteata	Acanthaceae	Lamiales	Angiosperm	Sanchezia	parvibracteata	Ind/PNG	NGu	Sah	NGu
Sanchezia speciosa	Acanthaceae	Lamiales	Angiosperm	Sanchezia	speciosa	Sin	MAs	Sun	MAs
Sautiera tinctorum	Acanthaceae	Lamiales	Angiosperm	Sautiera	tinctorum	Ind	LSI	Wal	LSI
Schaueria flavicoma	Acanthaceae	Lamiales	Angiosperm	Schaueria	flavicoma	Sin	MAs	Sun	MAs
Semnostachya leytensis	Acanthaceae	Lamiales	Angiosperm	Semnostachya	leytensis	Phi	Phi	Wal	Phi
Semnothyrsus sumatranus	Acanthaceae	Lamiales	Angiosperm	Semnothyrsus	sumatranus	Ind	Sum	Sun	Sum
Sericocalyx crispus	Acanthaceae	Lamiales	Angiosperm	Sericocalyx	crispus	Ind	Jav	Sun	Jav
Sericocalyx crispus	Acanthaceae	Lamiales	Angiosperm	Sericocalyx	crispus	Ind/Tim	LSI	Wal	LSI
Staurogyne argentea	Acanthaceae	Lamiales	Angiosperm	Staurogyne	argentea	Myn	MAs	Sun	MAs
Staurogyne athroantha	Acanthaceae	Lamiales	Angiosperm	Staurogyne	athroantha	Phi	Phi	Wal	Phi
Staurogyne brachystachya	Acanthaceae	Lamiales	Angiosperm	Staurogyne	brachystachya	Lao	MAs	Sun	MAs
Staurogyne cambodiana	Acanthaceae	Lamiales	Angiosperm	Staurogyne	cambodiana	Lao	Mas	Sun	Mas
Staurogyne capillipes	Acanthaceae	Lamiales	Angiosperm	Staurogyne	capillipes	Phi	Phi	Wal	Phi
Staurogyne concinnula	Acanthaceae	Lamiales	Angiosperm	Staurogyne	concinnula	Tha	MAs	Sun	MAs
Staurogyne debilis	Acanthaceae	Lamiales	Angiosperm	Staurogyne	debilis	Ind	Sul	Wal	Sul
Staurogyne debilis	Acanthaceae	Lamiales	Angiosperm	Staurogyne	debilis	Phi	Phi	Wal	Phi
Staurogyne griffithiana	Acanthaceae	Lamiales	Angiosperm	Staurogyne	griffithiana	Sin	MAs	Sun	MAs
Staurogyne kingiana	Acanthaceae	Lamiales	Angiosperm	Staurogyne	kingiana	Sin	MAs	Sun	MAs
Staurogyne lanceolata	Acanthaceae	Lamiales	Angiosperm	Staurogyne	lanceolata	Lao	Mas	Sun	Mas
Staurogyne lasiobotrys	Acanthaceae	Lamiales	Angiosperm	Staurogyne	lasiobotrys	Myn	MAs	Sun	MAs
Staurogyne leptocaulis	Acanthaceae	Lamiales	Angiosperm	Staurogyne	leptocaulis	Aus	Aus	Sah	AU Arnhem Land
Staurogyne leptocaulis	Acanthaceae	Lamiales	Angiosperm	Staurogyne	leptocaulis	Aus	Aus	Sah	AU Cape York Peninsula
Staurogyne leptocaulis	Acanthaceae	Lamiales	Angiosperm	Staurogyne	leptocaulis	Aus	Aus	Sah	AU Central Desert
Staurogyne leptocaulis	Acanthaceae	Lamiales	Angiosperm	Staurogyne	leptocaulis	Aus	Aus	Sah	AU External Territories
Staurogyne leptocaulis	Acanthaceae	Lamiales	Angiosperm	Staurogyne	leptocaulis	Aus	Aus	Sah	AU Kimberley Plateau
Staurogyne merrillii	Acanthaceae	Lamiales	Angiosperm	Staurogyne	merrillii	Phi	Phi	Wal	Phi
Staurogyne neesii	Acanthaceae	Lamiales	Angiosperm	Staurogyne	neesii	Phi	Phi	Wal	Phi
Staurogyne ophiorrhizoides	Acanthaceae	Lamiales	Angiosperm	Staurogyne	ophiorrhizoides	Phi	Phi	Wal	Phi
Staurogyne palawanensis	Acanthaceae	Lamiales	Angiosperm	Staurogyne	palawanensis	Phi	Phi	Wal	Phi
Staurogyne panayensis	Acanthaceae	Lamiales	Angiosperm	Staurogyne	panayensis	Phi	Phi	Wal	Phi
Staurogyne polybotrya	Acanthaceae	Lamiales	Angiosperm	Staurogyne	polybotrya	Myn	MAs	Sun	MAs
Staurogyne racemosa	Acanthaceae	Lamiales	Angiosperm	Staurogyne	racemosa	Lao	MAs	Sun	MAs
Staurogyne rivularis	Acanthaceae	Lamiales	Angiosperm	Staurogyne	rivularis	Phi	Phi	Wal	Phi
Staurogyne samarensis	Acanthaceae	Lamiales	Angiosperm	Staurogyne	samarensis	Phi	Phi	Wal	Phi
Staurogyne sesamoides	Acanthaceae	Lamiales	Angiosperm	Staurogyne	sesamoides	Lao	MAs	Sun	MAs
Staurogyne setigera	Acanthaceae	Lamiales	Angiosperm	Staurogyne	setigera	Sin	MAs	Sun	MAs
Staurogyne setigera	Acanthaceae	Lamiales	Angiosperm	Staurogyne	setigera	Phi	Phi	Wal	Phi
Staurogyne spraguei	Acanthaceae	Lamiales	Angiosperm	Staurogyne	spraguei	Ind/PNG	NGu	Sah	NGu
Staurogyne subcapitata	Acanthaceae	Lamiales	Angiosperm	Staurogyne	subcapitata	Phi	Phi	Wal	Phi
Staurogyne subcordata	Acanthaceae	Lamiales	Angiosperm	Staurogyne	subcordata	Phi	Phi	Wal	Phi
Strobilanthes affinis	Acanthaceae	Lamiales	Angiosperm	Strobilanthes	affinis	Myn	MAs	Sun	MAs
Strobilanthes anamiticus	Acanthaceae	Lamiales	Angiosperm	Strobilanthes	anamiticus	Lao	MAs	Sun	MAs
Strobilanthes angustifrons	Acanthaceae	Lamiales	Angiosperm	Strobilanthes	angustifrons	Myn	MAs	Sun	MAs
Strobilanthes antonii	Acanthaceae	Lamiales	Angiosperm	Strobilanthes	antonii	Phi	Phi	Wal	Phi
Strobilanthes apoensis	Acanthaceae	Lamiales	Angiosperm	Strobilanthes	apoensis	Phi	Phi	Wal	Phi
Strobilanthes aprica	Acanthaceae	Lamiales	Angiosperm	Strobilanthes	aprica	Myn	MAs	Sun	MAs
Strobilanthes atropurpureus	Acanthaceae	Lamiales	Angiosperm	Strobilanthes	atropurpureus	Myn	MAs	Sun	MAs
Strobilanthes auriculatus	Acanthaceae	Lamiales	Angiosperm	Strobilanthes	auriculatus	Lao	MAs	Sun	MAs
Strobilanthes auriculatus	Acanthaceae	Lamiales	Angiosperm	Strobilanthes	auriculatus	Myn	MAs	Sun	MAs
Strobilanthes bipartita	Acanthaceae	Lamiales	Angiosperm	Strobilanthes	bipartita	Lao	MAs	Sun	MAs
Strobilanthes brandisii	Acanthaceae	Lamiales	Angiosperm	Strobilanthes	brandisii	Lao	Mas	Sun	Mas
Strobilanthes bremekampiana	Acanthaceae	Lamiales	Angiosperm	Strobilanthes	bremekampiana	Ind/Tim	LSI	Wal	LSI
Strobilanthes bremekampiana	Acanthaceae	Lamiales	Angiosperm	Strobilanthes	bremekampiana	Ind	LSI	Wal	LSI
Strobilanthes capitata	Acanthaceae	Lamiales	Angiosperm	Strobilanthes	capitata	Myn	MAs	Sun	MAs
Strobilanthes chinensis	Acanthaceae	Lamiales	Angiosperm	Strobilanthes	chinensis	Lao	MAs	Sun	MAs
Strobilanthes chrysodelta	Acanthaceae	Lamiales	Angiosperm	Strobilanthes	chrysodelta	Myn	MAs	Sun	MAs
Strobilanthes cincinnalis	Acanthaceae	Lamiales	Angiosperm	Strobilanthes	cincinnalis	Phi	Phi	Wal	Phi
Strobilanthes congesta	Acanthaceae	Lamiales	Angiosperm	Strobilanthes	congesta	Myn	MAs	Sun	MAs
Strobilanthes crispa	Acanthaceae	Lamiales	Angiosperm	Strobilanthes	crispa	Sin	MAs	Sun	MAs
Strobilanthes cusia	Acanthaceae	Lamiales	Angiosperm	Strobilanthes	cusia	Lao	MAs	Sun	MAs
Strobilanthes cusia	Acanthaceae	Lamiales	Angiosperm	Strobilanthes	cusia	Myn	MAs	Sun	MAs
Strobilanthes cusia	Acanthaceae	Lamiales	Angiosperm	Strobilanthes	cusia	Sin	MAs	Sun	MAs
Strobilanthes dalzielii	Acanthaceae	Lamiales	Angiosperm	Strobilanthes	dalzielii	Myn	MAs	Sun	MAs
Strobilanthes decumbens	Acanthaceae	Lamiales	Angiosperm	Strobilanthes	decumbens	Tha	MAs	Sun	MAs
Strobilanthes dimorphotricha	Acanthaceae	Lamiales	Angiosperm	Strobilanthes	dimorphotricha	Cam	MAs	Sun	MAs
Strobilanthes dimorphotricha	Acanthaceae	Lamiales	Angiosperm	Strobilanthes	dimorphotricha	Ind	Sum	Sun	Sum
Strobilanthes dimorphotricha	Acanthaceae	Lamiales	Angiosperm	Strobilanthes	dimorphotricha	Lao	MAs	Sun	MAs
Strobilanthes dimorphotricha	Acanthaceae	Lamiales	Angiosperm	Strobilanthes	dimorphotricha	Tha	MAs	Sun	MAs
Strobilanthes dimorphotricha	Acanthaceae	Lamiales	Angiosperm	Strobilanthes	dimorphotricha	Vie	MAs	Sun	MAs
Strobilanthes discolor	Acanthaceae	Lamiales	Angiosperm	Strobilanthes	discolor	Myn	MAs	Sun	MAs
Strobilanthes disparifolia	Acanthaceae	Lamiales	Angiosperm	Strobilanthes	disparifolia	Lao	MAs	Sun	MAs
Strobilanthes dyeriana	Acanthaceae	Lamiales	Angiosperm	Strobilanthes	dyeriana	Sin	MAs	Sun	MAs
Strobilanthes dyeriana	Acanthaceae	Lamiales	Angiosperm	Strobilanthes	dyeriana	Phi	Phi	Wal	Phi
Strobilanthes echinata	Acanthaceae	Lamiales	Angiosperm	Strobilanthes	echinata	Cam	MAs	Sun	MAs
Strobilanthes echinata	Acanthaceae	Lamiales	Angiosperm	Strobilanthes	echinata	Ind/Mly/Bru	Bor	Sun	Bor
Strobilanthes echinata	Acanthaceae	Lamiales	Angiosperm	Strobilanthes	echinata	Lao	MAs	Sun	MAs
Strobilanthes echinata	Acanthaceae	Lamiales	Angiosperm	Strobilanthes	echinata	Myn	MAs	Sun	MAs
Strobilanthes echinata	Acanthaceae	Lamiales	Angiosperm	Strobilanthes	echinata	Vie	MAs	Sun	MAs
Strobilanthes fimbriata	Acanthaceae	Lamiales	Angiosperm	Strobilanthes	fimbriata	Myn	MAs	Sun	MAs
Strobilanthes fluviatilis	Acanthaceae	Lamiales	Angiosperm	Strobilanthes	fluviatilis	Myn	MAs	Sun	MAs
Strobilanthes fusca	Acanthaceae	Lamiales	Angiosperm	Strobilanthes	fusca	Phi	Phi	Wal	Phi
Strobilanthes galeopsis	Acanthaceae	Lamiales	Angiosperm	Strobilanthes	galeopsis	Ind/Mly/Bru	Bor	Sun	Bor
Strobilanthes gigantodes	Acanthaceae	Lamiales	Angiosperm	Strobilanthes	gigantodes	Tha	MAs	Sun	MAs
Strobilanthes halconensis	Acanthaceae	Lamiales	Angiosperm	Strobilanthes	halconensis	Phi	Phi	Wal	Phi
Strobilanthes hamiltoniana	Acanthaceae	Lamiales	Angiosperm	Strobilanthes	hamiltoniana	Ind	Jav	Sun	Jav
Strobilanthes hamiltoniana	Acanthaceae	Lamiales	Angiosperm	Strobilanthes	hamiltoniana	Myn	MAs	Sun	MAs
Strobilanthes hossei	Acanthaceae	Lamiales	Angiosperm	Strobilanthes	hossei	Myn	MAs	Sun	MAs
Strobilanthes hypomalla	Acanthaceae	Lamiales	Angiosperm	Strobilanthes	hypomalla	Lao	Mas	Sun	Mas
Strobilanthes inflata	Acanthaceae	Lamiales	Angiosperm	Strobilanthes	inflata	Myn	MAs	Sun	MAs
Strobilanthes kunthianus	Acanthaceae	Lamiales	Angiosperm	Strobilanthes	kunthianus	Myn	MAs	Sun	MAs
Strobilanthes labordei	Acanthaceae	Lamiales	Angiosperm	Strobilanthes	labordei	Myn	MAs	Sun	MAs
Strobilanthes lanceifolia	Acanthaceae	Lamiales	Angiosperm	Strobilanthes	lanceifolia	Myn	MAs	Sun	MAs
Strobilanthes longispica	Acanthaceae	Lamiales	Angiosperm	Strobilanthes	longispica	Myn	MAs	Sun	MAs
Strobilanthes mearnsii	Acanthaceae	Lamiales	Angiosperm	Strobilanthes	mearnsii	Phi	Phi	Wal	Phi
Strobilanthes merrillii	Acanthaceae	Lamiales	Angiosperm	Strobilanthes	merrillii	Phi	Phi	Wal	Phi
Strobilanthes microcephala	Acanthaceae	Lamiales	Angiosperm	Strobilanthes	microcephala	Lao	Mas	Sun	Mas
Strobilanthes mogokensis	Acanthaceae	Lamiales	Angiosperm	Strobilanthes	mogokensis	Myn	MAs	Sun	MAs
Strobilanthes mogokensis	Acanthaceae	Lamiales	Angiosperm	Strobilanthes	mogokensis	Tha	MAs	Sun	MAs
Strobilanthes multidens	Acanthaceae	Lamiales	Angiosperm	Strobilanthes	multidens	Myn	MAs	Sun	MAs
Strobilanthes nobilis	Acanthaceae	Lamiales	Angiosperm	Strobilanthes	nobilis	Myn	MAs	Sun	MAs
Strobilanthes oresbius	Acanthaceae	Lamiales	Angiosperm	Strobilanthes	oresbius	Myn	MAs	Sun	MAs
Strobilanthes pachys	Acanthaceae	Lamiales	Angiosperm	Strobilanthes	pachys	Phi	Phi	Wal	Phi
Strobilanthes palawanensis	Acanthaceae	Lamiales	Angiosperm	Strobilanthes	palawanensis	Sin	MAs	Sun	MAs
Strobilanthes palawanensis	Acanthaceae	Lamiales	Angiosperm	Strobilanthes	palawanensis	Phi	Phi	Wal	Phi
Strobilanthes pateriformis	Acanthaceae	Lamiales	Angiosperm	Strobilanthes	pateriformis	Lao	MAs	Sun	MAs
Strobilanthes pateriformis	Acanthaceae	Lamiales	Angiosperm	Strobilanthes	pateriformis	Mly	MAs	Sun	MAs
Strobilanthes patulus	Acanthaceae	Lamiales	Angiosperm	Strobilanthes	patulus	Lao	Mas	Sun	Mas
Strobilanthes pectinatus	Acanthaceae	Lamiales	Angiosperm	Strobilanthes	pectinatus	Myn	MAs	Sun	MAs
Strobilanthes persicifolia	Acanthaceae	Lamiales	Angiosperm	Strobilanthes	persicifolia	Myn	MAs	Sun	MAs
Strobilanthes poilanei	Acanthaceae	Lamiales	Angiosperm	Strobilanthes	poilanei	Lao	Mas	Sun	Mas
Strobilanthes polystachya	Acanthaceae	Lamiales	Angiosperm	Strobilanthes	polystachya	Lao	Mas	Sun	Mas
Strobilanthes quadrifaria	Acanthaceae	Lamiales	Angiosperm	Strobilanthes	quadrifaria	Lao	MAs	Sun	MAs
Strobilanthes quadrifaria	Acanthaceae	Lamiales	Angiosperm	Strobilanthes	quadrifaria	Myn	MAs	Sun	MAs
Strobilanthes repanda	Acanthaceae	Lamiales	Angiosperm	Strobilanthes	repanda	Myn	MAs	Sun	MAs
Strobilanthes repanda	Acanthaceae	Lamiales	Angiosperm	Strobilanthes	repanda	Lao	Mas	Sun	Mas
Strobilanthes rubescens	Acanthaceae	Lamiales	Angiosperm	Strobilanthes	rubescens	Myn	MAs	Sun	MAs
Strobilanthes rufescens	Acanthaceae	Lamiales	Angiosperm	Strobilanthes	rufescens	Myn	MAs	Sun	MAs
Strobilanthes scaber	Acanthaceae	Lamiales	Angiosperm	Strobilanthes	scaber	Myn	MAs	Sun	MAs
Strobilanthes schomburgkii	Acanthaceae	Lamiales	Angiosperm	Strobilanthes	schomburgkii	Cam	MAs	Sun	MAs
Strobilanthes schomburgkii	Acanthaceae	Lamiales	Angiosperm	Strobilanthes	schomburgkii	Vie	MAs	Sun	MAs
Strobilanthes serrata	Acanthaceae	Lamiales	Angiosperm	Strobilanthes	serrata	Myn	MAs	Sun	MAs
Strobilanthes setosa	Acanthaceae	Lamiales	Angiosperm	Strobilanthes	setosa	Myn	MAs	Sun	MAs
Strobilanthes speciosa	Acanthaceae	Lamiales	Angiosperm	Strobilanthes	speciosa	Ind	Jav	Sun	Jav
Strobilanthes speciosa	Acanthaceae	Lamiales	Angiosperm	Strobilanthes	speciosa	Ind/Mly/Bru	Bor	Sun	Bor
Strobilanthes speciosa	Acanthaceae	Lamiales	Angiosperm	Strobilanthes	speciosa	Myn	MAs	Sun	MAs
Strobilanthes tanakae	Acanthaceae	Lamiales	Angiosperm	Strobilanthes	tanakae	Myn	MAs	Sun	MAs
Strobilanthes tenuiflora	Acanthaceae	Lamiales	Angiosperm	Strobilanthes	tenuiflora	Tha	MAs	Sun	MAs
Strobilanthes thomsonii	Acanthaceae	Lamiales	Angiosperm	Strobilanthes	thomsonii	Myn	MAs	Sun	MAs
Strobilanthes timorensis	Acanthaceae	Lamiales	Angiosperm	Strobilanthes	timorensis	Ind/Tim	LSI	Wal	LSI
Strobilanthes tomentosa	Acanthaceae	Lamiales	Angiosperm	Strobilanthes	tomentosa	Myn	MAs	Sun	MAs
Strobilanthes tonkinensis	Acanthaceae	Lamiales	Angiosperm	Strobilanthes	tonkinensis	Lao	MAs	Sun	MAs
Strobilanthes torrentium	Acanthaceae	Lamiales	Angiosperm	Strobilanthes	torrentium	Lao	MAs	Sun	MAs
Strobilanthes torrentium	Acanthaceae	Lamiales	Angiosperm	Strobilanthes	torrentium	Myn	MAs	Sun	MAs
Strobilanthes tubiflos	Acanthaceae	Lamiales	Angiosperm	Strobilanthes	tubiflos	Myn	MAs	Sun	MAs
Strobilanthes urophylla	Acanthaceae	Lamiales	Angiosperm	Strobilanthes	urophylla	Lao	MAs	Sun	MAs
Strobilanthes wardiana	Acanthaceae	Lamiales	Angiosperm	Strobilanthes	wardiana	Myn	MAs	Sun	MAs
Strobilanthes yunnanensis	Acanthaceae	Lamiales	Angiosperm	Strobilanthes	yunnanensis	Myn	MAs	Sun	MAs
Strobilanthus pluriformis	Acanthaceae	Lamiales	Angiosperm	Strobilanthus	pluriformis	Phi	Phi	Wal	Phi
Synnema biplicatum	Acanthaceae	Lamiales	Angiosperm	Synnema	biplicatum	Myn	MAs	Sun	MAs
Thunbergia affinis	Acanthaceae	Lamiales	Angiosperm	Thunbergia	affinis	Myn	MAs	Sun	MAs
Thunbergia alata	Acanthaceae	Lamiales	Angiosperm	Thunbergia	alata	Ind/PNG	NGu	Sah	NGu
Thunbergia alata	Acanthaceae	Lamiales	Angiosperm	Thunbergia	alata	Ind	Jav	Sun	Jav
Thunbergia alata	Acanthaceae	Lamiales	Angiosperm	Thunbergia	alata	Ind/Mly/Bru	Bor	Sun	Bor
Thunbergia alata	Acanthaceae	Lamiales	Angiosperm	Thunbergia	alata	Mly	MAs	Sun	MAs
Thunbergia alata	Acanthaceae	Lamiales	Angiosperm	Thunbergia	alata	Myn	MAs	Sun	MAs
Thunbergia alata	Acanthaceae	Lamiales	Angiosperm	Thunbergia	alata	Sin	MAs	Sun	MAs
Thunbergia alata	Acanthaceae	Lamiales	Angiosperm	Thunbergia	alata	Ind/Tim	LSI	Wal	LSI
Thunbergia alata	Acanthaceae	Lamiales	Angiosperm	Thunbergia	alata	Phi	Phi	Wal	Phi
Thunbergia arnhemica	Acanthaceae	Lamiales	Angiosperm	Thunbergia	arnhemica	Aus	Aus	Sah	AU Arnhem Land
Thunbergia arnhemica	Acanthaceae	Lamiales	Angiosperm	Thunbergia	arnhemica	Aus	Aus	Sah	AU Atherton Plateau
Thunbergia arnhemica	Acanthaceae	Lamiales	Angiosperm	Thunbergia	arnhemica	Aus	Aus	Sah	AU Cape York Peninsula
Thunbergia arnhemica	Acanthaceae	Lamiales	Angiosperm	Thunbergia	arnhemica	Aus	Aus	Sah	AU Eastern Queensland
Thunbergia arnhemica	Acanthaceae	Lamiales	Angiosperm	Thunbergia	arnhemica	Aus	Aus	Sah	AU Kimberley Plateau
Thunbergia battiscombei	Acanthaceae	Lamiales	Angiosperm	Thunbergia	battiscombei	Sin	MAs	Sun	MAs
Thunbergia benguettensis	Acanthaceae	Lamiales	Angiosperm	Thunbergia	benguettensis	Phi	Phi	Wal	Phi
Thunbergia brachypoda	Acanthaceae	Lamiales	Angiosperm	Thunbergia	brachypoda	Phi	Phi	Wal	Phi
Thunbergia brachytyla	Acanthaceae	Lamiales	Angiosperm	Thunbergia	brachytyla	Phi	Phi	Wal	Phi
Thunbergia coccinea	Acanthaceae	Lamiales	Angiosperm	Thunbergia	coccinea	Lao	MAs	Sun	MAs
Thunbergia coccinea	Acanthaceae	Lamiales	Angiosperm	Thunbergia	coccinea	Myn	MAs	Sun	MAs
Thunbergia coccinea	Acanthaceae	Lamiales	Angiosperm	Thunbergia	coccinea	Tha	MAs	Sun	MAs
Thunbergia dasychlamys	Acanthaceae	Lamiales	Angiosperm	Thunbergia	dasychlamys	Mly	MAs	Sun	MAs
Thunbergia eberhardtii	Acanthaceae	Lamiales	Angiosperm	Thunbergia	eberhardtii	Lao	MAs	Sun	MAs
Thunbergia erecta	Acanthaceae	Lamiales	Angiosperm	Thunbergia	erecta	Sin	MAs	Sun	MAs
Thunbergia erecta	Acanthaceae	Lamiales	Angiosperm	Thunbergia	erecta	Tha	MAs	Sun	MAs
Thunbergia erecta	Acanthaceae	Lamiales	Angiosperm	Thunbergia	erecta	Ind	Mlk	Wal	Mlk
Thunbergia erecta	Acanthaceae	Lamiales	Angiosperm	Thunbergia	erecta	Phi	Phi	Wal	Phi
Thunbergia fragrans	Acanthaceae	Lamiales	Angiosperm	Thunbergia	fragrans	Ind/PNG	NGu	Sah	NGu
Thunbergia fragrans	Acanthaceae	Lamiales	Angiosperm	Thunbergia	fragrans	Cam	MAs	Sun	MAs
Thunbergia fragrans	Acanthaceae	Lamiales	Angiosperm	Thunbergia	fragrans	Ind/Mly/Bru	Bor	Sun	Bor
Thunbergia fragrans	Acanthaceae	Lamiales	Angiosperm	Thunbergia	fragrans	Lao	MAs	Sun	MAs
Thunbergia fragrans	Acanthaceae	Lamiales	Angiosperm	Thunbergia	fragrans	Myn	MAs	Sun	MAs
Thunbergia fragrans	Acanthaceae	Lamiales	Angiosperm	Thunbergia	fragrans	Sin	MAs	Sun	MAs
Thunbergia fragrans	Acanthaceae	Lamiales	Angiosperm	Thunbergia	fragrans	Vie	MAs	Sun	MAs
Thunbergia fragrans	Acanthaceae	Lamiales	Angiosperm	Thunbergia	fragrans	Ind/Tim	LSI	Wal	LSI
Thunbergia fragrans	Acanthaceae	Lamiales	Angiosperm	Thunbergia	fragrans	Phi	Phi	Wal	Phi
Thunbergia geoffrayi	Acanthaceae	Lamiales	Angiosperm	Thunbergia	geoffrayi	Lao	Mas	Sun	Mas
Thunbergia grandiflora	Acanthaceae	Lamiales	Angiosperm	Thunbergia	grandiflora	Ind/PNG	NGu	Sah	NGu
Thunbergia grandiflora	Acanthaceae	Lamiales	Angiosperm	Thunbergia	grandiflora	Lao	MAs	Sun	MAs
Thunbergia grandiflora	Acanthaceae	Lamiales	Angiosperm	Thunbergia	grandiflora	Mly	MAs	Sun	MAs
Thunbergia grandiflora	Acanthaceae	Lamiales	Angiosperm	Thunbergia	grandiflora	Myn	MAs	Sun	MAs
Thunbergia grandiflora	Acanthaceae	Lamiales	Angiosperm	Thunbergia	grandiflora	Sin	MAs	Sun	MAs
Thunbergia grandiflora	Acanthaceae	Lamiales	Angiosperm	Thunbergia	grandiflora	Phi	Phi	Wal	Phi
Thunbergia hossei	Acanthaceae	Lamiales	Angiosperm	Thunbergia	hossei	Lao	Mas	Sun	Mas
Thunbergia hossei	Acanthaceae	Lamiales	Angiosperm	Thunbergia	hossei	Myn	MAs	Sun	MAs
Thunbergia ilocana	Acanthaceae	Lamiales	Angiosperm	Thunbergia	ilocana	Phi	Phi	Wal	Phi
Thunbergia kirkii	Acanthaceae	Lamiales	Angiosperm	Thunbergia	kirkii	Sin	MAs	Sun	MAs
Thunbergia laurifolia	Acanthaceae	Lamiales	Angiosperm	Thunbergia	laurifolia	Ind/PNG	NGu	Sah	NGu
Thunbergia laurifolia	Acanthaceae	Lamiales	Angiosperm	Thunbergia	laurifolia	Lao	MAs	Sun	MAs
Thunbergia laurifolia	Acanthaceae	Lamiales	Angiosperm	Thunbergia	laurifolia	Mly	MAs	Sun	MAs
Thunbergia laurifolia	Acanthaceae	Lamiales	Angiosperm	Thunbergia	laurifolia	Myn	MAs	Sun	MAs
Thunbergia laurifolia	Acanthaceae	Lamiales	Angiosperm	Thunbergia	laurifolia	Sin	MAs	Sun	MAs
Thunbergia lutea	Acanthaceae	Lamiales	Angiosperm	Thunbergia	lutea	Myn	MAs	Sun	MAs
Thunbergia similis	Acanthaceae	Lamiales	Angiosperm	Thunbergia	similis	Lao	Mas	Sun	Mas
Whitfieldia elongata	Acanthaceae	Lamiales	Angiosperm	Whitfieldia	elongata	Sin	MAs	Sun	MAs
Xerothamnella herbacea	Acanthaceae	Lamiales	Angiosperm	Xerothamnella	herbacea	Aus	Aus	Sah	AU Eastern Desert
Xerothamnella herbacea	Acanthaceae	Lamiales	Angiosperm	Xerothamnella	herbacea	Aus	Aus	Sah	AU Eastern Queensland
Xerothamnella parvifolia	Acanthaceae	Lamiales	Angiosperm	Xerothamnella	parvifolia	Aus	Aus	Sah	AU Central Queensland
Xerothamnella parvifolia	Acanthaceae	Lamiales	Angiosperm	Xerothamnella	parvifolia	Aus	Aus	Sah	AU Eastern Desert
Ahernia glandulosa	Achariaceae	Malpighiales	Angiosperm	Ahernia	glandulosa	Phi	Phi	Wal	Phi
Baileyoxylon lanceolatum	Achariaceae	Malpighiales	Angiosperm	Baileyoxylon	lanceolatum	Aus	Aus	Sah	AU Atherton Plateau
Chlorocarpa pentaschista	Achariaceae	Malpighiales	Angiosperm	Chlorocarpa	pentaschista	Tha	MAs	Sun	MAs
Eleutherandra pes-cervi	Achariaceae	Malpighiales	Angiosperm	Eleutherandra	pes-cervi	Ind/Mly/Bru	Bor	Sun	Bor
Eleutherandra pes-cervi	Achariaceae	Malpighiales	Angiosperm	Eleutherandra	pes-cervi	Phi	Phi	Wal	Phi
Erythrospermum candidum	Achariaceae	Malpighiales	Angiosperm	Erythrospermum	candidum	Ind/PNG	NGu	Sah	NGu
Erythrospermum candidum	Achariaceae	Malpighiales	Angiosperm	Erythrospermum	candidum	PNG	NGu	Sah	NGu
Erythrospermum candidum	Achariaceae	Malpighiales	Angiosperm	Erythrospermum	candidum	Mly	MAs	Sun	MAs
Erythrospermum candidum	Achariaceae	Malpighiales	Angiosperm	Erythrospermum	candidum	Ind	Sul	Wal	Sul
Gynocardia odorata	Achariaceae	Malpighiales	Angiosperm	Gynocardia	odorata	Myn	MAs	Sun	MAs
Gynocardia odorata	Achariaceae	Malpighiales	Angiosperm	Gynocardia	odorata	Tha	MAs	Sun	MAs
Hydnocarpus alcalae	Achariaceae	Malpighiales	Angiosperm	Hydnocarpus	alcalae	Phi	Phi	Wal	Phi
Hydnocarpus annamensis	Achariaceae	Malpighiales	Angiosperm	Hydnocarpus	annamensis	Cam	MAs	Sun	MAs
Hydnocarpus annamensis	Achariaceae	Malpighiales	Angiosperm	Hydnocarpus	annamensis	Ind	Sum	Sun	Sum
Hydnocarpus annamensis	Achariaceae	Malpighiales	Angiosperm	Hydnocarpus	annamensis	Vie	MAs	Sun	MAs
Hydnocarpus anthelminthica	Achariaceae	Malpighiales	Angiosperm	Hydnocarpus	anthelminthica	Lao	Mas	Sun	Mas
Hydnocarpus anthelminthicus	Achariaceae	Malpighiales	Angiosperm	Hydnocarpus	anthelminthicus	Cam	MAs	Sun	MAs
Hydnocarpus anthelminthicus	Achariaceae	Malpighiales	Angiosperm	Hydnocarpus	anthelminthicus	Lao	MAs	Sun	MAs
Hydnocarpus anthelminthicus	Achariaceae	Malpighiales	Angiosperm	Hydnocarpus	anthelminthicus	Sin	MAs	Sun	MAs
Hydnocarpus anthelminthicus	Achariaceae	Malpighiales	Angiosperm	Hydnocarpus	anthelminthicus	Tha	MAs	Sun	MAs
Hydnocarpus anthelminthicus	Achariaceae	Malpighiales	Angiosperm	Hydnocarpus	anthelminthicus	Vie	MAs	Sun	MAs
Hydnocarpus borneensis	Achariaceae	Malpighiales	Angiosperm	Hydnocarpus	borneensis	Bru	Bor	Sun	Bor
Hydnocarpus borneensis	Achariaceae	Malpighiales	Angiosperm	Hydnocarpus	borneensis	Mly	MAs	Sun	MAs
Hydnocarpus castanea	Achariaceae	Malpighiales	Angiosperm	Hydnocarpus	castanea	Ind	Bor	Sun	Bor
Hydnocarpus castanea	Achariaceae	Malpighiales	Angiosperm	Hydnocarpus	castanea	Mly	MAs	Sun	MAs
Hydnocarpus castanea	Achariaceae	Malpighiales	Angiosperm	Hydnocarpus	castanea	Myn	MAs	Sun	MAs
Hydnocarpus castanea	Achariaceae	Malpighiales	Angiosperm	Hydnocarpus	castanea	Sin	MAs	Sun	MAs
Hydnocarpus cauliflora	Achariaceae	Malpighiales	Angiosperm	Hydnocarpus	cauliflora	Phi	Phi	Wal	Phi
Hydnocarpus elmeri	Achariaceae	Malpighiales	Angiosperm	Hydnocarpus	elmeri	Bru	Bor	Sun	Bor
Hydnocarpus filipes	Achariaceae	Malpighiales	Angiosperm	Hydnocarpus	filipes	Mly	MAs	Sun	MAs
Hydnocarpus glaucescens	Achariaceae	Malpighiales	Angiosperm	Hydnocarpus	glaucescens	Ind	Sum	Sun	Sum
Hydnocarpus gracilis	Achariaceae	Malpighiales	Angiosperm	Hydnocarpus	gracilis	Ind	Sum	Sun	Sum
Hydnocarpus heterophylla	Achariaceae	Malpighiales	Angiosperm	Hydnocarpus	heterophylla	Phi	Phi	Wal	Phi
Hydnocarpus ilicifolia	Achariaceae	Malpighiales	Angiosperm	Hydnocarpus	ilicifolia	Lao	Mas	Sun	Mas
Hydnocarpus ilicifolia	Achariaceae	Malpighiales	Angiosperm	Hydnocarpus	ilicifolia	Vie	MAs	Sun	MAs
Hydnocarpus kingii	Achariaceae	Malpighiales	Angiosperm	Hydnocarpus	kingii	Ind/Mly/Bru	Bor	Sun	Bor
Hydnocarpus kingii	Achariaceae	Malpighiales	Angiosperm	Hydnocarpus	kingii	Mly	MAs	Sun	MAs
Hydnocarpus kunstleri	Achariaceae	Malpighiales	Angiosperm	Hydnocarpus	kunstleri	Bru	Bor	Sun	Bor
Hydnocarpus kurzii	Achariaceae	Malpighiales	Angiosperm	Hydnocarpus	kurzii	Cam	MAs	Sun	MAs
Hydnocarpus kurzii	Achariaceae	Malpighiales	Angiosperm	Hydnocarpus	kurzii	Lao	MAs	Sun	MAs
Hydnocarpus kurzii	Achariaceae	Malpighiales	Angiosperm	Hydnocarpus	kurzii	Mly	MAs	Sun	MAs
Hydnocarpus kurzii	Achariaceae	Malpighiales	Angiosperm	Hydnocarpus	kurzii	Myn	MAs	Sun	MAs
Hydnocarpus kurzii	Achariaceae	Malpighiales	Angiosperm	Hydnocarpus	kurzii	Tha	MAs	Sun	MAs
Hydnocarpus kurzii	Achariaceae	Malpighiales	Angiosperm	Hydnocarpus	kurzii	Vie	MAs	Sun	MAs
Hydnocarpus pentagynus	Achariaceae	Malpighiales	Angiosperm	Hydnocarpus	pentagynus	Ind	Bor	Sun	Bor
Hydnocarpus pinguis	Achariaceae	Malpighiales	Angiosperm	Hydnocarpus	pinguis	Ind	Bor	Sun	Bor
Hydnocarpus pinguis	Achariaceae	Malpighiales	Angiosperm	Hydnocarpus	pinguis	Bru	Bor	Sun	Bor
Hydnocarpus polypetala	Achariaceae	Malpighiales	Angiosperm	Hydnocarpus	polypetala	Bru	Bor	Sun	Bor
Hydnocarpus polypetalus	Achariaceae	Malpighiales	Angiosperm	Hydnocarpus	polypetalus	Ind	Bor	Sun	Bor
Hydnocarpus polypetalus	Achariaceae	Malpighiales	Angiosperm	Hydnocarpus	polypetalus	Phi	Phi	Wal	Phi
Hydnocarpus subfalcata	Achariaceae	Malpighiales	Angiosperm	Hydnocarpus	subfalcata	Ind	Bor	Sun	Bor
Hydnocarpus subfalcata	Achariaceae	Malpighiales	Angiosperm	Hydnocarpus	subfalcata	Bru	Bor	Sun	Bor
Hydnocarpus subfalcata	Achariaceae	Malpighiales	Angiosperm	Hydnocarpus	subfalcata	Phi	Phi	Wal	Phi
Hydnocarpus sumatrana	Achariaceae	Malpighiales	Angiosperm	Hydnocarpus	sumatrana	Ind	Bor	Sun	Bor
Hydnocarpus sumatrana	Achariaceae	Malpighiales	Angiosperm	Hydnocarpus	sumatrana	Bru	Bor	Sun	Bor
Hydnocarpus tenuipetalus	Achariaceae	Malpighiales	Angiosperm	Hydnocarpus	tenuipetalus	Ind	Bor	Sun	Bor
Hydnocarpus woodii	Achariaceae	Malpighiales	Angiosperm	Hydnocarpus	woodii	Ind	Bor	Sun	Bor
Hydnocarpus woodii	Achariaceae	Malpighiales	Angiosperm	Hydnocarpus	woodii	Mly	MAs	Sun	MAs
Hydnocarpus woodii	Achariaceae	Malpighiales	Angiosperm	Hydnocarpus	woodii	Ind	Sum	Sun	Sum
Hydnocarpus woodii	Achariaceae	Malpighiales	Angiosperm	Hydnocarpus	woodii	Bru	Bor	Sun	Bor
Hydnocarpus wrayi	Achariaceae	Malpighiales	Angiosperm	Hydnocarpus	wrayi	Ind	Bor	Sun	Bor
Hydnocarpus wrayi	Achariaceae	Malpighiales	Angiosperm	Hydnocarpus	wrayi	Ind	Sum	Sun	Sum
Pangium edule	Achariaceae	Malpighiales	Angiosperm	Pangium	edule	Ind/PNG	NGu	Sah	NGu
Pangium edule	Achariaceae	Malpighiales	Angiosperm	Pangium	edule	PNG	NGu	Sah	NGu
Pangium edule	Achariaceae	Malpighiales	Angiosperm	Pangium	edule	Ind	Sum	Sun	Sum
Pangium edule	Achariaceae	Malpighiales	Angiosperm	Pangium	edule	Ind/Mly/Bru	Bor	Sun	Bor
Pangium edule	Achariaceae	Malpighiales	Angiosperm	Pangium	edule	Mly	MAs	Sun	MAs
Pangium edule	Achariaceae	Malpighiales	Angiosperm	Pangium	edule	Sin	MAs	Sun	MAs
Pangium edule	Achariaceae	Malpighiales	Angiosperm	Pangium	edule	Ind	Mlk	Wal	Mlk
Pangium edule	Achariaceae	Malpighiales	Angiosperm	Pangium	edule	Ind	Sul	Wal	Sul
Pangium edule	Achariaceae	Malpighiales	Angiosperm	Pangium	edule	Phi	Phi	Wal	Phi
Ryparosa acuminata	Achariaceae	Malpighiales	Angiosperm	Ryparosa	acuminata	Ind	Bor	Sun	Bor
Ryparosa acuminata	Achariaceae	Malpighiales	Angiosperm	Ryparosa	acuminata	Mly	MAs	Sun	MAs
Ryparosa acuminata	Achariaceae	Malpighiales	Angiosperm	Ryparosa	acuminata	Bru	Bor	Sun	Bor
Ryparosa baccaureoides	Achariaceae	Malpighiales	Angiosperm	Ryparosa	baccaureoides	Ind	Bor	Sun	Bor
Ryparosa baccaurioides	Achariaceae	Malpighiales	Angiosperm	Ryparosa	baccaurioides	Bru	Bor	Sun	Bor
Ryparosa caesia	Achariaceae	Malpighiales	Angiosperm	Ryparosa	caesia	Ind	Sum	Sun	Sum
Ryparosa calotricha	Achariaceae	Malpighiales	Angiosperm	Ryparosa	calotricha	Ind/PNG	NGu	Sah	NGu
Ryparosa cauliflora	Achariaceae	Malpighiales	Angiosperm	Ryparosa	cauliflora	Phi	Phi	Wal	Phi
Ryparosa fasciculata	Achariaceae	Malpighiales	Angiosperm	Ryparosa	fasciculata	Ind	Bor	Sun	Bor
Ryparosa fasciculata	Achariaceae	Malpighiales	Angiosperm	Ryparosa	fasciculata	Mly	MAs	Sun	MAs
Ryparosa fasciculata	Achariaceae	Malpighiales	Angiosperm	Ryparosa	fasciculata	Phi	Phi	Wal	Phi
Ryparosa hirsuta	Achariaceae	Malpighiales	Angiosperm	Ryparosa	hirsuta	Ind	Bor	Sun	Bor
Ryparosa hirsuta	Achariaceae	Malpighiales	Angiosperm	Ryparosa	hirsuta	Bru	Bor	Sun	Bor
Ryparosa hullettii	Achariaceae	Malpighiales	Angiosperm	Ryparosa	hullettii	Ind	Bor	Sun	Bor
Ryparosa hullettii	Achariaceae	Malpighiales	Angiosperm	Ryparosa	hullettii	Mly	MAs	Sun	MAs
Ryparosa hullettii	Achariaceae	Malpighiales	Angiosperm	Ryparosa	hullettii	Sin	MAs	Sun	MAs
Ryparosa hullettii	Achariaceae	Malpighiales	Angiosperm	Ryparosa	hullettii	Bru	Bor	Sun	Bor
Ryparosa hullettii	Achariaceae	Malpighiales	Angiosperm	Ryparosa	hullettii	Phi	Phi	Wal	Phi
Ryparosa javanica	Achariaceae	Malpighiales	Angiosperm	Ryparosa	javanica	Ind	Bor	Sun	Bor
Ryparosa javanica	Achariaceae	Malpighiales	Angiosperm	Ryparosa	javanica	Ind	Sul	Wal	Sul
Ryparosa kingii	Achariaceae	Malpighiales	Angiosperm	Ryparosa	kingii	Mly	MAs	Sun	MAs
Ryparosa kostermansii	Achariaceae	Malpighiales	Angiosperm	Ryparosa	kostermansii	Ind	Bor	Sun	Bor
Ryparosa kostermansii	Achariaceae	Malpighiales	Angiosperm	Ryparosa	kostermansii	Bru	Bor	Sun	Bor
Ryparosa kunstleri	Achariaceae	Malpighiales	Angiosperm	Ryparosa	kunstleri	Ind	Bor	Sun	Bor
Ryparosa kunstleri	Achariaceae	Malpighiales	Angiosperm	Ryparosa	kunstleri	Mly	MAs	Sun	MAs
Ryparosa kunstleri	Achariaceae	Malpighiales	Angiosperm	Ryparosa	kunstleri	Ind	Sum	Sun	Sum
Ryparosa kurrangii	Achariaceae	Malpighiales	Angiosperm	Ryparosa	kurrangii	Aus	Aus	Sah	AU Atherton Plateau
Ryparosa kurrangii	Achariaceae	Malpighiales	Angiosperm	Ryparosa	kurrangii	Aus	Aus	Sah	AU External Territories
Ryparosa multinervosa	Achariaceae	Malpighiales	Angiosperm	Ryparosa	multinervosa	Ind	Sum	Sun	Sum
Ryparosa scortechinii	Achariaceae	Malpighiales	Angiosperm	Ryparosa	scortechinii	Sin	MAs	Sun	MAs
Ryparosa scortechinii	Achariaceae	Malpighiales	Angiosperm	Ryparosa	scortechinii	Ind	Sum	Sun	Sum
Ryparosa sumatrana	Achariaceae	Malpighiales	Angiosperm	Ryparosa	sumatrana	Ind	Bor	Sun	Bor
Ryparosa sumatrana	Achariaceae	Malpighiales	Angiosperm	Ryparosa	sumatrana	Ind/Mly/Bru	Bor	Sun	Bor
Ryparosa sumatrana	Achariaceae	Malpighiales	Angiosperm	Ryparosa	sumatrana	Ind	Sul	Wal	Sul
Ryparosa sumatrana	Achariaceae	Malpighiales	Angiosperm	Ryparosa	sumatrana	Phi	Phi	Wal	Phi
Ryparosa wallichii	Achariaceae	Malpighiales	Angiosperm	Ryparosa	wallichii	Mly	MAs	Sun	MAs
Scaphocalyx spathacea	Achariaceae	Malpighiales	Angiosperm	Scaphocalyx	spathacea	Mly	MAs	Sun	MAs
Taraktogenos calophyllum	Achariaceae	Malpighiales	Angiosperm	Taraktogenos	calophyllum	Ind	Bor	Sun	Bor
Taraktogenos calophyllum	Achariaceae	Malpighiales	Angiosperm	Taraktogenos	calophyllum	Ind/Mly/Bru	Bor	Sun	Bor
Taraktogenos kunstleri	Achariaceae	Malpighiales	Angiosperm	Taraktogenos	kunstleri	Ind	Bor	Sun	Bor
Taraktogenos kunstleri	Achariaceae	Malpighiales	Angiosperm	Taraktogenos	kunstleri	Ind	Sum	Sun	Sum
Taraktogenos kunstleri	Achariaceae	Malpighiales	Angiosperm	Taraktogenos	kunstleri	Ind/Mly/Bru	Bor	Sun	Bor
Taraktogenos kunstleri	Achariaceae	Malpighiales	Angiosperm	Taraktogenos	kunstleri	Mly	MAs	Sun	MAs
Trichadenia philippinensis	Achariaceae	Malpighiales	Angiosperm	Trichadenia	philippinensis	Ind/PNG	NGu	Sah	NGu
Trichadenia philippinensis	Achariaceae	Malpighiales	Angiosperm	Trichadenia	philippinensis	Ind	Bor	Sun	Bor
Trichadenia philippinensis	Achariaceae	Malpighiales	Angiosperm	Trichadenia	philippinensis	Bru	Bor	Sun	Bor
Trichadenia philippinensis	Achariaceae	Malpighiales	Angiosperm	Trichadenia	philippinensis	Phi	Phi	Wal	Phi
Acorus calamus	Acoraceae	Acorales	Angiosperm	Acorus	calamus	Ind/PNG	NGu	Sah	NGu
Acorus calamus	Acoraceae	Acorales	Angiosperm	Acorus	calamus	Ind	Jav	Sun	Jav
Acorus calamus	Acoraceae	Acorales	Angiosperm	Acorus	calamus	Lao	MAs	Sun	MAs
Acorus calamus	Acoraceae	Acorales	Angiosperm	Acorus	calamus	Myn	MAs	Sun	MAs
Acorus calamus	Acoraceae	Acorales	Angiosperm	Acorus	calamus	Tha	MAs	Sun	MAs
Acorus calamus	Acoraceae	Acorales	Angiosperm	Acorus	calamus	Phi	Phi	Wal	Phi
Acorus gramineus	Acoraceae	Acorales	Angiosperm	Acorus	gramineus	Lao	MAs	Sun	MAs
Acorus gramineus	Acoraceae	Acorales	Angiosperm	Acorus	gramineus	Myn	MAs	Sun	MAs
Acorus gramineus	Acoraceae	Acorales	Angiosperm	Acorus	gramineus	Sin	MAs	Sun	MAs
Acorus gramineus	Acoraceae	Acorales	Angiosperm	Acorus	gramineus	Tha	MAs	Sun	MAs
Acorus gramineus	Acoraceae	Acorales	Angiosperm	Acorus	gramineus	Phi	Phi	Wal	Phi
Actinidia callosa	Actinidiaceae	Ericales	Angiosperm	Actinidia	callosa	Ind	Sum	Sun	Sum
Actinidia callosa	Actinidiaceae	Ericales	Angiosperm	Actinidia	callosa	Mly	MAs	Sun	MAs
Actinidia latifolia	Actinidiaceae	Ericales	Angiosperm	Actinidia	latifolia	Cam	MAs	Sun	MAs
Actinidia latifolia	Actinidiaceae	Ericales	Angiosperm	Actinidia	latifolia	Lao	MAs	Sun	MAs
Actinidia latifolia	Actinidiaceae	Ericales	Angiosperm	Actinidia	latifolia	Mly	MAs	Sun	MAs
Actinidia latifolia	Actinidiaceae	Ericales	Angiosperm	Actinidia	latifolia	Vie	MAs	Sun	MAs
Saurauia alvarezii	Actinidiaceae	Ericales	Angiosperm	Saurauia	alvarezii	Phi	Phi	Wal	Phi
Saurauia ampla	Actinidiaceae	Ericales	Angiosperm	Saurauia	ampla	Phi	Phi	Wal	Phi
Saurauia andreana	Actinidiaceae	Ericales	Angiosperm	Saurauia	andreana	Aus	Aus	Sah	AU Atherton Plateau
Saurauia avellana	Actinidiaceae	Ericales	Angiosperm	Saurauia	avellana	Phi	Phi	Wal	Phi
Saurauia bakeri	Actinidiaceae	Ericales	Angiosperm	Saurauia	bakeri	Phi	Phi	Wal	Phi
Saurauia bicolor	Actinidiaceae	Ericales	Angiosperm	Saurauia	bicolor	Phi	Phi	Wal	Phi
Saurauia blumia	Actinidiaceae	Ericales	Angiosperm	Saurauia	blumia	Ind	Jav	Sun	Jav
Saurauia blumia	Actinidiaceae	Ericales	Angiosperm	Saurauia	blumia	Ind	Sum	Sun	Sum
Saurauia blumia	Actinidiaceae	Ericales	Angiosperm	Saurauia	blumia	Ind/Mly/Bru	Bor	Sun	Bor
Saurauia blumia	Actinidiaceae	Ericales	Angiosperm	Saurauia	blumia	Ind	Sul	Wal	Sul
Saurauia blumia	Actinidiaceae	Ericales	Angiosperm	Saurauia	blumia	Ind	Mlk	Wal	Mlk
Saurauia blumiana	Actinidiaceae	Ericales	Angiosperm	Saurauia	blumiana	Ind	Jav	Sun	Jav
Saurauia bontocensis	Actinidiaceae	Ericales	Angiosperm	Saurauia	bontocensis	Phi	Phi	Wal	Phi
Saurauia borneensis	Actinidiaceae	Ericales	Angiosperm	Saurauia	borneensis	Bru	Bor	Sun	Bor
Saurauia bracteosa	Actinidiaceae	Ericales	Angiosperm	Saurauia	bracteosa	Ind	Jav	Sun	Jav
Saurauia bruneiensis	Actinidiaceae	Ericales	Angiosperm	Saurauia	bruneiensis	Bru	Bor	Sun	Bor
Saurauia cauliflora	Actinidiaceae	Ericales	Angiosperm	Saurauia	cauliflora	Ind	Sum	Sun	Sum
Saurauia cinnamomea	Actinidiaceae	Ericales	Angiosperm	Saurauia	cinnamomea	Phi	Phi	Wal	Phi
Saurauia clementis	Actinidiaceae	Ericales	Angiosperm	Saurauia	clementis	Phi	Phi	Wal	Phi
Saurauia conferta	Actinidiaceae	Ericales	Angiosperm	Saurauia	conferta	PNG	NGu	Sah	NGu
Saurauia confusa	Actinidiaceae	Ericales	Angiosperm	Saurauia	confusa	Phi	Phi	Wal	Phi
Saurauia congestiflora	Actinidiaceae	Ericales	Angiosperm	Saurauia	congestiflora	Phi	Phi	Wal	Phi
Saurauia copelandii	Actinidiaceae	Ericales	Angiosperm	Saurauia	copelandii	Phi	Phi	Wal	Phi
Saurauia cordata	Actinidiaceae	Ericales	Angiosperm	Saurauia	cordata	Phi	Phi	Wal	Phi
Saurauia denticulata	Actinidiaceae	Ericales	Angiosperm	Saurauia	denticulata	Phi	Phi	Wal	Phi
Saurauia elmeri	Actinidiaceae	Ericales	Angiosperm	Saurauia	elmeri	Phi	Phi	Wal	Phi
Saurauia erythrothrica	Actinidiaceae	Ericales	Angiosperm	Saurauia	erythrothrica	Phi	Phi	Wal	Phi
Saurauia fasciculiflora	Actinidiaceae	Ericales	Angiosperm	Saurauia	fasciculiflora	Phi	Phi	Wal	Phi
Saurauia gigantifolia	Actinidiaceae	Ericales	Angiosperm	Saurauia	gigantifolia	Phi	Phi	Wal	Phi
Saurauia glabra	Actinidiaceae	Ericales	Angiosperm	Saurauia	glabra	Ind	Bor	Sun	Bor
Saurauia glabra	Actinidiaceae	Ericales	Angiosperm	Saurauia	glabra	Ind	Sum	Sun	Sum
Saurauia glabra	Actinidiaceae	Ericales	Angiosperm	Saurauia	glabra	Ind/Mly/Bru	Bor	Sun	Bor
Saurauia glabra	Actinidiaceae	Ericales	Angiosperm	Saurauia	glabra	Ind	Sul	Wal	Sul
Saurauia glabrifolia	Actinidiaceae	Ericales	Angiosperm	Saurauia	glabrifolia	Phi	Phi	Wal	Phi
Saurauia gracilipes	Actinidiaceae	Ericales	Angiosperm	Saurauia	gracilipes	Phi	Phi	Wal	Phi
Saurauia homotricha	Actinidiaceae	Ericales	Angiosperm	Saurauia	homotricha	Ind/PNG	NGu	Sah	NGu
Saurauia hooglandii	Actinidiaceae	Ericales	Angiosperm	Saurauia	hooglandii	Bru	Bor	Sun	Bor
Saurauia horrida	Actinidiaceae	Ericales	Angiosperm	Saurauia	horrida	Bru	Bor	Sun	Bor
Saurauia involucrata	Actinidiaceae	Ericales	Angiosperm	Saurauia	involucrata	Phi	Phi	Wal	Phi
Saurauia javanica	Actinidiaceae	Ericales	Angiosperm	Saurauia	javanica	Bru	Bor	Sun	Bor
Saurauia kinabaluensis	Actinidiaceae	Ericales	Angiosperm	Saurauia	kinabaluensis	Bru	Bor	Sun	Bor
Saurauia klemmei	Actinidiaceae	Ericales	Angiosperm	Saurauia	klemmei	Phi	Phi	Wal	Phi
Saurauia knemifolia	Actinidiaceae	Ericales	Angiosperm	Saurauia	knemifolia	Phi	Phi	Wal	Phi
Saurauia latibractea	Actinidiaceae	Ericales	Angiosperm	Saurauia	latibractea	Phi	Phi	Wal	Phi
Saurauia laxiflora	Actinidiaceae	Ericales	Angiosperm	Saurauia	laxiflora	Phi	Phi	Wal	Phi
Saurauia leytensis	Actinidiaceae	Ericales	Angiosperm	Saurauia	leytensis	Phi	Phi	Wal	Phi
Saurauia longistyla	Actinidiaceae	Ericales	Angiosperm	Saurauia	longistyla	Bru	Bor	Sun	Bor
Saurauia longistyla	Actinidiaceae	Ericales	Angiosperm	Saurauia	longistyla	Phi	Phi	Wal	Phi
Saurauia luzoniensis	Actinidiaceae	Ericales	Angiosperm	Saurauia	luzoniensis	Phi	Phi	Wal	Phi
Saurauia macgregorii	Actinidiaceae	Ericales	Angiosperm	Saurauia	macgregorii	Phi	Phi	Wal	Phi
Saurauia macrotricha	Actinidiaceae	Ericales	Angiosperm	Saurauia	macrotricha	Myn	MAs	Sun	MAs
Saurauia merrillii	Actinidiaceae	Ericales	Angiosperm	Saurauia	merrillii	Phi	Phi	Wal	Phi
Saurauia montana	Actinidiaceae	Ericales	Angiosperm	Saurauia	montana	Ind/PNG	NGu	Sah	NGu
Saurauia napaulensis	Actinidiaceae	Ericales	Angiosperm	Saurauia	napaulensis	Lao	MAs	Sun	MAs
Saurauia napaulensis	Actinidiaceae	Ericales	Angiosperm	Saurauia	napaulensis	Mly	MAs	Sun	MAs
Saurauia napaulensis	Actinidiaceae	Ericales	Angiosperm	Saurauia	napaulensis	Myn	MAs	Sun	MAs
Saurauia napaulensis	Actinidiaceae	Ericales	Angiosperm	Saurauia	napaulensis	Vie	MAs	Sun	MAs
Saurauia negrosensis	Actinidiaceae	Ericales	Angiosperm	Saurauia	negrosensis	Phi	Phi	Wal	Phi
Saurauia nudiflora	Actinidiaceae	Ericales	Angiosperm	Saurauia	nudiflora	Ind	Bor	Sun	Bor
Saurauia nudiflora	Actinidiaceae	Ericales	Angiosperm	Saurauia	nudiflora	Mly	MAs	Sun	MAs
Saurauia nudiflora	Actinidiaceae	Ericales	Angiosperm	Saurauia	nudiflora	Ind	Sum	Sun	Sum
Saurauia oblancilimba	Actinidiaceae	Ericales	Angiosperm	Saurauia	oblancilimba	Phi	Phi	Wal	Phi
Saurauia oligantha	Actinidiaceae	Ericales	Angiosperm	Saurauia	oligantha	Phi	Phi	Wal	Phi
Saurauia oligophlebia	Actinidiaceae	Ericales	Angiosperm	Saurauia	oligophlebia	Phi	Phi	Wal	Phi
Saurauia palawanensis	Actinidiaceae	Ericales	Angiosperm	Saurauia	palawanensis	Phi	Phi	Wal	Phi
Saurauia panayensis	Actinidiaceae	Ericales	Angiosperm	Saurauia	panayensis	Phi	Phi	Wal	Phi
Saurauia panduriformis	Actinidiaceae	Ericales	Angiosperm	Saurauia	panduriformis	Phi	Phi	Wal	Phi
Saurauia papillulosa	Actinidiaceae	Ericales	Angiosperm	Saurauia	papillulosa	Phi	Phi	Wal	Phi
Saurauia pendula	Actinidiaceae	Ericales	Angiosperm	Saurauia	pendula	Ind	Jav	Sun	Jav
Saurauia pendula	Actinidiaceae	Ericales	Angiosperm	Saurauia	pendula	Ind	Sum	Sun	Sum
Saurauia philippinensis	Actinidiaceae	Ericales	Angiosperm	Saurauia	philippinensis	Phi	Phi	Wal	Phi
Saurauia plurilocularis	Actinidiaceae	Ericales	Angiosperm	Saurauia	plurilocularis	Ind/PNG	NGu	Sah	NGu
Saurauia polyneura	Actinidiaceae	Ericales	Angiosperm	Saurauia	polyneura	Myn	MAs	Sun	MAs
Saurauia polysperma	Actinidiaceae	Ericales	Angiosperm	Saurauia	polysperma	Phi	Phi	Wal	Phi
Saurauia punduana	Actinidiaceae	Ericales	Angiosperm	Saurauia	punduana	Myn	MAs	Sun	MAs
Saurauia purgans	Actinidiaceae	Ericales	Angiosperm	Saurauia	purgans	Ind/PNG	NGu	Sah	NGu
Saurauia purgans	Actinidiaceae	Ericales	Angiosperm	Saurauia	purgans	PNG	NGu	Sah	NGu
Saurauia reinwardtiana	Actinidiaceae	Ericales	Angiosperm	Saurauia	reinwardtiana	Ind	Bor	Sun	Bor
Saurauia ridleyi	Actinidiaceae	Ericales	Angiosperm	Saurauia	ridleyi	Ind	Bor	Sun	Bor
Saurauia roxburghii	Actinidiaceae	Ericales	Angiosperm	Saurauia	roxburghii	Lao	Mas	Sun	Mas
Saurauia roxburghii	Actinidiaceae	Ericales	Angiosperm	Saurauia	roxburghii	Myn	MAs	Sun	MAs
Saurauia samarensis	Actinidiaceae	Ericales	Angiosperm	Saurauia	samarensis	Phi	Phi	Wal	Phi
Saurauia sampad	Actinidiaceae	Ericales	Angiosperm	Saurauia	sampad	Phi	Phi	Wal	Phi
Saurauia scaberrima	Actinidiaceae	Ericales	Angiosperm	Saurauia	scaberrima	Ind/PNG	NGu	Sah	NGu
Saurauia schmutzii	Actinidiaceae	Ericales	Angiosperm	Saurauia	schmutzii	Ind	LSI	Wal	LSI
Saurauia schumanniana	Actinidiaceae	Ericales	Angiosperm	Saurauia	schumanniana	PNG	NGu	Sah	NGu
Saurauia serrata	Actinidiaceae	Ericales	Angiosperm	Saurauia	serrata	Phi	Phi	Wal	Phi
Saurauia sibuyanensis	Actinidiaceae	Ericales	Angiosperm	Saurauia	sibuyanensis	Phi	Phi	Wal	Phi
Saurauia sorsogonensis	Actinidiaceae	Ericales	Angiosperm	Saurauia	sorsogonensis	Phi	Phi	Wal	Phi
Saurauia sparsiflora	Actinidiaceae	Ericales	Angiosperm	Saurauia	sparsiflora	Phi	Phi	Wal	Phi
Saurauia subspinosa	Actinidiaceae	Ericales	Angiosperm	Saurauia	subspinosa	Myn	MAs	Sun	MAs
Saurauia tayabensis	Actinidiaceae	Ericales	Angiosperm	Saurauia	tayabensis	Phi	Phi	Wal	Phi
Saurauia trichophora	Actinidiaceae	Ericales	Angiosperm	Saurauia	trichophora	Phi	Phi	Wal	Phi
Saurauia tristyla	Actinidiaceae	Ericales	Angiosperm	Saurauia	tristyla	Ind	Sum	Sun	Sum
Saurauia tristyla	Actinidiaceae	Ericales	Angiosperm	Saurauia	tristyla	Ind/Mly/Bru	Bor	Sun	Bor
Saurauia tristyla	Actinidiaceae	Ericales	Angiosperm	Saurauia	tristyla	Ind	Sul	Wal	Sul
Saurauia tristyla	Actinidiaceae	Ericales	Angiosperm	Saurauia	tristyla	Ind	Mlk	Wal	Mlk
Saurauia trunciflora	Actinidiaceae	Ericales	Angiosperm	Saurauia	trunciflora	Phi	Phi	Wal	Phi
Saurauia umbellata	Actinidiaceae	Ericales	Angiosperm	Saurauia	umbellata	Ind	Sum	Sun	Sum
Saurauia urdanetensis	Actinidiaceae	Ericales	Angiosperm	Saurauia	urdanetensis	Phi	Phi	Wal	Phi
Saurauia vanoverberghii	Actinidiaceae	Ericales	Angiosperm	Saurauia	vanoverberghii	Phi	Phi	Wal	Phi
Saurauia verheijenii	Actinidiaceae	Ericales	Angiosperm	Saurauia	verheijenii	Ind	LSI	Wal	LSI
Saurauia wenzelii	Actinidiaceae	Ericales	Angiosperm	Saurauia	wenzelii	Phi	Phi	Wal	Phi
Saurauia whitfordii	Actinidiaceae	Ericales	Angiosperm	Saurauia	whitfordii	Phi	Phi	Wal	Phi
Scapha elegans	Actinidiaceae	Ericales	Angiosperm	Scapha	elegans	Phi	Phi	Wal	Phi
Sambucus australasica	Adoxaceae	Dipsacales	Angiosperm	Sambucus	australasica	Aus	Aus	Sah	AU Atherton Plateau
Sambucus australasica	Adoxaceae	Dipsacales	Angiosperm	Sambucus	australasica	Aus	Aus	Sah	AU Cape York Peninsula
Sambucus australasica	Adoxaceae	Dipsacales	Angiosperm	Sambucus	australasica	Aus	Aus	Sah	AU Eastern Desert
Sambucus australasica	Adoxaceae	Dipsacales	Angiosperm	Sambucus	australasica	Aus	Aus	Sah	AU Eastern Queensland
Sambucus australasica	Adoxaceae	Dipsacales	Angiosperm	Sambucus	australasica	Aus	Aus	Sah	AU Southeastern
Sambucus australasica	Adoxaceae	Dipsacales	Angiosperm	Sambucus	australasica	Aus	Aus	Sah	AU Victoria
Sambucus canadensis	Adoxaceae	Dipsacales	Angiosperm	Sambucus	canadensis	Ind/PNG	NGu	Sah	NGu
Sambucus canadensis	Adoxaceae	Dipsacales	Angiosperm	Sambucus	canadensis	Lao	MAs	Sun	MAs
Sambucus canadensis	Adoxaceae	Dipsacales	Angiosperm	Sambucus	canadensis	Tha	MAs	Sun	MAs
Sambucus canadensis	Adoxaceae	Dipsacales	Angiosperm	Sambucus	canadensis	Phi	Phi	Wal	Phi
Sambucus eberhardtii	Adoxaceae	Dipsacales	Angiosperm	Sambucus	eberhardtii	Lao	Mas	Sun	Mas
Sambucus gaudichaudiana	Adoxaceae	Dipsacales	Angiosperm	Sambucus	gaudichaudiana	Aus	Aus	Sah	AU Adelaide
Sambucus gaudichaudiana	Adoxaceae	Dipsacales	Angiosperm	Sambucus	gaudichaudiana	Aus	Aus	Sah	AU Eastern Desert
Sambucus gaudichaudiana	Adoxaceae	Dipsacales	Angiosperm	Sambucus	gaudichaudiana	Aus	Aus	Sah	AU Eastern Queensland
Sambucus gaudichaudiana	Adoxaceae	Dipsacales	Angiosperm	Sambucus	gaudichaudiana	Aus	Aus	Sah	AU Southeastern
Sambucus gaudichaudiana	Adoxaceae	Dipsacales	Angiosperm	Sambucus	gaudichaudiana	Aus	Aus	Sah	AU Tasmania
Sambucus gaudichaudiana	Adoxaceae	Dipsacales	Angiosperm	Sambucus	gaudichaudiana	Aus	Aus	Sah	AU Victoria
Sambucus javanica	Adoxaceae	Dipsacales	Angiosperm	Sambucus	javanica	Ind/PNG	NGu	Sah	NGu
Sambucus javanica	Adoxaceae	Dipsacales	Angiosperm	Sambucus	javanica	Ind	Jav	Sun	Jav
Sambucus javanica	Adoxaceae	Dipsacales	Angiosperm	Sambucus	javanica	Ind	Sum	Sun	Sum
Sambucus javanica	Adoxaceae	Dipsacales	Angiosperm	Sambucus	javanica	Ind/Mly/Bru	Bor	Sun	Bor
Sambucus javanica	Adoxaceae	Dipsacales	Angiosperm	Sambucus	javanica	Lao	MAs	Sun	MAs
Sambucus javanica	Adoxaceae	Dipsacales	Angiosperm	Sambucus	javanica	Mly	Bor	Sun	Bor
Sambucus javanica	Adoxaceae	Dipsacales	Angiosperm	Sambucus	javanica	Myn	MAs	Sun	MAs
Sambucus javanica	Adoxaceae	Dipsacales	Angiosperm	Sambucus	javanica	Ind	Sul	Wal	Sul
Sambucus javanica	Adoxaceae	Dipsacales	Angiosperm	Sambucus	javanica	Phi	Phi	Wal	Phi
Viburnum albopedunculatum	Adoxaceae	Dipsacales	Angiosperm	Viburnum	albopedunculatum	Ind/PNG	NGu	Sah	NGu
Viburnum amplificatum	Adoxaceae	Dipsacales	Angiosperm	Viburnum	amplificatum	Mly	Bor	Sun	Bor
Viburnum atrocyaneum	Adoxaceae	Dipsacales	Angiosperm	Viburnum	atrocyaneum	Myn	MAs	Sun	MAs
Viburnum beccarii	Adoxaceae	Dipsacales	Angiosperm	Viburnum	beccarii	Mly	Bor	Sun	Bor
Viburnum clemensae	Adoxaceae	Dipsacales	Angiosperm	Viburnum	clemensae	Mly	Bor	Sun	Bor
Viburnum cylindricum	Adoxaceae	Dipsacales	Angiosperm	Viburnum	cylindricum	Ind	Jav	Sun	Jav
Viburnum cylindricum	Adoxaceae	Dipsacales	Angiosperm	Viburnum	cylindricum	Ind	Sum	Sun	Sum
Viburnum cylindricum	Adoxaceae	Dipsacales	Angiosperm	Viburnum	cylindricum	Myn	MAs	Sun	MAs
Viburnum cylindricum	Adoxaceae	Dipsacales	Angiosperm	Viburnum	cylindricum	Tha	MAs	Sun	MAs
Viburnum cylindricum	Adoxaceae	Dipsacales	Angiosperm	Viburnum	cylindricum	Ind	Sul	Wal	Sul
Viburnum erubescens	Adoxaceae	Dipsacales	Angiosperm	Viburnum	erubescens	Myn	MAs	Sun	MAs
Viburnum foetidum	Adoxaceae	Dipsacales	Angiosperm	Viburnum	foetidum	Lao	MAs	Sun	MAs
Viburnum foetidum	Adoxaceae	Dipsacales	Angiosperm	Viburnum	foetidum	Myn	MAs	Sun	MAs
Viburnum foetidum	Adoxaceae	Dipsacales	Angiosperm	Viburnum	foetidum	Tha	MAs	Sun	MAs
Viburnum glaberrimum	Adoxaceae	Dipsacales	Angiosperm	Viburnum	glaberrimum	Phi	Phi	Wal	Phi
Viburnum hispidulum	Adoxaceae	Dipsacales	Angiosperm	Viburnum	hispidulum	Ind	Bor	Sun	Bor
Viburnum hispidulum	Adoxaceae	Dipsacales	Angiosperm	Viburnum	hispidulum	Mly	Bor	Sun	Bor
Viburnum inopinatum	Adoxaceae	Dipsacales	Angiosperm	Viburnum	inopinatum	Lao	MAs	Sun	MAs
Viburnum lutescens	Adoxaceae	Dipsacales	Angiosperm	Viburnum	lutescens	Ind	Jav	Sun	Jav
Viburnum lutescens	Adoxaceae	Dipsacales	Angiosperm	Viburnum	lutescens	Ind	Sum	Sun	Sum
Viburnum lutescens	Adoxaceae	Dipsacales	Angiosperm	Viburnum	lutescens	Ind/Mly/Bru	Bor	Sun	Bor
Viburnum lutescens	Adoxaceae	Dipsacales	Angiosperm	Viburnum	lutescens	Mly	MAs	Sun	MAs
Viburnum lutescens	Adoxaceae	Dipsacales	Angiosperm	Viburnum	lutescens	Mly	Bor	Sun	Bor
Viburnum lutescens	Adoxaceae	Dipsacales	Angiosperm	Viburnum	lutescens	Myn	MAs	Sun	MAs
Viburnum lutescens	Adoxaceae	Dipsacales	Angiosperm	Viburnum	lutescens	Ind	Sul	Wal	Sul
Viburnum luzonicum	Adoxaceae	Dipsacales	Angiosperm	Viburnum	luzonicum	Phi	Phi	Wal	Phi
Viburnum nervosum	Adoxaceae	Dipsacales	Angiosperm	Viburnum	nervosum	Myn	MAs	Sun	MAs
Viburnum odoratissimum	Adoxaceae	Dipsacales	Angiosperm	Viburnum	odoratissimum	Lao	MAs	Sun	MAs
Viburnum odoratissimum	Adoxaceae	Dipsacales	Angiosperm	Viburnum	odoratissimum	Myn	MAs	Sun	MAs
Viburnum odoratissimum	Adoxaceae	Dipsacales	Angiosperm	Viburnum	odoratissimum	Tha	MAs	Sun	MAs
Viburnum odoratissimum	Adoxaceae	Dipsacales	Angiosperm	Viburnum	odoratissimum	Phi	Phi	Wal	Phi
Viburnum propinquum	Adoxaceae	Dipsacales	Angiosperm	Viburnum	propinquum	Phi	Phi	Wal	Phi
Viburnum punctatum	Adoxaceae	Dipsacales	Angiosperm	Viburnum	punctatum	Cam	MAs	Sun	MAs
Viburnum punctatum	Adoxaceae	Dipsacales	Angiosperm	Viburnum	punctatum	Lao	MAs	Sun	MAs
Viburnum sambucinum	Adoxaceae	Dipsacales	Angiosperm	Viburnum	sambucinum	Ind	Bor	Sun	Bor
Viburnum sambucinum	Adoxaceae	Dipsacales	Angiosperm	Viburnum	sambucinum	Ind	Jav	Sun	Jav
Viburnum sambucinum	Adoxaceae	Dipsacales	Angiosperm	Viburnum	sambucinum	Sin	MAs	Sun	MAs
Viburnum sambucinum	Adoxaceae	Dipsacales	Angiosperm	Viburnum	sambucinum	Mly	Bor	Sun	Bor
Viburnum sambucinum	Adoxaceae	Dipsacales	Angiosperm	Viburnum	sambucinum	Ind	Sul	Wal	Sul
Viburnum setigerum	Adoxaceae	Dipsacales	Angiosperm	Viburnum	setigerum	Myn	MAs	Sun	MAs
Viburnum shweliense	Adoxaceae	Dipsacales	Angiosperm	Viburnum	shweliense	Myn	MAs	Sun	MAs
Viburnum tengyuehense	Adoxaceae	Dipsacales	Angiosperm	Viburnum	tengyuehense	Myn	MAs	Sun	MAs
Viburnum vernicosum	Adoxaceae	Dipsacales	Angiosperm	Viburnum	vernicosum	Mly	Bor	Sun	Bor
Viburnum wardii	Adoxaceae	Dipsacales	Angiosperm	Viburnum	wardii	Myn	MAs	Sun	MAs
Carpobrotus edulis	Aizoaceae	Caryophyllales	Angiosperm	Carpobrotus	edulis	Sin	MAs	Sun	MAs
Carpobrotus glaucescens	Aizoaceae	Caryophyllales	Angiosperm	Carpobrotus	glaucescens	Aus	Aus	Sah	AU Eastern Queensland
Carpobrotus glaucescens	Aizoaceae	Caryophyllales	Angiosperm	Carpobrotus	glaucescens	Aus	Aus	Sah	AU External Territories
Carpobrotus glaucescens	Aizoaceae	Caryophyllales	Angiosperm	Carpobrotus	glaucescens	Aus	Aus	Sah	AU Southeastern
Carpobrotus glaucescens	Aizoaceae	Caryophyllales	Angiosperm	Carpobrotus	glaucescens	Aus	Aus	Sah	AU Victoria
Carpobrotus modestus	Aizoaceae	Caryophyllales	Angiosperm	Carpobrotus	modestus	Aus	Aus	Sah	AU Adelaide
Carpobrotus modestus	Aizoaceae	Caryophyllales	Angiosperm	Carpobrotus	modestus	Aus	Aus	Sah	AU Eastern Desert
Carpobrotus modestus	Aizoaceae	Caryophyllales	Angiosperm	Carpobrotus	modestus	Aus	Aus	Sah	AU Eyre Peninsula
Carpobrotus modestus	Aizoaceae	Caryophyllales	Angiosperm	Carpobrotus	modestus	Aus	Aus	Sah	AU Hampton
Carpobrotus modestus	Aizoaceae	Caryophyllales	Angiosperm	Carpobrotus	modestus	Aus	Aus	Sah	AU Southeastern
Carpobrotus modestus	Aizoaceae	Caryophyllales	Angiosperm	Carpobrotus	modestus	Aus	Aus	Sah	AU Southwest Interzone
Carpobrotus modestus	Aizoaceae	Caryophyllales	Angiosperm	Carpobrotus	modestus	Aus	Aus	Sah	AU Southwestern
Carpobrotus modestus	Aizoaceae	Caryophyllales	Angiosperm	Carpobrotus	modestus	Aus	Aus	Sah	AU Victoria
Carpobrotus rossii	Aizoaceae	Caryophyllales	Angiosperm	Carpobrotus	rossii	Aus	Aus	Sah	AU Adelaide
Carpobrotus rossii	Aizoaceae	Caryophyllales	Angiosperm	Carpobrotus	rossii	Aus	Aus	Sah	AU Eastern Desert
Carpobrotus rossii	Aizoaceae	Caryophyllales	Angiosperm	Carpobrotus	rossii	Aus	Aus	Sah	AU Eyre Peninsula
Carpobrotus rossii	Aizoaceae	Caryophyllales	Angiosperm	Carpobrotus	rossii	Aus	Aus	Sah	AU Hampton
Carpobrotus rossii	Aizoaceae	Caryophyllales	Angiosperm	Carpobrotus	rossii	Aus	Aus	Sah	AU Nullarbor
Carpobrotus rossii	Aizoaceae	Caryophyllales	Angiosperm	Carpobrotus	rossii	Aus	Aus	Sah	AU Southwest Interzone
Carpobrotus rossii	Aizoaceae	Caryophyllales	Angiosperm	Carpobrotus	rossii	Aus	Aus	Sah	AU Southwestern
Carpobrotus rossii	Aizoaceae	Caryophyllales	Angiosperm	Carpobrotus	rossii	Aus	Aus	Sah	AU Tasmania
Carpobrotus rossii	Aizoaceae	Caryophyllales	Angiosperm	Carpobrotus	rossii	Aus	Aus	Sah	AU Victoria
Carpobrotus rossii	Aizoaceae	Caryophyllales	Angiosperm	Carpobrotus	rossii	Aus	Aus	Sah	AU Western Desert
Carpobrotus virescens	Aizoaceae	Caryophyllales	Angiosperm	Carpobrotus	virescens	Aus	Aus	Sah	AU Hampton
Carpobrotus virescens	Aizoaceae	Caryophyllales	Angiosperm	Carpobrotus	virescens	Aus	Aus	Sah	AU Southwest Interzone
Carpobrotus virescens	Aizoaceae	Caryophyllales	Angiosperm	Carpobrotus	virescens	Aus	Aus	Sah	AU Southwestern
Carpobrotus virescens	Aizoaceae	Caryophyllales	Angiosperm	Carpobrotus	virescens	Aus	Aus	Sah	AU Western Desert
Disphyma crassifolium	Aizoaceae	Caryophyllales	Angiosperm	Disphyma	crassifolium	Aus	Aus	Sah	AU Adelaide
Disphyma crassifolium	Aizoaceae	Caryophyllales	Angiosperm	Disphyma	crassifolium	Aus	Aus	Sah	AU Eastern Desert
Disphyma crassifolium	Aizoaceae	Caryophyllales	Angiosperm	Disphyma	crassifolium	Aus	Aus	Sah	AU Eyre Peninsula
Disphyma crassifolium	Aizoaceae	Caryophyllales	Angiosperm	Disphyma	crassifolium	Aus	Aus	Sah	AU Hampton
Disphyma crassifolium	Aizoaceae	Caryophyllales	Angiosperm	Disphyma	crassifolium	Aus	Aus	Sah	AU Nullarbor
Disphyma crassifolium	Aizoaceae	Caryophyllales	Angiosperm	Disphyma	crassifolium	Aus	Aus	Sah	AU Southeastern
Disphyma crassifolium	Aizoaceae	Caryophyllales	Angiosperm	Disphyma	crassifolium	Aus	Aus	Sah	AU Southwest Interzone
Disphyma crassifolium	Aizoaceae	Caryophyllales	Angiosperm	Disphyma	crassifolium	Aus	Aus	Sah	AU Southwestern
Disphyma crassifolium	Aizoaceae	Caryophyllales	Angiosperm	Disphyma	crassifolium	Aus	Aus	Sah	AU Tasmania
Disphyma crassifolium	Aizoaceae	Caryophyllales	Angiosperm	Disphyma	crassifolium	Aus	Aus	Sah	AU Victoria
Disphyma crassifolium	Aizoaceae	Caryophyllales	Angiosperm	Disphyma	crassifolium	Aus	Aus	Sah	AU Western Desert
Gunniopsis calcarea	Aizoaceae	Caryophyllales	Angiosperm	Gunniopsis	calcarea	Aus	Aus	Sah	AU Eastern Desert
Gunniopsis calcarea	Aizoaceae	Caryophyllales	Angiosperm	Gunniopsis	calcarea	Aus	Aus	Sah	AU Hampton
Gunniopsis calcarea	Aizoaceae	Caryophyllales	Angiosperm	Gunniopsis	calcarea	Aus	Aus	Sah	AU Nullarbor
Gunniopsis calcarea	Aizoaceae	Caryophyllales	Angiosperm	Gunniopsis	calcarea	Aus	Aus	Sah	AU Southwest Interzone
Gunniopsis calcarea	Aizoaceae	Caryophyllales	Angiosperm	Gunniopsis	calcarea	Aus	Aus	Sah	AU Western Desert
Gunniopsis calva	Aizoaceae	Caryophyllales	Angiosperm	Gunniopsis	calva	Aus	Aus	Sah	AU Eastern Desert
Gunniopsis calva	Aizoaceae	Caryophyllales	Angiosperm	Gunniopsis	calva	Aus	Aus	Sah	AU Eyre Peninsula
Gunniopsis divisa	Aizoaceae	Caryophyllales	Angiosperm	Gunniopsis	divisa	Aus	Aus	Sah	AU Southwest Interzone
Gunniopsis divisa	Aizoaceae	Caryophyllales	Angiosperm	Gunniopsis	divisa	Aus	Aus	Sah	AU Western Desert
Gunniopsis glabra	Aizoaceae	Caryophyllales	Angiosperm	Gunniopsis	glabra	Aus	Aus	Sah	AU Southwest Interzone
Gunniopsis glabra	Aizoaceae	Caryophyllales	Angiosperm	Gunniopsis	glabra	Aus	Aus	Sah	AU Southwestern
Gunniopsis glabra	Aizoaceae	Caryophyllales	Angiosperm	Gunniopsis	glabra	Aus	Aus	Sah	AU Western Desert
Gunniopsis intermedia	Aizoaceae	Caryophyllales	Angiosperm	Gunniopsis	intermedia	Aus	Aus	Sah	AU Southwest Interzone
Gunniopsis intermedia	Aizoaceae	Caryophyllales	Angiosperm	Gunniopsis	intermedia	Aus	Aus	Sah	AU Southwestern
Gunniopsis intermedia	Aizoaceae	Caryophyllales	Angiosperm	Gunniopsis	intermedia	Aus	Aus	Sah	AU Western Desert
Gunniopsis kochii	Aizoaceae	Caryophyllales	Angiosperm	Gunniopsis	kochii	Aus	Aus	Sah	AU Eastern Desert
Gunniopsis papillata	Aizoaceae	Caryophyllales	Angiosperm	Gunniopsis	papillata	Aus	Aus	Sah	AU Eastern Desert
Gunniopsis papillata	Aizoaceae	Caryophyllales	Angiosperm	Gunniopsis	papillata	Aus	Aus	Sah	AU Eyre Peninsula
Gunniopsis propinqua	Aizoaceae	Caryophyllales	Angiosperm	Gunniopsis	propinqua	Aus	Aus	Sah	AU Western Desert
Gunniopsis quadrifida	Aizoaceae	Caryophyllales	Angiosperm	Gunniopsis	quadrifida	Aus	Aus	Sah	AU Eastern Desert
Gunniopsis quadrifida	Aizoaceae	Caryophyllales	Angiosperm	Gunniopsis	quadrifida	Aus	Aus	Sah	AU Eyre Peninsula
Gunniopsis quadrifida	Aizoaceae	Caryophyllales	Angiosperm	Gunniopsis	quadrifida	Aus	Aus	Sah	AU Nullarbor
Gunniopsis quadrifida	Aizoaceae	Caryophyllales	Angiosperm	Gunniopsis	quadrifida	Aus	Aus	Sah	AU Southwest Interzone
Gunniopsis quadrifida	Aizoaceae	Caryophyllales	Angiosperm	Gunniopsis	quadrifida	Aus	Aus	Sah	AU Southwestern
Gunniopsis quadrifida	Aizoaceae	Caryophyllales	Angiosperm	Gunniopsis	quadrifida	Aus	Aus	Sah	AU Western Desert
Gunniopsis rodwayi	Aizoaceae	Caryophyllales	Angiosperm	Gunniopsis	rodwayi	Aus	Aus	Sah	AU Southwest Interzone
Gunniopsis rodwayi	Aizoaceae	Caryophyllales	Angiosperm	Gunniopsis	rodwayi	Aus	Aus	Sah	AU Southwestern
Gunniopsis rodwayi	Aizoaceae	Caryophyllales	Angiosperm	Gunniopsis	rodwayi	Aus	Aus	Sah	AU Western Desert
Gunniopsis rubra	Aizoaceae	Caryophyllales	Angiosperm	Gunniopsis	rubra	Aus	Aus	Sah	AU Southwest Interzone
Gunniopsis rubra	Aizoaceae	Caryophyllales	Angiosperm	Gunniopsis	rubra	Aus	Aus	Sah	AU Southwestern
Gunniopsis rubra	Aizoaceae	Caryophyllales	Angiosperm	Gunniopsis	rubra	Aus	Aus	Sah	AU Western Desert
Gunniopsis septifraga	Aizoaceae	Caryophyllales	Angiosperm	Gunniopsis	septifraga	Aus	Aus	Sah	AU Adelaide
Gunniopsis septifraga	Aizoaceae	Caryophyllales	Angiosperm	Gunniopsis	septifraga	Aus	Aus	Sah	AU Eastern Desert
Gunniopsis septifraga	Aizoaceae	Caryophyllales	Angiosperm	Gunniopsis	septifraga	Aus	Aus	Sah	AU Eyre Peninsula
Gunniopsis septifraga	Aizoaceae	Caryophyllales	Angiosperm	Gunniopsis	septifraga	Aus	Aus	Sah	AU Nullarbor
Gunniopsis septifraga	Aizoaceae	Caryophyllales	Angiosperm	Gunniopsis	septifraga	Aus	Aus	Sah	AU Southwest Interzone
Gunniopsis septifraga	Aizoaceae	Caryophyllales	Angiosperm	Gunniopsis	septifraga	Aus	Aus	Sah	AU Southwestern
Gunniopsis septifraga	Aizoaceae	Caryophyllales	Angiosperm	Gunniopsis	septifraga	Aus	Aus	Sah	AU Western Desert
Gunniopsis tenuifolia	Aizoaceae	Caryophyllales	Angiosperm	Gunniopsis	tenuifolia	Aus	Aus	Sah	AU Eastern Desert
Gunniopsis zygophylloides	Aizoaceae	Caryophyllales	Angiosperm	Gunniopsis	zygophylloides	Aus	Aus	Sah	AU Central Queensland
Gunniopsis zygophylloides	Aizoaceae	Caryophyllales	Angiosperm	Gunniopsis	zygophylloides	Aus	Aus	Sah	AU Eastern Desert
Lampranthus tenuifolius	Aizoaceae	Caryophyllales	Angiosperm	Lampranthus	tenuifolius	Ind	Sum	Sun	Sum
Lampranthus tenuifolius	Aizoaceae	Caryophyllales	Angiosperm	Lampranthus	tenuifolius	Ind/Mly/Bru	Bor	Sun	Bor
Mesembryanthemum cordifolium	Aizoaceae	Caryophyllales	Angiosperm	Mesembryanthemum	cordifolium	Sin	MAs	Sun	MAs
Sarcozona bicarinata	Aizoaceae	Caryophyllales	Angiosperm	Sarcozona	bicarinata	Aus	Aus	Sah	AU Adelaide
Sarcozona bicarinata	Aizoaceae	Caryophyllales	Angiosperm	Sarcozona	bicarinata	Aus	Aus	Sah	AU Eyre Peninsula
Sarcozona bicarinata	Aizoaceae	Caryophyllales	Angiosperm	Sarcozona	bicarinata	Aus	Aus	Sah	AU Nullarbor
Sarcozona praecox	Aizoaceae	Caryophyllales	Angiosperm	Sarcozona	praecox	Aus	Aus	Sah	AU Adelaide
Sarcozona praecox	Aizoaceae	Caryophyllales	Angiosperm	Sarcozona	praecox	Aus	Aus	Sah	AU Eastern Desert
Sarcozona praecox	Aizoaceae	Caryophyllales	Angiosperm	Sarcozona	praecox	Aus	Aus	Sah	AU Eyre Peninsula
Sarcozona praecox	Aizoaceae	Caryophyllales	Angiosperm	Sarcozona	praecox	Aus	Aus	Sah	AU Hampton
Sarcozona praecox	Aizoaceae	Caryophyllales	Angiosperm	Sarcozona	praecox	Aus	Aus	Sah	AU Nullarbor
Sarcozona praecox	Aizoaceae	Caryophyllales	Angiosperm	Sarcozona	praecox	Aus	Aus	Sah	AU Southwest Interzone
Sarcozona praecox	Aizoaceae	Caryophyllales	Angiosperm	Sarcozona	praecox	Aus	Aus	Sah	AU Southwestern
Sarcozona praecox	Aizoaceae	Caryophyllales	Angiosperm	Sarcozona	praecox	Aus	Aus	Sah	AU Victoria
Sarcozona praecox	Aizoaceae	Caryophyllales	Angiosperm	Sarcozona	praecox	Aus	Aus	Sah	AU Western Desert
Sesuvium portulacastrum	Aizoaceae	Caryophyllales	Angiosperm	Sesuvium	portulacastrum	Aus	Aus	Sah	AU Arnhem Land
Sesuvium portulacastrum	Aizoaceae	Caryophyllales	Angiosperm	Sesuvium	portulacastrum	Aus	Aus	Sah	AU Atherton Plateau
Sesuvium portulacastrum	Aizoaceae	Caryophyllales	Angiosperm	Sesuvium	portulacastrum	Aus	Aus	Sah	AU Cape York Peninsula
Sesuvium portulacastrum	Aizoaceae	Caryophyllales	Angiosperm	Sesuvium	portulacastrum	Aus	Aus	Sah	AU Central Queensland
Sesuvium portulacastrum	Aizoaceae	Caryophyllales	Angiosperm	Sesuvium	portulacastrum	Aus	Aus	Sah	AU Eastern Queensland
Sesuvium portulacastrum	Aizoaceae	Caryophyllales	Angiosperm	Sesuvium	portulacastrum	Aus	Aus	Sah	AU External Territories
Sesuvium portulacastrum	Aizoaceae	Caryophyllales	Angiosperm	Sesuvium	portulacastrum	Aus	Aus	Sah	AU Great Sandy Desert Interzone
Sesuvium portulacastrum	Aizoaceae	Caryophyllales	Angiosperm	Sesuvium	portulacastrum	Aus	Aus	Sah	AU Kimberley Plateau
Sesuvium portulacastrum	Aizoaceae	Caryophyllales	Angiosperm	Sesuvium	portulacastrum	Aus	Aus	Sah	AU Southeastern
Sesuvium portulacastrum	Aizoaceae	Caryophyllales	Angiosperm	Sesuvium	portulacastrum	Aus	Aus	Sah	AU Western Desert
Sesuvium portulacastrum	Aizoaceae	Caryophyllales	Angiosperm	Sesuvium	portulacastrum	Ind/PNG	NGu	Sah	NGu
Sesuvium portulacastrum	Aizoaceae	Caryophyllales	Angiosperm	Sesuvium	portulacastrum	Ind	Jav	Sun	Jav
Sesuvium portulacastrum	Aizoaceae	Caryophyllales	Angiosperm	Sesuvium	portulacastrum	Ind/Mly/Bru	Bor	Sun	Bor
Sesuvium portulacastrum	Aizoaceae	Caryophyllales	Angiosperm	Sesuvium	portulacastrum	Mly	MAs	Sun	MAs
Sesuvium portulacastrum	Aizoaceae	Caryophyllales	Angiosperm	Sesuvium	portulacastrum	Myn	MAs	Sun	MAs
Sesuvium portulacastrum	Aizoaceae	Caryophyllales	Angiosperm	Sesuvium	portulacastrum	Sin	MAs	Sun	MAs
Sesuvium portulacastrum	Aizoaceae	Caryophyllales	Angiosperm	Sesuvium	portulacastrum	Ind	Mlk	Wal	Mlk
Sesuvium portulacastrum	Aizoaceae	Caryophyllales	Angiosperm	Sesuvium	portulacastrum	Ind/Tim	LSI	Wal	LSI
Sesuvium portulacastrum	Aizoaceae	Caryophyllales	Angiosperm	Sesuvium	portulacastrum	Phi	Phi	Wal	Phi
Tetragonia coronata	Aizoaceae	Caryophyllales	Angiosperm	Tetragonia	coronata	Aus	Aus	Sah	AU Kimberley Plateau
Tetragonia coronata	Aizoaceae	Caryophyllales	Angiosperm	Tetragonia	coronata	Aus	Aus	Sah	AU Western Desert
Tetragonia cristata	Aizoaceae	Caryophyllales	Angiosperm	Tetragonia	cristata	Aus	Aus	Sah	AU Western Desert
Tetragonia diptera	Aizoaceae	Caryophyllales	Angiosperm	Tetragonia	diptera	Aus	Aus	Sah	AU Southwest Interzone
Tetragonia diptera	Aizoaceae	Caryophyllales	Angiosperm	Tetragonia	diptera	Aus	Aus	Sah	AU Southwestern
Tetragonia diptera	Aizoaceae	Caryophyllales	Angiosperm	Tetragonia	diptera	Aus	Aus	Sah	AU Western Desert
Tetragonia eremaea	Aizoaceae	Caryophyllales	Angiosperm	Tetragonia	eremaea	Aus	Aus	Sah	AU Adelaide
Tetragonia eremaea	Aizoaceae	Caryophyllales	Angiosperm	Tetragonia	eremaea	Aus	Aus	Sah	AU Eastern Desert
Tetragonia eremaea	Aizoaceae	Caryophyllales	Angiosperm	Tetragonia	eremaea	Aus	Aus	Sah	AU Eyre Peninsula
Tetragonia eremaea	Aizoaceae	Caryophyllales	Angiosperm	Tetragonia	eremaea	Aus	Aus	Sah	AU Hampton
Tetragonia eremaea	Aizoaceae	Caryophyllales	Angiosperm	Tetragonia	eremaea	Aus	Aus	Sah	AU Nullarbor
Tetragonia eremaea	Aizoaceae	Caryophyllales	Angiosperm	Tetragonia	eremaea	Aus	Aus	Sah	AU Southwest Interzone
Tetragonia eremaea	Aizoaceae	Caryophyllales	Angiosperm	Tetragonia	eremaea	Aus	Aus	Sah	AU Western Desert
Tetragonia implexicoma	Aizoaceae	Caryophyllales	Angiosperm	Tetragonia	implexicoma	Aus	Aus	Sah	AU Adelaide
Tetragonia implexicoma	Aizoaceae	Caryophyllales	Angiosperm	Tetragonia	implexicoma	Aus	Aus	Sah	AU External Territories
Tetragonia implexicoma	Aizoaceae	Caryophyllales	Angiosperm	Tetragonia	implexicoma	Aus	Aus	Sah	AU Eyre Peninsula
Tetragonia implexicoma	Aizoaceae	Caryophyllales	Angiosperm	Tetragonia	implexicoma	Aus	Aus	Sah	AU Hampton
Tetragonia implexicoma	Aizoaceae	Caryophyllales	Angiosperm	Tetragonia	implexicoma	Aus	Aus	Sah	AU Nullarbor
Tetragonia implexicoma	Aizoaceae	Caryophyllales	Angiosperm	Tetragonia	implexicoma	Aus	Aus	Sah	AU Southwest Interzone
Tetragonia implexicoma	Aizoaceae	Caryophyllales	Angiosperm	Tetragonia	implexicoma	Aus	Aus	Sah	AU Southwestern
Tetragonia implexicoma	Aizoaceae	Caryophyllales	Angiosperm	Tetragonia	implexicoma	Aus	Aus	Sah	AU Tasmania
Tetragonia implexicoma	Aizoaceae	Caryophyllales	Angiosperm	Tetragonia	implexicoma	Aus	Aus	Sah	AU Victoria
Tetragonia moorei	Aizoaceae	Caryophyllales	Angiosperm	Tetragonia	moorei	Aus	Aus	Sah	AU Adelaide
Tetragonia moorei	Aizoaceae	Caryophyllales	Angiosperm	Tetragonia	moorei	Aus	Aus	Sah	AU Eastern Desert
Tetragonia moorei	Aizoaceae	Caryophyllales	Angiosperm	Tetragonia	moorei	Aus	Aus	Sah	AU Eyre Peninsula
Tetragonia moorei	Aizoaceae	Caryophyllales	Angiosperm	Tetragonia	moorei	Aus	Aus	Sah	AU Southwest Interzone
Tetragonia moorei	Aizoaceae	Caryophyllales	Angiosperm	Tetragonia	moorei	Aus	Aus	Sah	AU Western Desert
Tetragonia tetragonioides	Aizoaceae	Caryophyllales	Angiosperm	Tetragonia	tetragonioides	Myn	MAs	Sun	MAs
Tetragonia tetragonoides	Aizoaceae	Caryophyllales	Angiosperm	Tetragonia	tetragonoides	Aus	Aus	Sah	AU Adelaide
Tetragonia tetragonoides	Aizoaceae	Caryophyllales	Angiosperm	Tetragonia	tetragonoides	Aus	Aus	Sah	AU Central Queensland
Tetragonia tetragonoides	Aizoaceae	Caryophyllales	Angiosperm	Tetragonia	tetragonoides	Aus	Aus	Sah	AU Eastern Desert
Tetragonia tetragonoides	Aizoaceae	Caryophyllales	Angiosperm	Tetragonia	tetragonoides	Aus	Aus	Sah	AU Eastern Queensland
Tetragonia tetragonoides	Aizoaceae	Caryophyllales	Angiosperm	Tetragonia	tetragonoides	Aus	Aus	Sah	AU External Territories
Tetragonia tetragonoides	Aizoaceae	Caryophyllales	Angiosperm	Tetragonia	tetragonoides	Aus	Aus	Sah	AU Eyre Peninsula
Tetragonia tetragonoides	Aizoaceae	Caryophyllales	Angiosperm	Tetragonia	tetragonoides	Aus	Aus	Sah	AU Southeastern
Tetragonia tetragonoides	Aizoaceae	Caryophyllales	Angiosperm	Tetragonia	tetragonoides	Aus	Aus	Sah	AU Southwestern
Tetragonia tetragonoides	Aizoaceae	Caryophyllales	Angiosperm	Tetragonia	tetragonoides	Aus	Aus	Sah	AU Tasmania
Tetragonia tetragonoides	Aizoaceae	Caryophyllales	Angiosperm	Tetragonia	tetragonoides	Aus	Aus	Sah	AU Victoria
Trianthema compactum	Aizoaceae	Caryophyllales	Angiosperm	Trianthema	compactum	Aus	Aus	Sah	AU Arnhem Land
Trianthema compactum	Aizoaceae	Caryophyllales	Angiosperm	Trianthema	compactum	Aus	Aus	Sah	AU Cape York Peninsula
Trianthema compactum	Aizoaceae	Caryophyllales	Angiosperm	Trianthema	compactum	Aus	Aus	Sah	AU Eastern Queensland
Trianthema crystallina	Aizoaceae	Caryophyllales	Angiosperm	Trianthema	crystallina	Myn	MAs	Sun	MAs
Trianthema cusackianum	Aizoaceae	Caryophyllales	Angiosperm	Trianthema	cusackianum	Aus	Aus	Sah	AU Great Sandy Desert Interzone
Trianthema cusackianum	Aizoaceae	Caryophyllales	Angiosperm	Trianthema	cusackianum	Aus	Aus	Sah	AU Western Desert
Trianthema cypseleoides	Aizoaceae	Caryophyllales	Angiosperm	Trianthema	cypseleoides	Aus	Aus	Sah	AU Unclassified
Trianthema glossostigmum	Aizoaceae	Caryophyllales	Angiosperm	Trianthema	glossostigmum	Aus	Aus	Sah	AU Central Desert
Trianthema glossostigmum	Aizoaceae	Caryophyllales	Angiosperm	Trianthema	glossostigmum	Aus	Aus	Sah	AU Eastern Desert
Trianthema glossostigmum	Aizoaceae	Caryophyllales	Angiosperm	Trianthema	glossostigmum	Aus	Aus	Sah	AU Great Sandy Desert Interzone
Trianthema glossostigmum	Aizoaceae	Caryophyllales	Angiosperm	Trianthema	glossostigmum	Aus	Aus	Sah	AU Western Desert
Trianthema kimberleyi	Aizoaceae	Caryophyllales	Angiosperm	Trianthema	kimberleyi	Aus	Aus	Sah	AU Central Desert
Trianthema megaspermum	Aizoaceae	Caryophyllales	Angiosperm	Trianthema	megaspermum	Aus	Aus	Sah	AU Arnhem Land
Trianthema oxycalyptrum	Aizoaceae	Caryophyllales	Angiosperm	Trianthema	oxycalyptrum	Aus	Aus	Sah	AU Central Desert
Trianthema oxycalyptrum	Aizoaceae	Caryophyllales	Angiosperm	Trianthema	oxycalyptrum	Aus	Aus	Sah	AU Great Sandy Desert Interzone
Trianthema oxycalyptrum	Aizoaceae	Caryophyllales	Angiosperm	Trianthema	oxycalyptrum	Aus	Aus	Sah	AU Kimberley Plateau
Trianthema oxycalyptrum	Aizoaceae	Caryophyllales	Angiosperm	Trianthema	oxycalyptrum	Aus	Aus	Sah	AU Western Desert
Trianthema patellitectum	Aizoaceae	Caryophyllales	Angiosperm	Trianthema	patellitectum	Aus	Aus	Sah	AU Arnhem Land
Trianthema patellitectum	Aizoaceae	Caryophyllales	Angiosperm	Trianthema	patellitectum	Aus	Aus	Sah	AU Kimberley Plateau
Trianthema pilosa	Aizoaceae	Caryophyllales	Angiosperm	Trianthema	pilosa	Ind/Tim	LSI	Wal	LSI
Trianthema pilosum	Aizoaceae	Caryophyllales	Angiosperm	Trianthema	pilosum	Aus	Aus	Sah	AU Arnhem Land
Trianthema pilosum	Aizoaceae	Caryophyllales	Angiosperm	Trianthema	pilosum	Aus	Aus	Sah	AU Central Desert
Trianthema pilosum	Aizoaceae	Caryophyllales	Angiosperm	Trianthema	pilosum	Aus	Aus	Sah	AU Central Queensland
Trianthema pilosum	Aizoaceae	Caryophyllales	Angiosperm	Trianthema	pilosum	Aus	Aus	Sah	AU Eastern Desert
Trianthema pilosum	Aizoaceae	Caryophyllales	Angiosperm	Trianthema	pilosum	Aus	Aus	Sah	AU Great Sandy Desert Interzone
Trianthema pilosum	Aizoaceae	Caryophyllales	Angiosperm	Trianthema	pilosum	Aus	Aus	Sah	AU Kimberley Plateau
Trianthema pilosum	Aizoaceae	Caryophyllales	Angiosperm	Trianthema	pilosum	Aus	Aus	Sah	AU Western Desert
Trianthema portulacastrum	Aizoaceae	Caryophyllales	Angiosperm	Trianthema	portulacastrum	Ind/PNG	NGu	Sah	NGu
Trianthema portulacastrum	Aizoaceae	Caryophyllales	Angiosperm	Trianthema	portulacastrum	Cam	MAs	Sun	MAs
Trianthema portulacastrum	Aizoaceae	Caryophyllales	Angiosperm	Trianthema	portulacastrum	Ind	Jav	Sun	Jav
Trianthema portulacastrum	Aizoaceae	Caryophyllales	Angiosperm	Trianthema	portulacastrum	Vie	MAs	Sun	MAs
Trianthema portulacastrum	Aizoaceae	Caryophyllales	Angiosperm	Trianthema	portulacastrum	Ind	Mlk	Wal	Mlk
Trianthema portulacastrum	Aizoaceae	Caryophyllales	Angiosperm	Trianthema	portulacastrum	Ind/Tim	LSI	Wal	LSI
Trianthema portulacastrum	Aizoaceae	Caryophyllales	Angiosperm	Trianthema	portulacastrum	Phi	Phi	Wal	Phi
Trianthema rhynchocalyptrum	Aizoaceae	Caryophyllales	Angiosperm	Trianthema	rhynchocalyptrum	Aus	Aus	Sah	AU Arnhem Land
Trianthema rhynchocalyptrum	Aizoaceae	Caryophyllales	Angiosperm	Trianthema	rhynchocalyptrum	Aus	Aus	Sah	AU Central Desert
Trianthema rhynchocalyptrum	Aizoaceae	Caryophyllales	Angiosperm	Trianthema	rhynchocalyptrum	Aus	Aus	Sah	AU Kimberley Plateau
Trianthema triquetra	Aizoaceae	Caryophyllales	Angiosperm	Trianthema	triquetra	Myn	MAs	Sun	MAs
Trianthema triquetra	Aizoaceae	Caryophyllales	Angiosperm	Trianthema	triquetra	Phi	Phi	Wal	Phi
Trianthema triquetrum	Aizoaceae	Caryophyllales	Angiosperm	Trianthema	triquetrum	Aus	Aus	Sah	AU Arnhem Land
Trianthema triquetrum	Aizoaceae	Caryophyllales	Angiosperm	Trianthema	triquetrum	Aus	Aus	Sah	AU Cape York Peninsula
Trianthema triquetrum	Aizoaceae	Caryophyllales	Angiosperm	Trianthema	triquetrum	Aus	Aus	Sah	AU Central Desert
Trianthema triquetrum	Aizoaceae	Caryophyllales	Angiosperm	Trianthema	triquetrum	Aus	Aus	Sah	AU Central Queensland
Trianthema triquetrum	Aizoaceae	Caryophyllales	Angiosperm	Trianthema	triquetrum	Aus	Aus	Sah	AU Eastern Desert
Trianthema triquetrum	Aizoaceae	Caryophyllales	Angiosperm	Trianthema	triquetrum	Aus	Aus	Sah	AU Eastern Queensland
Trianthema triquetrum	Aizoaceae	Caryophyllales	Angiosperm	Trianthema	triquetrum	Aus	Aus	Sah	AU Great Sandy Desert Interzone
Trianthema triquetrum	Aizoaceae	Caryophyllales	Angiosperm	Trianthema	triquetrum	Aus	Aus	Sah	AU Kimberley Plateau
Trianthema triquetrum	Aizoaceae	Caryophyllales	Angiosperm	Trianthema	triquetrum	Aus	Aus	Sah	AU Southeastern
Trianthema triquetrum	Aizoaceae	Caryophyllales	Angiosperm	Trianthema	triquetrum	Aus	Aus	Sah	AU Western Desert
Trianthema turgidifolium	Aizoaceae	Caryophyllales	Angiosperm	Trianthema	turgidifolium	Aus	Aus	Sah	AU Central Desert
Trianthema turgidifolium	Aizoaceae	Caryophyllales	Angiosperm	Trianthema	turgidifolium	Aus	Aus	Sah	AU Great Sandy Desert Interzone
Trianthema turgidifolium	Aizoaceae	Caryophyllales	Angiosperm	Trianthema	turgidifolium	Aus	Aus	Sah	AU Western Desert
Zaleya decandra	Aizoaceae	Caryophyllales	Angiosperm	Zaleya	decandra	Ind/Tim	LSI	Wal	LSI
Zaleya galericulata	Aizoaceae	Caryophyllales	Angiosperm	Zaleya	galericulata	Aus	Aus	Sah	AU Adelaide
Zaleya galericulata	Aizoaceae	Caryophyllales	Angiosperm	Zaleya	galericulata	Aus	Aus	Sah	AU Central Desert
Zaleya galericulata	Aizoaceae	Caryophyllales	Angiosperm	Zaleya	galericulata	Aus	Aus	Sah	AU Central Queensland
Zaleya galericulata	Aizoaceae	Caryophyllales	Angiosperm	Zaleya	galericulata	Aus	Aus	Sah	AU Eastern Desert
Zaleya galericulata	Aizoaceae	Caryophyllales	Angiosperm	Zaleya	galericulata	Aus	Aus	Sah	AU Eastern Queensland
Zaleya galericulata	Aizoaceae	Caryophyllales	Angiosperm	Zaleya	galericulata	Aus	Aus	Sah	AU Eyre Peninsula
Zaleya galericulata	Aizoaceae	Caryophyllales	Angiosperm	Zaleya	galericulata	Aus	Aus	Sah	AU Great Sandy Desert Interzone
Zaleya galericulata	Aizoaceae	Caryophyllales	Angiosperm	Zaleya	galericulata	Aus	Aus	Sah	AU Southeastern
Zaleya galericulata	Aizoaceae	Caryophyllales	Angiosperm	Zaleya	galericulata	Aus	Aus	Sah	AU Victoria
Zaleya galericulata	Aizoaceae	Caryophyllales	Angiosperm	Zaleya	galericulata	Aus	Aus	Sah	AU Western Desert
Akania bidwillii	Akaniaceae	Brassicales	Angiosperm	Akania	bidwillii	Aus	Aus	Sah	AU Eastern Queensland
Akania bidwillii	Akaniaceae	Brassicales	Angiosperm	Akania	bidwillii	Aus	Aus	Sah	AU Southeastern
Alisma plantago	Alismataceae	Alismatales	Angiosperm	Alisma	plantago	Myn	MAs	Sun	MAs
Alisma plantago-aquatica	Alismataceae	Alismatales	Angiosperm	Alisma	plantago-aquatica	Aus	Aus	Sah	AU Adelaide
Alisma plantago-aquatica	Alismataceae	Alismatales	Angiosperm	Alisma	plantago-aquatica	Aus	Aus	Sah	AU Eastern Desert
Alisma plantago-aquatica	Alismataceae	Alismatales	Angiosperm	Alisma	plantago-aquatica	Aus	Aus	Sah	AU Eastern Queensland
Alisma plantago-aquatica	Alismataceae	Alismatales	Angiosperm	Alisma	plantago-aquatica	Aus	Aus	Sah	AU Southeastern
Alisma plantago-aquatica	Alismataceae	Alismatales	Angiosperm	Alisma	plantago-aquatica	Aus	Aus	Sah	AU Southwestern
Alisma plantago-aquatica	Alismataceae	Alismatales	Angiosperm	Alisma	plantago-aquatica	Aus	Aus	Sah	AU Tasmania
Alisma plantago-aquatica	Alismataceae	Alismatales	Angiosperm	Alisma	plantago-aquatica	Aus	Aus	Sah	AU Victoria
Alisma plantago-aquatica	Alismataceae	Alismatales	Angiosperm	Alisma	plantago-aquatica	Myn	MAs	Sun	MAs
Alisma plantago-aquatica	Alismataceae	Alismatales	Angiosperm	Alisma	plantago-aquatica	Tha	MAs	Sun	MAs
Astonia australiensis	Alismataceae	Alismatales	Angiosperm	Astonia	australiensis	Aus	Aus	Sah	AU Cape York Peninsula
Butomopsis latifolia	Alismataceae	Alismatales	Angiosperm	Butomopsis	latifolia	Aus	Aus	Sah	AU Arnhem Land
Butomopsis latifolia	Alismataceae	Alismatales	Angiosperm	Butomopsis	latifolia	Aus	Aus	Sah	AU Cape York Peninsula
Butomopsis latifolia	Alismataceae	Alismatales	Angiosperm	Butomopsis	latifolia	Aus	Aus	Sah	AU Kimberley Plateau
Butomopsis latifolia	Alismataceae	Alismatales	Angiosperm	Butomopsis	latifolia	Lao	MAs	Sun	MAs
Caldesia acanthocarpa	Alismataceae	Alismatales	Angiosperm	Caldesia	acanthocarpa	Aus	Aus	Sah	AU Arnhem Land
Caldesia acanthocarpa	Alismataceae	Alismatales	Angiosperm	Caldesia	acanthocarpa	Aus	Aus	Sah	AU Cape York Peninsula
Caldesia acanthocarpa	Alismataceae	Alismatales	Angiosperm	Caldesia	acanthocarpa	Aus	Aus	Sah	AU Central Desert
Caldesia oligococca	Alismataceae	Alismatales	Angiosperm	Caldesia	oligococca	Aus	Aus	Sah	AU Arnhem Land
Caldesia oligococca	Alismataceae	Alismatales	Angiosperm	Caldesia	oligococca	Aus	Aus	Sah	AU Atherton Plateau
Caldesia oligococca	Alismataceae	Alismatales	Angiosperm	Caldesia	oligococca	Aus	Aus	Sah	AU Cape York Peninsula
Caldesia oligococca	Alismataceae	Alismatales	Angiosperm	Caldesia	oligococca	Aus	Aus	Sah	AU Central Desert
Caldesia oligococca	Alismataceae	Alismatales	Angiosperm	Caldesia	oligococca	Aus	Aus	Sah	AU Central Queensland
Caldesia oligococca	Alismataceae	Alismatales	Angiosperm	Caldesia	oligococca	Aus	Aus	Sah	AU Eastern Desert
Caldesia oligococca	Alismataceae	Alismatales	Angiosperm	Caldesia	oligococca	Aus	Aus	Sah	AU Eastern Queensland
Caldesia oligococca	Alismataceae	Alismatales	Angiosperm	Caldesia	oligococca	Aus	Aus	Sah	AU Kimberley Plateau
Caldesia oligococca	Alismataceae	Alismatales	Angiosperm	Caldesia	oligococca	Tha	MAs	Sun	MAs
Caldesia parnassifolia	Alismataceae	Alismatales	Angiosperm	Caldesia	parnassifolia	Aus	Aus	Sah	AU Atherton Plateau
Caldesia parnassifolia	Alismataceae	Alismatales	Angiosperm	Caldesia	parnassifolia	Aus	Aus	Sah	AU Cape York Peninsula
Caldesia parnassifolia	Alismataceae	Alismatales	Angiosperm	Caldesia	parnassifolia	Aus	Aus	Sah	AU Central Queensland
Caldesia parnassifolia	Alismataceae	Alismatales	Angiosperm	Caldesia	parnassifolia	Ind/PNG	NGu	Sah	NGu
Caldesia parnassifolia	Alismataceae	Alismatales	Angiosperm	Caldesia	parnassifolia	Tha	MAs	Sun	MAs
Damasonium minus	Alismataceae	Alismatales	Angiosperm	Damasonium	minus	Aus	Aus	Sah	AU Adelaide
Damasonium minus	Alismataceae	Alismatales	Angiosperm	Damasonium	minus	Aus	Aus	Sah	AU Central Queensland
Damasonium minus	Alismataceae	Alismatales	Angiosperm	Damasonium	minus	Aus	Aus	Sah	AU Eastern Desert
Damasonium minus	Alismataceae	Alismatales	Angiosperm	Damasonium	minus	Aus	Aus	Sah	AU Eastern Queensland
Damasonium minus	Alismataceae	Alismatales	Angiosperm	Damasonium	minus	Aus	Aus	Sah	AU Eyre Peninsula
Damasonium minus	Alismataceae	Alismatales	Angiosperm	Damasonium	minus	Aus	Aus	Sah	AU Southeastern
Damasonium minus	Alismataceae	Alismatales	Angiosperm	Damasonium	minus	Aus	Aus	Sah	AU Southwest Interzone
Damasonium minus	Alismataceae	Alismatales	Angiosperm	Damasonium	minus	Aus	Aus	Sah	AU Southwestern
Damasonium minus	Alismataceae	Alismatales	Angiosperm	Damasonium	minus	Aus	Aus	Sah	AU Tasmania
Damasonium minus	Alismataceae	Alismatales	Angiosperm	Damasonium	minus	Aus	Aus	Sah	AU Victoria
Echinodorus palaefolius	Alismataceae	Alismatales	Angiosperm	Echinodorus	palaefolius	Sin	MAs	Sun	MAs
Limnocharis flava	Alismataceae	Alismatales	Angiosperm	Limnocharis	flava	Ind/PNG	NGu	Sah	NGu
Limnocharis flava	Alismataceae	Alismatales	Angiosperm	Limnocharis	flava	Ind	Jav	Sun	Jav
Limnocharis flava	Alismataceae	Alismatales	Angiosperm	Limnocharis	flava	Ind/Mly/Bru	Bor	Sun	Bor
Limnocharis flava	Alismataceae	Alismatales	Angiosperm	Limnocharis	flava	Lao	MAs	Sun	MAs
Limnocharis flava	Alismataceae	Alismatales	Angiosperm	Limnocharis	flava	Mly	MAs	Sun	MAs
Limnocharis flava	Alismataceae	Alismatales	Angiosperm	Limnocharis	flava	Myn	MAs	Sun	MAs
Limnocharis flava	Alismataceae	Alismatales	Angiosperm	Limnocharis	flava	Sin	MAs	Sun	MAs
Limnocharis flava	Alismataceae	Alismatales	Angiosperm	Limnocharis	flava	Ind	Sul	Wal	Sul
Limnocharis flava	Alismataceae	Alismatales	Angiosperm	Limnocharis	flava	Ind/Tim	LSI	Wal	LSI
Limnophyton obtusifolium	Alismataceae	Alismatales	Angiosperm	Limnophyton	obtusifolium	Lao	MAs	Sun	MAs
Limnophyton obtusifolium	Alismataceae	Alismatales	Angiosperm	Limnophyton	obtusifolium	Ind/Tim	LSI	Wal	LSI
Ranalisma rostrata	Alismataceae	Alismatales	Angiosperm	Ranalisma	rostrata	Mly	MAs	Sun	MAs
Sagittaria aginashii	Alismataceae	Alismatales	Angiosperm	Sagittaria	aginashii	Ind	Jav	Sun	Jav
Sagittaria brevirostra	Alismataceae	Alismatales	Angiosperm	Sagittaria	brevirostra	Aus	Aus	Sah	AU Unclassified
Sagittaria guayanensis	Alismataceae	Alismatales	Angiosperm	Sagittaria	guayanensis	Ind/PNG	NGu	Sah	NGu
Sagittaria guayanensis	Alismataceae	Alismatales	Angiosperm	Sagittaria	guayanensis	Lao	MAs	Sun	MAs
Sagittaria guayanensis	Alismataceae	Alismatales	Angiosperm	Sagittaria	guayanensis	Mly	MAs	Sun	MAs
Sagittaria guayanensis	Alismataceae	Alismatales	Angiosperm	Sagittaria	guayanensis	Myn	MAs	Sun	MAs
Sagittaria guayanensis	Alismataceae	Alismatales	Angiosperm	Sagittaria	guayanensis	Tha	MAs	Sun	MAs
Sagittaria latifolia	Alismataceae	Alismatales	Angiosperm	Sagittaria	latifolia	Sin	MAs	Sun	MAs
Sagittaria sagittifolia	Alismataceae	Alismatales	Angiosperm	Sagittaria	sagittifolia	Lao	MAs	Sun	MAs
Sagittaria sagittifolia	Alismataceae	Alismatales	Angiosperm	Sagittaria	sagittifolia	Myn	MAs	Sun	MAs
Sagittaria sagittifolia	Alismataceae	Alismatales	Angiosperm	Sagittaria	sagittifolia	Sin	MAs	Sun	MAs
Sagittaria sagittifolia	Alismataceae	Alismatales	Angiosperm	Sagittaria	sagittifolia	Tha	MAs	Sun	MAs
Sagittaria sagittifolia	Alismataceae	Alismatales	Angiosperm	Sagittaria	sagittifolia	Phi	Phi	Wal	Phi
Sagittaria subulata	Alismataceae	Alismatales	Angiosperm	Sagittaria	subulata	Ind/PNG	NGu	Sah	NGu
Sagittaria trifolia	Alismataceae	Alismatales	Angiosperm	Sagittaria	trifolia	Tha	MAs	Sun	MAs
Sagittaria trifolia	Alismataceae	Alismatales	Angiosperm	Sagittaria	trifolia	Phi	Phi	Wal	Phi
Crispiloba disperma	Alseuosmiaceae	Asterales	Angiosperm	Crispiloba	disperma	Aus	Aus	Sah	AU Atherton Plateau
Wittsteinia vacciniacea	Alseuosmiaceae	Asterales	Angiosperm	Wittsteinia	vacciniacea	Aus	Aus	Sah	AU Victoria
Altingia cambodiana	Altingiaceae	Saxifragales	Angiosperm	Altingia	cambodiana	Cam	MAs	Sun	MAs
Altingia cambodiana	Altingiaceae	Saxifragales	Angiosperm	Altingia	cambodiana	Vie	MAs	Sun	MAs
Altingia chinensis	Altingiaceae	Saxifragales	Angiosperm	Altingia	chinensis	Lao	MAs	Sun	MAs
Altingia excelsa	Altingiaceae	Saxifragales	Angiosperm	Altingia	excelsa	Cam	MAs	Sun	MAs
Altingia excelsa	Altingiaceae	Saxifragales	Angiosperm	Altingia	excelsa	Ind	Jav	Sun	Jav
Altingia excelsa	Altingiaceae	Saxifragales	Angiosperm	Altingia	excelsa	Ind	Sum	Sun	Sum
Altingia excelsa	Altingiaceae	Saxifragales	Angiosperm	Altingia	excelsa	Mly	MAs	Sun	MAs
Altingia excelsa	Altingiaceae	Saxifragales	Angiosperm	Altingia	excelsa	Myn	MAs	Sun	MAs
Altingia siamensis	Altingiaceae	Saxifragales	Angiosperm	Altingia	siamensis	Cam	MAs	Sun	MAs
Altingia siamensis	Altingiaceae	Saxifragales	Angiosperm	Altingia	siamensis	Lao	MAs	Sun	MAs
Altingia siamensis	Altingiaceae	Saxifragales	Angiosperm	Altingia	siamensis	Vie	MAs	Sun	MAs
Liquidambar formosana	Altingiaceae	Saxifragales	Angiosperm	Liquidambar	formosana	Lao	MAs	Sun	MAs
Liquidambar formosana	Altingiaceae	Saxifragales	Angiosperm	Liquidambar	formosana	Vie	MAs	Sun	MAs
Achyranthes arborescens	Amaranthaceae	Caryophyllales	Angiosperm	Achyranthes	arborescens	Aus	Aus	Sah	AU External Territories
Achyranthes aspera	Amaranthaceae	Caryophyllales	Angiosperm	Achyranthes	aspera	Aus	Aus	Sah	AU Arnhem Land
Achyranthes aspera	Amaranthaceae	Caryophyllales	Angiosperm	Achyranthes	aspera	Aus	Aus	Sah	AU Atherton Plateau
Achyranthes aspera	Amaranthaceae	Caryophyllales	Angiosperm	Achyranthes	aspera	Aus	Aus	Sah	AU Cape York Peninsula
Achyranthes aspera	Amaranthaceae	Caryophyllales	Angiosperm	Achyranthes	aspera	Aus	Aus	Sah	AU Central Desert
Achyranthes aspera	Amaranthaceae	Caryophyllales	Angiosperm	Achyranthes	aspera	Aus	Aus	Sah	AU Central Queensland
Achyranthes aspera	Amaranthaceae	Caryophyllales	Angiosperm	Achyranthes	aspera	Aus	Aus	Sah	AU Eastern Desert
Achyranthes aspera	Amaranthaceae	Caryophyllales	Angiosperm	Achyranthes	aspera	Aus	Aus	Sah	AU Eastern Queensland
Achyranthes aspera	Amaranthaceae	Caryophyllales	Angiosperm	Achyranthes	aspera	Aus	Aus	Sah	AU External Territories
Achyranthes aspera	Amaranthaceae	Caryophyllales	Angiosperm	Achyranthes	aspera	Aus	Aus	Sah	AU Great Sandy Desert Interzone
Achyranthes aspera	Amaranthaceae	Caryophyllales	Angiosperm	Achyranthes	aspera	Aus	Aus	Sah	AU Kimberley Plateau
Achyranthes aspera	Amaranthaceae	Caryophyllales	Angiosperm	Achyranthes	aspera	Aus	Aus	Sah	AU Southeastern
Achyranthes aspera	Amaranthaceae	Caryophyllales	Angiosperm	Achyranthes	aspera	Aus	Aus	Sah	AU Western Desert
Achyranthes aspera	Amaranthaceae	Caryophyllales	Angiosperm	Achyranthes	aspera	Ind/PNG	NGu	Sah	NGu
Achyranthes aspera	Amaranthaceae	Caryophyllales	Angiosperm	Achyranthes	aspera	Cam	MAs	Sun	MAs
Achyranthes aspera	Amaranthaceae	Caryophyllales	Angiosperm	Achyranthes	aspera	Ind	Jav	Sun	Jav
Achyranthes aspera	Amaranthaceae	Caryophyllales	Angiosperm	Achyranthes	aspera	Lao	MAs	Sun	MAs
Achyranthes aspera	Amaranthaceae	Caryophyllales	Angiosperm	Achyranthes	aspera	Mly	MAs	Sun	MAs
Achyranthes aspera	Amaranthaceae	Caryophyllales	Angiosperm	Achyranthes	aspera	Myn	MAs	Sun	MAs
Achyranthes aspera	Amaranthaceae	Caryophyllales	Angiosperm	Achyranthes	aspera	Sin	MAs	Sun	MAs
Achyranthes aspera	Amaranthaceae	Caryophyllales	Angiosperm	Achyranthes	aspera	Vie	MAs	Sun	MAs
Achyranthes aspera	Amaranthaceae	Caryophyllales	Angiosperm	Achyranthes	aspera	Ind	Mlk	Wal	Mlk
Achyranthes aspera	Amaranthaceae	Caryophyllales	Angiosperm	Achyranthes	aspera	Ind	Sul	Wal	Sul
Achyranthes aspera	Amaranthaceae	Caryophyllales	Angiosperm	Achyranthes	aspera	Ind/Tim	LSI	Wal	LSI
Achyranthes aspera	Amaranthaceae	Caryophyllales	Angiosperm	Achyranthes	aspera	Phi	Phi	Wal	Phi
Achyranthes bidentata	Amaranthaceae	Caryophyllales	Angiosperm	Achyranthes	bidentata	Ind/PNG	NGu	Sah	NGu
Achyranthes bidentata	Amaranthaceae	Caryophyllales	Angiosperm	Achyranthes	bidentata	Ind	Jav	Sun	Jav
Achyranthes bidentata	Amaranthaceae	Caryophyllales	Angiosperm	Achyranthes	bidentata	Ind	Sum	Sun	Sum
Achyranthes bidentata	Amaranthaceae	Caryophyllales	Angiosperm	Achyranthes	bidentata	Ind/Mly/Bru	Bor	Sun	Bor
Achyranthes bidentata	Amaranthaceae	Caryophyllales	Angiosperm	Achyranthes	bidentata	Lao	MAs	Sun	MAs
Achyranthes bidentata	Amaranthaceae	Caryophyllales	Angiosperm	Achyranthes	bidentata	Myn	MAs	Sun	MAs
Achyranthes bidentata	Amaranthaceae	Caryophyllales	Angiosperm	Achyranthes	bidentata	Ind	Mlk	Wal	Mlk
Achyranthes bidentata	Amaranthaceae	Caryophyllales	Angiosperm	Achyranthes	bidentata	Ind	Sul	Wal	Sul
Achyranthes bidentata	Amaranthaceae	Caryophyllales	Angiosperm	Achyranthes	bidentata	Phi	Phi	Wal	Phi
Achyranthes margaretarum	Amaranthaceae	Caryophyllales	Angiosperm	Achyranthes	margaretarum	Aus	Aus	Sah	AU External Territories
Aerva glabrata	Amaranthaceae	Caryophyllales	Angiosperm	Aerva	glabrata	Myn	MAs	Sun	MAs
Aerva lanata	Amaranthaceae	Caryophyllales	Angiosperm	Aerva	lanata	Aus	Aus	Sah	AU External Territories
Aerva lanata	Amaranthaceae	Caryophyllales	Angiosperm	Aerva	lanata	Ind/PNG	NGu	Sah	NGu
Aerva lanata	Amaranthaceae	Caryophyllales	Angiosperm	Aerva	lanata	Ind	Mlk	Wal	Mlk
Aerva lanata	Amaranthaceae	Caryophyllales	Angiosperm	Aerva	lanata	Ind/Tim	LSI	Wal	LSI
Aerva lanata	Amaranthaceae	Caryophyllales	Angiosperm	Aerva	lanata	Phi	Phi	Wal	Phi
Aerva monsonia	Amaranthaceae	Caryophyllales	Angiosperm	Aerva	monsonia	Myn	MAs	Sun	MAs
Aerva sanguinolenta	Amaranthaceae	Caryophyllales	Angiosperm	Aerva	sanguinolenta	Lao	MAs	Sun	MAs
Aerva sanguinolenta	Amaranthaceae	Caryophyllales	Angiosperm	Aerva	sanguinolenta	Myn	MAs	Sun	MAs
Aerva sanguinolenta	Amaranthaceae	Caryophyllales	Angiosperm	Aerva	sanguinolenta	Ind/Tim	LSI	Wal	LSI
Aerva sanguinolenta	Amaranthaceae	Caryophyllales	Angiosperm	Aerva	sanguinolenta	Phi	Phi	Wal	Phi
Allmania nodiflora	Amaranthaceae	Caryophyllales	Angiosperm	Allmania	nodiflora	Lao	MAs	Sun	MAs
Allmania nodiflora	Amaranthaceae	Caryophyllales	Angiosperm	Allmania	nodiflora	Sin	MAs	Sun	MAs
Allmania nodiflora	Amaranthaceae	Caryophyllales	Angiosperm	Allmania	nodiflora	Ind/Tim	LSI	Wal	LSI
Allmania nodiflora	Amaranthaceae	Caryophyllales	Angiosperm	Allmania	nodiflora	Phi	Phi	Wal	Phi
Alternanthera angustifolia	Amaranthaceae	Caryophyllales	Angiosperm	Alternanthera	angustifolia	Aus	Aus	Sah	AU Adelaide
Alternanthera angustifolia	Amaranthaceae	Caryophyllales	Angiosperm	Alternanthera	angustifolia	Aus	Aus	Sah	AU Arnhem Land
Alternanthera angustifolia	Amaranthaceae	Caryophyllales	Angiosperm	Alternanthera	angustifolia	Aus	Aus	Sah	AU Atherton Plateau
Alternanthera angustifolia	Amaranthaceae	Caryophyllales	Angiosperm	Alternanthera	angustifolia	Aus	Aus	Sah	AU Cape York Peninsula
Alternanthera angustifolia	Amaranthaceae	Caryophyllales	Angiosperm	Alternanthera	angustifolia	Aus	Aus	Sah	AU Central Desert
Alternanthera angustifolia	Amaranthaceae	Caryophyllales	Angiosperm	Alternanthera	angustifolia	Aus	Aus	Sah	AU Central Queensland
Alternanthera angustifolia	Amaranthaceae	Caryophyllales	Angiosperm	Alternanthera	angustifolia	Aus	Aus	Sah	AU Eastern Desert
Alternanthera angustifolia	Amaranthaceae	Caryophyllales	Angiosperm	Alternanthera	angustifolia	Aus	Aus	Sah	AU Eastern Queensland
Alternanthera angustifolia	Amaranthaceae	Caryophyllales	Angiosperm	Alternanthera	angustifolia	Aus	Aus	Sah	AU Eyre Peninsula
Alternanthera angustifolia	Amaranthaceae	Caryophyllales	Angiosperm	Alternanthera	angustifolia	Aus	Aus	Sah	AU Great Sandy Desert Interzone
Alternanthera angustifolia	Amaranthaceae	Caryophyllales	Angiosperm	Alternanthera	angustifolia	Aus	Aus	Sah	AU Kimberley Plateau
Alternanthera angustifolia	Amaranthaceae	Caryophyllales	Angiosperm	Alternanthera	angustifolia	Aus	Aus	Sah	AU Southeastern
Alternanthera angustifolia	Amaranthaceae	Caryophyllales	Angiosperm	Alternanthera	angustifolia	Aus	Aus	Sah	AU Western Desert
Alternanthera bettzichiana	Amaranthaceae	Caryophyllales	Angiosperm	Alternanthera	bettzichiana	Mly	MAs	Sun	MAs
Alternanthera bettzickiana	Amaranthaceae	Caryophyllales	Angiosperm	Alternanthera	bettzickiana	Ind/PNG	NGu	Sah	NGu
Alternanthera bettzickiana	Amaranthaceae	Caryophyllales	Angiosperm	Alternanthera	bettzickiana	Lao	MAs	Sun	MAs
Alternanthera bettzickiana	Amaranthaceae	Caryophyllales	Angiosperm	Alternanthera	bettzickiana	Sin	MAs	Sun	MAs
Alternanthera bettzickiana	Amaranthaceae	Caryophyllales	Angiosperm	Alternanthera	bettzickiana	Tha	MAs	Sun	MAs
Alternanthera bettzickiana	Amaranthaceae	Caryophyllales	Angiosperm	Alternanthera	bettzickiana	Ind	Mlk	Wal	Mlk
Alternanthera bettzickiana	Amaranthaceae	Caryophyllales	Angiosperm	Alternanthera	bettzickiana	Phi	Phi	Wal	Phi
Alternanthera brasiliana	Amaranthaceae	Caryophyllales	Angiosperm	Alternanthera	brasiliana	Ind/PNG	NGu	Sah	NGu
Alternanthera brasiliana	Amaranthaceae	Caryophyllales	Angiosperm	Alternanthera	brasiliana	Phi	Phi	Wal	Phi
Alternanthera denticulata	Amaranthaceae	Caryophyllales	Angiosperm	Alternanthera	denticulata	Aus	Aus	Sah	AU Adelaide
Alternanthera denticulata	Amaranthaceae	Caryophyllales	Angiosperm	Alternanthera	denticulata	Aus	Aus	Sah	AU Arnhem Land
Alternanthera denticulata	Amaranthaceae	Caryophyllales	Angiosperm	Alternanthera	denticulata	Aus	Aus	Sah	AU Atherton Plateau
Alternanthera denticulata	Amaranthaceae	Caryophyllales	Angiosperm	Alternanthera	denticulata	Aus	Aus	Sah	AU Cape York Peninsula
Alternanthera denticulata	Amaranthaceae	Caryophyllales	Angiosperm	Alternanthera	denticulata	Aus	Aus	Sah	AU Central Desert
Alternanthera denticulata	Amaranthaceae	Caryophyllales	Angiosperm	Alternanthera	denticulata	Aus	Aus	Sah	AU Central Queensland
Alternanthera denticulata	Amaranthaceae	Caryophyllales	Angiosperm	Alternanthera	denticulata	Aus	Aus	Sah	AU Eastern Desert
Alternanthera denticulata	Amaranthaceae	Caryophyllales	Angiosperm	Alternanthera	denticulata	Aus	Aus	Sah	AU Eastern Queensland
Alternanthera denticulata	Amaranthaceae	Caryophyllales	Angiosperm	Alternanthera	denticulata	Aus	Aus	Sah	AU Eyre Peninsula
Alternanthera denticulata	Amaranthaceae	Caryophyllales	Angiosperm	Alternanthera	denticulata	Aus	Aus	Sah	AU Great Sandy Desert Interzone
Alternanthera denticulata	Amaranthaceae	Caryophyllales	Angiosperm	Alternanthera	denticulata	Aus	Aus	Sah	AU Kimberley Plateau
Alternanthera denticulata	Amaranthaceae	Caryophyllales	Angiosperm	Alternanthera	denticulata	Aus	Aus	Sah	AU Southeastern
Alternanthera denticulata	Amaranthaceae	Caryophyllales	Angiosperm	Alternanthera	denticulata	Aus	Aus	Sah	AU Southwest Interzone
Alternanthera denticulata	Amaranthaceae	Caryophyllales	Angiosperm	Alternanthera	denticulata	Aus	Aus	Sah	AU Southwestern
Alternanthera denticulata	Amaranthaceae	Caryophyllales	Angiosperm	Alternanthera	denticulata	Aus	Aus	Sah	AU Tasmania
Alternanthera denticulata	Amaranthaceae	Caryophyllales	Angiosperm	Alternanthera	denticulata	Aus	Aus	Sah	AU Victoria
Alternanthera denticulata	Amaranthaceae	Caryophyllales	Angiosperm	Alternanthera	denticulata	Aus	Aus	Sah	AU Western Desert
Alternanthera ficoidea	Amaranthaceae	Caryophyllales	Angiosperm	Alternanthera	ficoidea	Aus	Aus	Sah	AU Arnhem Land
Alternanthera ficoidea	Amaranthaceae	Caryophyllales	Angiosperm	Alternanthera	ficoidea	Aus	Aus	Sah	AU Atherton Plateau
Alternanthera ficoidea	Amaranthaceae	Caryophyllales	Angiosperm	Alternanthera	ficoidea	Aus	Aus	Sah	AU Cape York Peninsula
Alternanthera ficoidea	Amaranthaceae	Caryophyllales	Angiosperm	Alternanthera	ficoidea	Aus	Aus	Sah	AU Central Queensland
Alternanthera ficoidea	Amaranthaceae	Caryophyllales	Angiosperm	Alternanthera	ficoidea	Aus	Aus	Sah	AU Eastern Queensland
Alternanthera ficoidea	Amaranthaceae	Caryophyllales	Angiosperm	Alternanthera	ficoidea	Aus	Aus	Sah	AU Kimberley Plateau
Alternanthera ficoidea	Amaranthaceae	Caryophyllales	Angiosperm	Alternanthera	ficoidea	Ind/PNG	NGu	Sah	NGu
Alternanthera ficoidea	Amaranthaceae	Caryophyllales	Angiosperm	Alternanthera	ficoidea	Sin	MAs	Sun	MAs
Alternanthera ficoidea	Amaranthaceae	Caryophyllales	Angiosperm	Alternanthera	ficoidea	Tha	MAs	Sun	MAs
Alternanthera ficoidea	Amaranthaceae	Caryophyllales	Angiosperm	Alternanthera	ficoidea	Ind/Tim	LSI	Wal	LSI
Alternanthera nahui	Amaranthaceae	Caryophyllales	Angiosperm	Alternanthera	nahui	Aus	Aus	Sah	AU External Territories
Alternanthera nana	Amaranthaceae	Caryophyllales	Angiosperm	Alternanthera	nana	Aus	Aus	Sah	AU Arnhem Land
Alternanthera nana	Amaranthaceae	Caryophyllales	Angiosperm	Alternanthera	nana	Aus	Aus	Sah	AU Atherton Plateau
Alternanthera nana	Amaranthaceae	Caryophyllales	Angiosperm	Alternanthera	nana	Aus	Aus	Sah	AU Cape York Peninsula
Alternanthera nana	Amaranthaceae	Caryophyllales	Angiosperm	Alternanthera	nana	Aus	Aus	Sah	AU Central Desert
Alternanthera nana	Amaranthaceae	Caryophyllales	Angiosperm	Alternanthera	nana	Aus	Aus	Sah	AU Central Queensland
Alternanthera nana	Amaranthaceae	Caryophyllales	Angiosperm	Alternanthera	nana	Aus	Aus	Sah	AU Eastern Desert
Alternanthera nana	Amaranthaceae	Caryophyllales	Angiosperm	Alternanthera	nana	Aus	Aus	Sah	AU Eastern Queensland
Alternanthera nana	Amaranthaceae	Caryophyllales	Angiosperm	Alternanthera	nana	Aus	Aus	Sah	AU Eyre Peninsula
Alternanthera nana	Amaranthaceae	Caryophyllales	Angiosperm	Alternanthera	nana	Aus	Aus	Sah	AU Great Sandy Desert Interzone
Alternanthera nana	Amaranthaceae	Caryophyllales	Angiosperm	Alternanthera	nana	Aus	Aus	Sah	AU Kimberley Plateau
Alternanthera nana	Amaranthaceae	Caryophyllales	Angiosperm	Alternanthera	nana	Aus	Aus	Sah	AU Southeastern
Alternanthera nana	Amaranthaceae	Caryophyllales	Angiosperm	Alternanthera	nana	Aus	Aus	Sah	AU Western Desert
Alternanthera nodiflora	Amaranthaceae	Caryophyllales	Angiosperm	Alternanthera	nodiflora	Aus	Aus	Sah	AU Adelaide
Alternanthera nodiflora	Amaranthaceae	Caryophyllales	Angiosperm	Alternanthera	nodiflora	Aus	Aus	Sah	AU Arnhem Land
Alternanthera nodiflora	Amaranthaceae	Caryophyllales	Angiosperm	Alternanthera	nodiflora	Aus	Aus	Sah	AU Cape York Peninsula
Alternanthera nodiflora	Amaranthaceae	Caryophyllales	Angiosperm	Alternanthera	nodiflora	Aus	Aus	Sah	AU Central Desert
Alternanthera nodiflora	Amaranthaceae	Caryophyllales	Angiosperm	Alternanthera	nodiflora	Aus	Aus	Sah	AU Central Queensland
Alternanthera nodiflora	Amaranthaceae	Caryophyllales	Angiosperm	Alternanthera	nodiflora	Aus	Aus	Sah	AU Eastern Desert
Alternanthera nodiflora	Amaranthaceae	Caryophyllales	Angiosperm	Alternanthera	nodiflora	Aus	Aus	Sah	AU Eastern Queensland
Alternanthera nodiflora	Amaranthaceae	Caryophyllales	Angiosperm	Alternanthera	nodiflora	Aus	Aus	Sah	AU Eyre Peninsula
Alternanthera nodiflora	Amaranthaceae	Caryophyllales	Angiosperm	Alternanthera	nodiflora	Aus	Aus	Sah	AU Great Sandy Desert Interzone
Alternanthera nodiflora	Amaranthaceae	Caryophyllales	Angiosperm	Alternanthera	nodiflora	Aus	Aus	Sah	AU Kimberley Plateau
Alternanthera nodiflora	Amaranthaceae	Caryophyllales	Angiosperm	Alternanthera	nodiflora	Aus	Aus	Sah	AU Southwestern
Alternanthera nodiflora	Amaranthaceae	Caryophyllales	Angiosperm	Alternanthera	nodiflora	Aus	Aus	Sah	AU Tasmania
Alternanthera nodiflora	Amaranthaceae	Caryophyllales	Angiosperm	Alternanthera	nodiflora	Aus	Aus	Sah	AU Victoria
Alternanthera nodiflora	Amaranthaceae	Caryophyllales	Angiosperm	Alternanthera	nodiflora	Aus	Aus	Sah	AU Western Desert
Alternanthera paronychioides	Amaranthaceae	Caryophyllales	Angiosperm	Alternanthera	paronychioides	Lao	MAs	Sun	MAs
Alternanthera paronychioides	Amaranthaceae	Caryophyllales	Angiosperm	Alternanthera	paronychioides	Sin	MAs	Sun	MAs
Alternanthera paronychioides	Amaranthaceae	Caryophyllales	Angiosperm	Alternanthera	paronychioides	Phi	Phi	Wal	Phi
Alternanthera philoxeroides	Amaranthaceae	Caryophyllales	Angiosperm	Alternanthera	philoxeroides	Ind/PNG	NGu	Sah	NGu
Alternanthera philoxeroides	Amaranthaceae	Caryophyllales	Angiosperm	Alternanthera	philoxeroides	Ind	Jav	Sun	Jav
Alternanthera philoxeroides	Amaranthaceae	Caryophyllales	Angiosperm	Alternanthera	philoxeroides	Ind/Mly/Bru	Bor	Sun	Bor
Alternanthera philoxeroides	Amaranthaceae	Caryophyllales	Angiosperm	Alternanthera	philoxeroides	Mly	MAs	Sun	MAs
Alternanthera philoxeroides	Amaranthaceae	Caryophyllales	Angiosperm	Alternanthera	philoxeroides	Sin	MAs	Sun	MAs
Alternanthera philoxeroides	Amaranthaceae	Caryophyllales	Angiosperm	Alternanthera	philoxeroides	Ind/Tim	LSI	Wal	LSI
Alternanthera pulchella	Amaranthaceae	Caryophyllales	Angiosperm	Alternanthera	pulchella	Phi	Phi	Wal	Phi
Alternanthera pungens	Amaranthaceae	Caryophyllales	Angiosperm	Alternanthera	pungens	Ind/PNG	NGu	Sah	NGu
Alternanthera pungens	Amaranthaceae	Caryophyllales	Angiosperm	Alternanthera	pungens	Lao	MAs	Sun	MAs
Alternanthera pungens	Amaranthaceae	Caryophyllales	Angiosperm	Alternanthera	pungens	Myn	MAs	Sun	MAs
Alternanthera pungens	Amaranthaceae	Caryophyllales	Angiosperm	Alternanthera	pungens	Ind	Sul	Wal	Sul
Alternanthera pungens	Amaranthaceae	Caryophyllales	Angiosperm	Alternanthera	pungens	Ind/Tim	LSI	Wal	LSI
Alternanthera ramosissima	Amaranthaceae	Caryophyllales	Angiosperm	Alternanthera	ramosissima	Ind/PNG	NGu	Sah	NGu
Alternanthera ramosissima	Amaranthaceae	Caryophyllales	Angiosperm	Alternanthera	ramosissima	Ind	Jav	Sun	Jav
Alternanthera sessilis	Amaranthaceae	Caryophyllales	Angiosperm	Alternanthera	sessilis	Ind/PNG	NGu	Sah	NGu
Alternanthera sessilis	Amaranthaceae	Caryophyllales	Angiosperm	Alternanthera	sessilis	Cam	MAs	Sun	MAs
Alternanthera sessilis	Amaranthaceae	Caryophyllales	Angiosperm	Alternanthera	sessilis	Ind	Jav	Sun	Jav
Alternanthera sessilis	Amaranthaceae	Caryophyllales	Angiosperm	Alternanthera	sessilis	Ind/Mly/Bru	Bor	Sun	Bor
Alternanthera sessilis	Amaranthaceae	Caryophyllales	Angiosperm	Alternanthera	sessilis	Lao	MAs	Sun	MAs
Alternanthera sessilis	Amaranthaceae	Caryophyllales	Angiosperm	Alternanthera	sessilis	Myn	MAs	Sun	MAs
Alternanthera sessilis	Amaranthaceae	Caryophyllales	Angiosperm	Alternanthera	sessilis	Sin	MAs	Sun	MAs
Alternanthera sessilis	Amaranthaceae	Caryophyllales	Angiosperm	Alternanthera	sessilis	Vie	MAs	Sun	MAs
Alternanthera sessilis	Amaranthaceae	Caryophyllales	Angiosperm	Alternanthera	sessilis	Ind	Mlk	Wal	Mlk
Alternanthera sessilis	Amaranthaceae	Caryophyllales	Angiosperm	Alternanthera	sessilis	Ind	Sul	Wal	Sul
Alternanthera sessilis	Amaranthaceae	Caryophyllales	Angiosperm	Alternanthera	sessilis	Ind/Tim	LSI	Wal	LSI
Alternanthera sessilis	Amaranthaceae	Caryophyllales	Angiosperm	Alternanthera	sessilis	Phi	Phi	Wal	Phi
Amaranthus blitum	Amaranthaceae	Caryophyllales	Angiosperm	Amaranthus	blitum	Ind/PNG	NGu	Sah	NGu
Amaranthus blitum	Amaranthaceae	Caryophyllales	Angiosperm	Amaranthus	blitum	Ind	Jav	Sun	Jav
Amaranthus blitum	Amaranthaceae	Caryophyllales	Angiosperm	Amaranthus	blitum	Lao	MAs	Sun	MAs
Amaranthus blitum	Amaranthaceae	Caryophyllales	Angiosperm	Amaranthus	blitum	Mly	MAs	Sun	MAs
Amaranthus blitum	Amaranthaceae	Caryophyllales	Angiosperm	Amaranthus	blitum	Sin	MAs	Sun	MAs
Amaranthus blitum	Amaranthaceae	Caryophyllales	Angiosperm	Amaranthus	blitum	Tha	MAs	Sun	MAs
Amaranthus caudatus	Amaranthaceae	Caryophyllales	Angiosperm	Amaranthus	caudatus	Ind/PNG	NGu	Sah	NGu
Amaranthus caudatus	Amaranthaceae	Caryophyllales	Angiosperm	Amaranthus	caudatus	Mly	MAs	Sun	MAs
Amaranthus caudatus	Amaranthaceae	Caryophyllales	Angiosperm	Amaranthus	caudatus	Phi	Phi	Wal	Phi
Amaranthus centralis	Amaranthaceae	Caryophyllales	Angiosperm	Amaranthus	centralis	Aus	Aus	Sah	AU Eastern Desert
Amaranthus centralis	Amaranthaceae	Caryophyllales	Angiosperm	Amaranthus	centralis	Aus	Aus	Sah	AU Western Desert
Amaranthus clementii	Amaranthaceae	Caryophyllales	Angiosperm	Amaranthus	clementii	Aus	Aus	Sah	AU Great Sandy Desert Interzone
Amaranthus clementii	Amaranthaceae	Caryophyllales	Angiosperm	Amaranthus	clementii	Aus	Aus	Sah	AU Southwestern
Amaranthus clementii	Amaranthaceae	Caryophyllales	Angiosperm	Amaranthus	clementii	Aus	Aus	Sah	AU Western Desert
Amaranthus cochleitepalus	Amaranthaceae	Caryophyllales	Angiosperm	Amaranthus	cochleitepalus	Aus	Aus	Sah	AU Arnhem Land
Amaranthus cochleitepalus	Amaranthaceae	Caryophyllales	Angiosperm	Amaranthus	cochleitepalus	Aus	Aus	Sah	AU Cape York Peninsula
Amaranthus cochleitepalus	Amaranthaceae	Caryophyllales	Angiosperm	Amaranthus	cochleitepalus	Aus	Aus	Sah	AU Central Desert
Amaranthus cochleitepalus	Amaranthaceae	Caryophyllales	Angiosperm	Amaranthus	cochleitepalus	Aus	Aus	Sah	AU Central Queensland
Amaranthus cochleitepalus	Amaranthaceae	Caryophyllales	Angiosperm	Amaranthus	cochleitepalus	Aus	Aus	Sah	AU Eastern Desert
Amaranthus cochleitepalus	Amaranthaceae	Caryophyllales	Angiosperm	Amaranthus	cochleitepalus	Aus	Aus	Sah	AU Eastern Queensland
Amaranthus cochleitepalus	Amaranthaceae	Caryophyllales	Angiosperm	Amaranthus	cochleitepalus	Aus	Aus	Sah	AU Great Sandy Desert Interzone
Amaranthus cochleitepalus	Amaranthaceae	Caryophyllales	Angiosperm	Amaranthus	cochleitepalus	Aus	Aus	Sah	AU Western Desert
Amaranthus cruentus	Amaranthaceae	Caryophyllales	Angiosperm	Amaranthus	cruentus	Ind/PNG	NGu	Sah	NGu
Amaranthus cruentus	Amaranthaceae	Caryophyllales	Angiosperm	Amaranthus	cruentus	Ind/Tim	LSI	Wal	LSI
Amaranthus cruentus	Amaranthaceae	Caryophyllales	Angiosperm	Amaranthus	cruentus	Phi	Phi	Wal	Phi
Amaranthus cuspidifolius	Amaranthaceae	Caryophyllales	Angiosperm	Amaranthus	cuspidifolius	Aus	Aus	Sah	AU Eastern Desert
Amaranthus cuspidifolius	Amaranthaceae	Caryophyllales	Angiosperm	Amaranthus	cuspidifolius	Aus	Aus	Sah	AU Eyre Peninsula
Amaranthus cuspidifolius	Amaranthaceae	Caryophyllales	Angiosperm	Amaranthus	cuspidifolius	Aus	Aus	Sah	AU Great Sandy Desert Interzone
Amaranthus cuspidifolius	Amaranthaceae	Caryophyllales	Angiosperm	Amaranthus	cuspidifolius	Aus	Aus	Sah	AU Western Desert
Amaranthus dubius	Amaranthaceae	Caryophyllales	Angiosperm	Amaranthus	dubius	Ind/PNG	NGu	Sah	NGu
Amaranthus dubius	Amaranthaceae	Caryophyllales	Angiosperm	Amaranthus	dubius	Ind	Jav	Sun	Jav
Amaranthus dubius	Amaranthaceae	Caryophyllales	Angiosperm	Amaranthus	dubius	Ind/Tim	LSI	Wal	LSI
Amaranthus grandiflorus	Amaranthaceae	Caryophyllales	Angiosperm	Amaranthus	grandiflorus	Aus	Aus	Sah	AU Adelaide
Amaranthus grandiflorus	Amaranthaceae	Caryophyllales	Angiosperm	Amaranthus	grandiflorus	Aus	Aus	Sah	AU Eastern Desert
Amaranthus grandiflorus	Amaranthaceae	Caryophyllales	Angiosperm	Amaranthus	grandiflorus	Aus	Aus	Sah	AU Eyre Peninsula
Amaranthus grandiflorus	Amaranthaceae	Caryophyllales	Angiosperm	Amaranthus	grandiflorus	Aus	Aus	Sah	AU Great Sandy Desert Interzone
Amaranthus grandiflorus	Amaranthaceae	Caryophyllales	Angiosperm	Amaranthus	grandiflorus	Aus	Aus	Sah	AU Western Desert
Amaranthus hybridus	Amaranthaceae	Caryophyllales	Angiosperm	Amaranthus	hybridus	Ind/PNG	NGu	Sah	NGu
Amaranthus hybridus	Amaranthaceae	Caryophyllales	Angiosperm	Amaranthus	hybridus	Lao	MAs	Sun	MAs
Amaranthus hybridus	Amaranthaceae	Caryophyllales	Angiosperm	Amaranthus	hybridus	Tha	MAs	Sun	MAs
Amaranthus hypochondriacus	Amaranthaceae	Caryophyllales	Angiosperm	Amaranthus	hypochondriacus	Lao	MAs	Sun	MAs
Amaranthus induratus	Amaranthaceae	Caryophyllales	Angiosperm	Amaranthus	induratus	Aus	Aus	Sah	AU Central Desert
Amaranthus induratus	Amaranthaceae	Caryophyllales	Angiosperm	Amaranthus	induratus	Aus	Aus	Sah	AU Great Sandy Desert Interzone
Amaranthus induratus	Amaranthaceae	Caryophyllales	Angiosperm	Amaranthus	induratus	Aus	Aus	Sah	AU Kimberley Plateau
Amaranthus interruptus	Amaranthaceae	Caryophyllales	Angiosperm	Amaranthus	interruptus	Aus	Aus	Sah	AU Arnhem Land
Amaranthus interruptus	Amaranthaceae	Caryophyllales	Angiosperm	Amaranthus	interruptus	Aus	Aus	Sah	AU Atherton Plateau
Amaranthus interruptus	Amaranthaceae	Caryophyllales	Angiosperm	Amaranthus	interruptus	Aus	Aus	Sah	AU Cape York Peninsula
Amaranthus interruptus	Amaranthaceae	Caryophyllales	Angiosperm	Amaranthus	interruptus	Aus	Aus	Sah	AU Central Desert
Amaranthus interruptus	Amaranthaceae	Caryophyllales	Angiosperm	Amaranthus	interruptus	Aus	Aus	Sah	AU Central Queensland
Amaranthus interruptus	Amaranthaceae	Caryophyllales	Angiosperm	Amaranthus	interruptus	Aus	Aus	Sah	AU Eastern Desert
Amaranthus interruptus	Amaranthaceae	Caryophyllales	Angiosperm	Amaranthus	interruptus	Aus	Aus	Sah	AU Eastern Queensland
Amaranthus interruptus	Amaranthaceae	Caryophyllales	Angiosperm	Amaranthus	interruptus	Aus	Aus	Sah	AU External Territories
Amaranthus interruptus	Amaranthaceae	Caryophyllales	Angiosperm	Amaranthus	interruptus	Aus	Aus	Sah	AU Great Sandy Desert Interzone
Amaranthus interruptus	Amaranthaceae	Caryophyllales	Angiosperm	Amaranthus	interruptus	Aus	Aus	Sah	AU Kimberley Plateau
Amaranthus interruptus	Amaranthaceae	Caryophyllales	Angiosperm	Amaranthus	interruptus	Aus	Aus	Sah	AU Western Desert
Amaranthus interruptus	Amaranthaceae	Caryophyllales	Angiosperm	Amaranthus	interruptus	Ind/PNG	NGu	Sah	NGu
Amaranthus leptostachyus	Amaranthaceae	Caryophyllales	Angiosperm	Amaranthus	leptostachyus	Ind/PNG	NGu	Sah	NGu
Amaranthus macrocarpus	Amaranthaceae	Caryophyllales	Angiosperm	Amaranthus	macrocarpus	Aus	Aus	Sah	AU Adelaide
Amaranthus macrocarpus	Amaranthaceae	Caryophyllales	Angiosperm	Amaranthus	macrocarpus	Aus	Aus	Sah	AU Central Queensland
Amaranthus macrocarpus	Amaranthaceae	Caryophyllales	Angiosperm	Amaranthus	macrocarpus	Aus	Aus	Sah	AU Eastern Desert
Amaranthus macrocarpus	Amaranthaceae	Caryophyllales	Angiosperm	Amaranthus	macrocarpus	Aus	Aus	Sah	AU Eastern Queensland
Amaranthus macrocarpus	Amaranthaceae	Caryophyllales	Angiosperm	Amaranthus	macrocarpus	Aus	Aus	Sah	AU Southeastern
Amaranthus mitchellii	Amaranthaceae	Caryophyllales	Angiosperm	Amaranthus	mitchellii	Aus	Aus	Sah	AU Cape York Peninsula
Amaranthus mitchellii	Amaranthaceae	Caryophyllales	Angiosperm	Amaranthus	mitchellii	Aus	Aus	Sah	AU Central Desert
Amaranthus mitchellii	Amaranthaceae	Caryophyllales	Angiosperm	Amaranthus	mitchellii	Aus	Aus	Sah	AU Central Queensland
Amaranthus mitchellii	Amaranthaceae	Caryophyllales	Angiosperm	Amaranthus	mitchellii	Aus	Aus	Sah	AU Eastern Desert
Amaranthus mitchellii	Amaranthaceae	Caryophyllales	Angiosperm	Amaranthus	mitchellii	Aus	Aus	Sah	AU Eastern Queensland
Amaranthus mitchellii	Amaranthaceae	Caryophyllales	Angiosperm	Amaranthus	mitchellii	Aus	Aus	Sah	AU Eyre Peninsula
Amaranthus mitchellii	Amaranthaceae	Caryophyllales	Angiosperm	Amaranthus	mitchellii	Aus	Aus	Sah	AU Great Sandy Desert Interzone
Amaranthus mitchellii	Amaranthaceae	Caryophyllales	Angiosperm	Amaranthus	mitchellii	Aus	Aus	Sah	AU Kimberley Plateau
Amaranthus mitchellii	Amaranthaceae	Caryophyllales	Angiosperm	Amaranthus	mitchellii	Aus	Aus	Sah	AU Southeastern
Amaranthus mitchellii	Amaranthaceae	Caryophyllales	Angiosperm	Amaranthus	mitchellii	Aus	Aus	Sah	AU Western Desert
Amaranthus rhombeus	Amaranthaceae	Caryophyllales	Angiosperm	Amaranthus	rhombeus	Aus	Aus	Sah	AU Arnhem Land
Amaranthus rhombeus	Amaranthaceae	Caryophyllales	Angiosperm	Amaranthus	rhombeus	Aus	Aus	Sah	AU Cape York Peninsula
Amaranthus spinosus	Amaranthaceae	Caryophyllales	Angiosperm	Amaranthus	spinosus	Ind/PNG	NGu	Sah	NGu
Amaranthus spinosus	Amaranthaceae	Caryophyllales	Angiosperm	Amaranthus	spinosus	Lao	MAs	Sun	MAs
Amaranthus spinosus	Amaranthaceae	Caryophyllales	Angiosperm	Amaranthus	spinosus	Myn	MAs	Sun	MAs
Amaranthus spinosus	Amaranthaceae	Caryophyllales	Angiosperm	Amaranthus	spinosus	Sin	MAs	Sun	MAs
Amaranthus spinosus	Amaranthaceae	Caryophyllales	Angiosperm	Amaranthus	spinosus	Tha	MAs	Sun	MAs
Amaranthus spinosus	Amaranthaceae	Caryophyllales	Angiosperm	Amaranthus	spinosus	Ind/Tim	LSI	Wal	LSI
Amaranthus spinosus	Amaranthaceae	Caryophyllales	Angiosperm	Amaranthus	spinosus	Phi	Phi	Wal	Phi
Amaranthus tricolor	Amaranthaceae	Caryophyllales	Angiosperm	Amaranthus	tricolor	Ind/PNG	NGu	Sah	NGu
Amaranthus tricolor	Amaranthaceae	Caryophyllales	Angiosperm	Amaranthus	tricolor	Lao	MAs	Sun	MAs
Amaranthus tricolor	Amaranthaceae	Caryophyllales	Angiosperm	Amaranthus	tricolor	Mly	MAs	Sun	MAs
Amaranthus tricolor	Amaranthaceae	Caryophyllales	Angiosperm	Amaranthus	tricolor	Ind	Mlk	Wal	Mlk
Amaranthus tricolor	Amaranthaceae	Caryophyllales	Angiosperm	Amaranthus	tricolor	Ind/Tim	LSI	Wal	LSI
Amaranthus tricolor	Amaranthaceae	Caryophyllales	Angiosperm	Amaranthus	tricolor	Phi	Phi	Wal	Phi
Amaranthus undulatus	Amaranthaceae	Caryophyllales	Angiosperm	Amaranthus	undulatus	Aus	Aus	Sah	AU Arnhem Land
Amaranthus undulatus	Amaranthaceae	Caryophyllales	Angiosperm	Amaranthus	undulatus	Aus	Aus	Sah	AU Cape York Peninsula
Amaranthus undulatus	Amaranthaceae	Caryophyllales	Angiosperm	Amaranthus	undulatus	Aus	Aus	Sah	AU Central Desert
Amaranthus undulatus	Amaranthaceae	Caryophyllales	Angiosperm	Amaranthus	undulatus	Aus	Aus	Sah	AU External Territories
Amaranthus undulatus	Amaranthaceae	Caryophyllales	Angiosperm	Amaranthus	undulatus	Aus	Aus	Sah	AU Great Sandy Desert Interzone
Amaranthus undulatus	Amaranthaceae	Caryophyllales	Angiosperm	Amaranthus	undulatus	Aus	Aus	Sah	AU Kimberley Plateau
Amaranthus undulatus	Amaranthaceae	Caryophyllales	Angiosperm	Amaranthus	undulatus	Aus	Aus	Sah	AU Southwestern
Amaranthus undulatus	Amaranthaceae	Caryophyllales	Angiosperm	Amaranthus	undulatus	Aus	Aus	Sah	AU Western Desert
Amaranthus viridis	Amaranthaceae	Caryophyllales	Angiosperm	Amaranthus	viridis	Ind/PNG	NGu	Sah	NGu
Amaranthus viridis	Amaranthaceae	Caryophyllales	Angiosperm	Amaranthus	viridis	Cam	MAs	Sun	MAs
Amaranthus viridis	Amaranthaceae	Caryophyllales	Angiosperm	Amaranthus	viridis	Ind	Jav	Sun	Jav
Amaranthus viridis	Amaranthaceae	Caryophyllales	Angiosperm	Amaranthus	viridis	Lao	MAs	Sun	MAs
Amaranthus viridis	Amaranthaceae	Caryophyllales	Angiosperm	Amaranthus	viridis	Vie	MAs	Sun	MAs
Amaranthus viridis	Amaranthaceae	Caryophyllales	Angiosperm	Amaranthus	viridis	Ind	Mlk	Wal	Mlk
Amaranthus viridis	Amaranthaceae	Caryophyllales	Angiosperm	Amaranthus	viridis	Ind/Tim	LSI	Wal	LSI
Amaranthus viridis	Amaranthaceae	Caryophyllales	Angiosperm	Amaranthus	viridis	Phi	Phi	Wal	Phi
Bassia monticola	Amaranthaceae	Caryophyllales	Angiosperm	Bassia	monticola	Mly	Bor	Sun	Bor
Centrostachys aquatica	Amaranthaceae	Caryophyllales	Angiosperm	Centrostachys	aquatica	Lao	MAs	Sun	MAs
Centrostachys aquatica	Amaranthaceae	Caryophyllales	Angiosperm	Centrostachys	aquatica	Myn	MAs	Sun	MAs
Cyathula prostrata	Amaranthaceae	Caryophyllales	Angiosperm	Cyathula	prostrata	Ind/PNG	NGu	Sah	NGu
Cyathula prostrata	Amaranthaceae	Caryophyllales	Angiosperm	Cyathula	prostrata	Cam	MAs	Sun	MAs
Cyathula prostrata	Amaranthaceae	Caryophyllales	Angiosperm	Cyathula	prostrata	Ind	Sum	Sun	Sum
Cyathula prostrata	Amaranthaceae	Caryophyllales	Angiosperm	Cyathula	prostrata	Ind/Mly/Bru	Bor	Sun	Bor
Cyathula prostrata	Amaranthaceae	Caryophyllales	Angiosperm	Cyathula	prostrata	Lao	MAs	Sun	MAs
Cyathula prostrata	Amaranthaceae	Caryophyllales	Angiosperm	Cyathula	prostrata	Mly	MAs	Sun	MAs
Cyathula prostrata	Amaranthaceae	Caryophyllales	Angiosperm	Cyathula	prostrata	Sin	MAs	Sun	MAs
Cyathula prostrata	Amaranthaceae	Caryophyllales	Angiosperm	Cyathula	prostrata	Vie	MAs	Sun	MAs
Cyathula prostrata	Amaranthaceae	Caryophyllales	Angiosperm	Cyathula	prostrata	Ind	Mlk	Wal	Mlk
Cyathula prostrata	Amaranthaceae	Caryophyllales	Angiosperm	Cyathula	prostrata	Ind	Sul	Wal	Sul
Cyathula prostrata	Amaranthaceae	Caryophyllales	Angiosperm	Cyathula	prostrata	Ind/Tim	LSI	Wal	LSI
Cyathula prostrata	Amaranthaceae	Caryophyllales	Angiosperm	Cyathula	prostrata	Phi	Phi	Wal	Phi
Cyathula tomentosa	Amaranthaceae	Caryophyllales	Angiosperm	Cyathula	tomentosa	Myn	MAs	Sun	MAs
Deeringia amaranthoides	Amaranthaceae	Caryophyllales	Angiosperm	Deeringia	amaranthoides	Aus	Aus	Sah	AU Atherton Plateau
Deeringia amaranthoides	Amaranthaceae	Caryophyllales	Angiosperm	Deeringia	amaranthoides	Aus	Aus	Sah	AU Cape York Peninsula
Deeringia amaranthoides	Amaranthaceae	Caryophyllales	Angiosperm	Deeringia	amaranthoides	Aus	Aus	Sah	AU Central Queensland
Deeringia amaranthoides	Amaranthaceae	Caryophyllales	Angiosperm	Deeringia	amaranthoides	Aus	Aus	Sah	AU Eastern Desert
Deeringia amaranthoides	Amaranthaceae	Caryophyllales	Angiosperm	Deeringia	amaranthoides	Aus	Aus	Sah	AU Eastern Queensland
Deeringia amaranthoides	Amaranthaceae	Caryophyllales	Angiosperm	Deeringia	amaranthoides	Aus	Aus	Sah	AU Kimberley Plateau
Deeringia amaranthoides	Amaranthaceae	Caryophyllales	Angiosperm	Deeringia	amaranthoides	Aus	Aus	Sah	AU Southeastern
Deeringia amaranthoides	Amaranthaceae	Caryophyllales	Angiosperm	Deeringia	amaranthoides	Ind/PNG	NGu	Sah	NGu
Deeringia amaranthoides	Amaranthaceae	Caryophyllales	Angiosperm	Deeringia	amaranthoides	Ind	Jav	Sun	Jav
Deeringia amaranthoides	Amaranthaceae	Caryophyllales	Angiosperm	Deeringia	amaranthoides	Ind/Mly/Bru	Bor	Sun	Bor
Deeringia amaranthoides	Amaranthaceae	Caryophyllales	Angiosperm	Deeringia	amaranthoides	Lao	MAs	Sun	MAs
Deeringia amaranthoides	Amaranthaceae	Caryophyllales	Angiosperm	Deeringia	amaranthoides	Mly	MAs	Sun	MAs
Deeringia amaranthoides	Amaranthaceae	Caryophyllales	Angiosperm	Deeringia	amaranthoides	Myn	MAs	Sun	MAs
Deeringia amaranthoides	Amaranthaceae	Caryophyllales	Angiosperm	Deeringia	amaranthoides	Ind	Sul	Wal	Sul
Deeringia amaranthoides	Amaranthaceae	Caryophyllales	Angiosperm	Deeringia	amaranthoides	Ind/Tim	LSI	Wal	LSI
Deeringia amaranthoides	Amaranthaceae	Caryophyllales	Angiosperm	Deeringia	amaranthoides	Phi	Phi	Wal	Phi
Deeringia arborescens	Amaranthaceae	Caryophyllales	Angiosperm	Deeringia	arborescens	Aus	Aus	Sah	AU Atherton Plateau
Deeringia arborescens	Amaranthaceae	Caryophyllales	Angiosperm	Deeringia	arborescens	Aus	Aus	Sah	AU Cape York Peninsula
Deeringia arborescens	Amaranthaceae	Caryophyllales	Angiosperm	Deeringia	arborescens	Aus	Aus	Sah	AU Eastern Queensland
Deeringia arborescens	Amaranthaceae	Caryophyllales	Angiosperm	Deeringia	arborescens	Aus	Aus	Sah	AU Kimberley Plateau
Deeringia arborescens	Amaranthaceae	Caryophyllales	Angiosperm	Deeringia	arborescens	Aus	Aus	Sah	AU Southeastern
Deeringia arborescens	Amaranthaceae	Caryophyllales	Angiosperm	Deeringia	arborescens	Ind/PNG	NGu	Sah	NGu
Deeringia polysperma	Amaranthaceae	Caryophyllales	Angiosperm	Deeringia	polysperma	Ind/PNG	NGu	Sah	NGu
Deeringia polysperma	Amaranthaceae	Caryophyllales	Angiosperm	Deeringia	polysperma	Ind/Mly/Bru	Bor	Sun	Bor
Deeringia polysperma	Amaranthaceae	Caryophyllales	Angiosperm	Deeringia	polysperma	Mly	MAs	Sun	MAs
Deeringia polysperma	Amaranthaceae	Caryophyllales	Angiosperm	Deeringia	polysperma	Ind	Mlk	Wal	Mlk
Deeringia polysperma	Amaranthaceae	Caryophyllales	Angiosperm	Deeringia	polysperma	Ind	Sul	Wal	Sul
Deeringia polysperma	Amaranthaceae	Caryophyllales	Angiosperm	Deeringia	polysperma	Phi	Phi	Wal	Phi
Deeringia polysperma	Amaranthaceae	Caryophyllales	Angiosperm	Deeringia	polysperma	Ind	LSI	Wal	LSI
Deeringia tetragyna	Amaranthaceae	Caryophyllales	Angiosperm	Deeringia	tetragyna	Ind	Mlk	Wal	Mlk
Digera muricata	Amaranthaceae	Caryophyllales	Angiosperm	Digera	muricata	Ind	Jav	Sun	Jav
Digera muricata	Amaranthaceae	Caryophyllales	Angiosperm	Digera	muricata	Myn	MAs	Sun	MAs
Digera muricata	Amaranthaceae	Caryophyllales	Angiosperm	Digera	muricata	Ind	Mlk	Wal	Mlk
Digera muricata	Amaranthaceae	Caryophyllales	Angiosperm	Digera	muricata	Ind/Tim	LSI	Wal	LSI
Digera muricata	Amaranthaceae	Caryophyllales	Angiosperm	Digera	muricata	Phi	Phi	Wal	Phi
Gomphrena affinis	Amaranthaceae	Caryophyllales	Angiosperm	Gomphrena	affinis	Aus	Aus	Sah	AU Arnhem Land
Gomphrena affinis	Amaranthaceae	Caryophyllales	Angiosperm	Gomphrena	affinis	Aus	Aus	Sah	AU Central Desert
Gomphrena affinis	Amaranthaceae	Caryophyllales	Angiosperm	Gomphrena	affinis	Aus	Aus	Sah	AU Great Sandy Desert Interzone
Gomphrena affinis	Amaranthaceae	Caryophyllales	Angiosperm	Gomphrena	affinis	Aus	Aus	Sah	AU Kimberley Plateau
Gomphrena affinis	Amaranthaceae	Caryophyllales	Angiosperm	Gomphrena	affinis	Aus	Aus	Sah	AU Western Desert
Gomphrena arida	Amaranthaceae	Caryophyllales	Angiosperm	Gomphrena	arida	Aus	Aus	Sah	AU Central Desert
Gomphrena arida	Amaranthaceae	Caryophyllales	Angiosperm	Gomphrena	arida	Aus	Aus	Sah	AU Central Queensland
Gomphrena arida	Amaranthaceae	Caryophyllales	Angiosperm	Gomphrena	arida	Aus	Aus	Sah	AU Eastern Desert
Gomphrena atrorubra	Amaranthaceae	Caryophyllales	Angiosperm	Gomphrena	atrorubra	Aus	Aus	Sah	AU Arnhem Land
Gomphrena brachystylis	Amaranthaceae	Caryophyllales	Angiosperm	Gomphrena	brachystylis	Aus	Aus	Sah	AU Arnhem Land
Gomphrena brachystylis	Amaranthaceae	Caryophyllales	Angiosperm	Gomphrena	brachystylis	Aus	Aus	Sah	AU Central Desert
Gomphrena brachystylis	Amaranthaceae	Caryophyllales	Angiosperm	Gomphrena	brachystylis	Aus	Aus	Sah	AU Eastern Desert
Gomphrena brachystylis	Amaranthaceae	Caryophyllales	Angiosperm	Gomphrena	brachystylis	Aus	Aus	Sah	AU Great Sandy Desert Interzone
Gomphrena brachystylis	Amaranthaceae	Caryophyllales	Angiosperm	Gomphrena	brachystylis	Aus	Aus	Sah	AU Kimberley Plateau
Gomphrena breviflora	Amaranthaceae	Caryophyllales	Angiosperm	Gomphrena	breviflora	Aus	Aus	Sah	AU Arnhem Land
Gomphrena breviflora	Amaranthaceae	Caryophyllales	Angiosperm	Gomphrena	breviflora	Aus	Aus	Sah	AU Cape York Peninsula
Gomphrena breviflora	Amaranthaceae	Caryophyllales	Angiosperm	Gomphrena	breviflora	Aus	Aus	Sah	AU Central Desert
Gomphrena breviflora	Amaranthaceae	Caryophyllales	Angiosperm	Gomphrena	breviflora	Aus	Aus	Sah	AU Central Queensland
Gomphrena breviflora	Amaranthaceae	Caryophyllales	Angiosperm	Gomphrena	breviflora	Aus	Aus	Sah	AU Eastern Desert
Gomphrena breviflora	Amaranthaceae	Caryophyllales	Angiosperm	Gomphrena	breviflora	Aus	Aus	Sah	AU Great Sandy Desert Interzone
Gomphrena breviflora	Amaranthaceae	Caryophyllales	Angiosperm	Gomphrena	breviflora	Aus	Aus	Sah	AU Kimberley Plateau
Gomphrena canescens	Amaranthaceae	Caryophyllales	Angiosperm	Gomphrena	canescens	Aus	Aus	Sah	AU Arnhem Land
Gomphrena canescens	Amaranthaceae	Caryophyllales	Angiosperm	Gomphrena	canescens	Aus	Aus	Sah	AU Cape York Peninsula
Gomphrena canescens	Amaranthaceae	Caryophyllales	Angiosperm	Gomphrena	canescens	Aus	Aus	Sah	AU Central Desert
Gomphrena canescens	Amaranthaceae	Caryophyllales	Angiosperm	Gomphrena	canescens	Aus	Aus	Sah	AU Central Queensland
Gomphrena canescens	Amaranthaceae	Caryophyllales	Angiosperm	Gomphrena	canescens	Aus	Aus	Sah	AU Eastern Desert
Gomphrena canescens	Amaranthaceae	Caryophyllales	Angiosperm	Gomphrena	canescens	Aus	Aus	Sah	AU Great Sandy Desert Interzone
Gomphrena canescens	Amaranthaceae	Caryophyllales	Angiosperm	Gomphrena	canescens	Aus	Aus	Sah	AU Kimberley Plateau
Gomphrena canescens	Amaranthaceae	Caryophyllales	Angiosperm	Gomphrena	canescens	Aus	Aus	Sah	AU Western Desert
Gomphrena celosioides	Amaranthaceae	Caryophyllales	Angiosperm	Gomphrena	celosioides	Ind/PNG	NGu	Sah	NGu
Gomphrena celosioides	Amaranthaceae	Caryophyllales	Angiosperm	Gomphrena	celosioides	Lao	MAs	Sun	MAs
Gomphrena celosioides	Amaranthaceae	Caryophyllales	Angiosperm	Gomphrena	celosioides	Mly	MAs	Sun	MAs
Gomphrena celosioides	Amaranthaceae	Caryophyllales	Angiosperm	Gomphrena	celosioides	Ind/Tim	LSI	Wal	LSI
Gomphrena celosioides	Amaranthaceae	Caryophyllales	Angiosperm	Gomphrena	celosioides	Phi	Phi	Wal	Phi
Gomphrena conferta	Amaranthaceae	Caryophyllales	Angiosperm	Gomphrena	conferta	Aus	Aus	Sah	AU Cape York Peninsula
Gomphrena conferta	Amaranthaceae	Caryophyllales	Angiosperm	Gomphrena	conferta	Aus	Aus	Sah	AU Kimberley Plateau
Gomphrena conica	Amaranthaceae	Caryophyllales	Angiosperm	Gomphrena	conica	Aus	Aus	Sah	AU Arnhem Land
Gomphrena conica	Amaranthaceae	Caryophyllales	Angiosperm	Gomphrena	conica	Aus	Aus	Sah	AU Western Desert
Gomphrena connata	Amaranthaceae	Caryophyllales	Angiosperm	Gomphrena	connata	Aus	Aus	Sah	AU Arnhem Land
Gomphrena connata	Amaranthaceae	Caryophyllales	Angiosperm	Gomphrena	connata	Aus	Aus	Sah	AU Kimberley Plateau
Gomphrena cucullata	Amaranthaceae	Caryophyllales	Angiosperm	Gomphrena	cucullata	Aus	Aus	Sah	AU Great Sandy Desert Interzone
Gomphrena cucullata	Amaranthaceae	Caryophyllales	Angiosperm	Gomphrena	cucullata	Aus	Aus	Sah	AU Kimberley Plateau
Gomphrena cunninghamii	Amaranthaceae	Caryophyllales	Angiosperm	Gomphrena	cunninghamii	Aus	Aus	Sah	AU Central Desert
Gomphrena cunninghamii	Amaranthaceae	Caryophyllales	Angiosperm	Gomphrena	cunninghamii	Aus	Aus	Sah	AU Eastern Desert
Gomphrena cunninghamii	Amaranthaceae	Caryophyllales	Angiosperm	Gomphrena	cunninghamii	Aus	Aus	Sah	AU Great Sandy Desert Interzone
Gomphrena cunninghamii	Amaranthaceae	Caryophyllales	Angiosperm	Gomphrena	cunninghamii	Aus	Aus	Sah	AU Kimberley Plateau
Gomphrena cunninghamii	Amaranthaceae	Caryophyllales	Angiosperm	Gomphrena	cunninghamii	Aus	Aus	Sah	AU Western Desert
Gomphrena diffusa	Amaranthaceae	Caryophyllales	Angiosperm	Gomphrena	diffusa	Aus	Aus	Sah	AU Arnhem Land
Gomphrena diffusa	Amaranthaceae	Caryophyllales	Angiosperm	Gomphrena	diffusa	Aus	Aus	Sah	AU Central Desert
Gomphrena diffusa	Amaranthaceae	Caryophyllales	Angiosperm	Gomphrena	diffusa	Aus	Aus	Sah	AU Eastern Desert
Gomphrena diffusa	Amaranthaceae	Caryophyllales	Angiosperm	Gomphrena	diffusa	Aus	Aus	Sah	AU Kimberley Plateau
Gomphrena eichleri	Amaranthaceae	Caryophyllales	Angiosperm	Gomphrena	eichleri	Aus	Aus	Sah	AU Kimberley Plateau
Gomphrena flaccida	Amaranthaceae	Caryophyllales	Angiosperm	Gomphrena	flaccida	Aus	Aus	Sah	AU Arnhem Land
Gomphrena flaccida	Amaranthaceae	Caryophyllales	Angiosperm	Gomphrena	flaccida	Aus	Aus	Sah	AU Cape York Peninsula
Gomphrena flaccida	Amaranthaceae	Caryophyllales	Angiosperm	Gomphrena	flaccida	Aus	Aus	Sah	AU Central Desert
Gomphrena flaccida	Amaranthaceae	Caryophyllales	Angiosperm	Gomphrena	flaccida	Aus	Aus	Sah	AU Central Queensland
Gomphrena flaccida	Amaranthaceae	Caryophyllales	Angiosperm	Gomphrena	flaccida	Aus	Aus	Sah	AU Eastern Queensland
Gomphrena flaccida	Amaranthaceae	Caryophyllales	Angiosperm	Gomphrena	flaccida	Aus	Aus	Sah	AU Great Sandy Desert Interzone
Gomphrena flaccida	Amaranthaceae	Caryophyllales	Angiosperm	Gomphrena	flaccida	Aus	Aus	Sah	AU Kimberley Plateau
Gomphrena floribunda	Amaranthaceae	Caryophyllales	Angiosperm	Gomphrena	floribunda	Aus	Aus	Sah	AU Arnhem Land
Gomphrena globosa	Amaranthaceae	Caryophyllales	Angiosperm	Gomphrena	globosa	Ind/PNG	NGu	Sah	NGu
Gomphrena globosa	Amaranthaceae	Caryophyllales	Angiosperm	Gomphrena	globosa	Lao	MAs	Sun	MAs
Gomphrena globosa	Amaranthaceae	Caryophyllales	Angiosperm	Gomphrena	globosa	Mly	MAs	Sun	MAs
Gomphrena globosa	Amaranthaceae	Caryophyllales	Angiosperm	Gomphrena	globosa	Myn	MAs	Sun	MAs
Gomphrena globosa	Amaranthaceae	Caryophyllales	Angiosperm	Gomphrena	globosa	Sin	MAs	Sun	MAs
Gomphrena globosa	Amaranthaceae	Caryophyllales	Angiosperm	Gomphrena	globosa	Ind	Mlk	Wal	Mlk
Gomphrena globosa	Amaranthaceae	Caryophyllales	Angiosperm	Gomphrena	globosa	Phi	Phi	Wal	Phi
Gomphrena humifusa	Amaranthaceae	Caryophyllales	Angiosperm	Gomphrena	humifusa	Aus	Aus	Sah	AU Great Sandy Desert Interzone
Gomphrena humifusa	Amaranthaceae	Caryophyllales	Angiosperm	Gomphrena	humifusa	Aus	Aus	Sah	AU Kimberley Plateau
Gomphrena humilis	Amaranthaceae	Caryophyllales	Angiosperm	Gomphrena	humilis	Aus	Aus	Sah	AU Arnhem Land
Gomphrena humilis	Amaranthaceae	Caryophyllales	Angiosperm	Gomphrena	humilis	Aus	Aus	Sah	AU Cape York Peninsula
Gomphrena humilis	Amaranthaceae	Caryophyllales	Angiosperm	Gomphrena	humilis	Aus	Aus	Sah	AU Central Queensland
Gomphrena humilis	Amaranthaceae	Caryophyllales	Angiosperm	Gomphrena	humilis	Aus	Aus	Sah	AU Eastern Queensland
Gomphrena involucrata	Amaranthaceae	Caryophyllales	Angiosperm	Gomphrena	involucrata	Aus	Aus	Sah	AU Arnhem Land
Gomphrena kanisii	Amaranthaceae	Caryophyllales	Angiosperm	Gomphrena	kanisii	Aus	Aus	Sah	AU Great Sandy Desert Interzone
Gomphrena kanisii	Amaranthaceae	Caryophyllales	Angiosperm	Gomphrena	kanisii	Aus	Aus	Sah	AU Western Desert
Gomphrena lacinulata	Amaranthaceae	Caryophyllales	Angiosperm	Gomphrena	lacinulata	Aus	Aus	Sah	AU Arnhem Land
Gomphrena lacinulata	Amaranthaceae	Caryophyllales	Angiosperm	Gomphrena	lacinulata	Aus	Aus	Sah	AU Kimberley Plateau
Gomphrena lanata	Amaranthaceae	Caryophyllales	Angiosperm	Gomphrena	lanata	Aus	Aus	Sah	AU Arnhem Land
Gomphrena lanata	Amaranthaceae	Caryophyllales	Angiosperm	Gomphrena	lanata	Aus	Aus	Sah	AU Atherton Plateau
[truncated: 144,117 more rows]
